# Supplementary figures and images for: Clinical significance of the immune microenvironment in ovarian cancer patients
Source: Royal Society of Chemistry journal article supplement (doi:10.1039/c8mo00128f), 2018-08-12

# GZMA for High Grade Serous Carcinoma

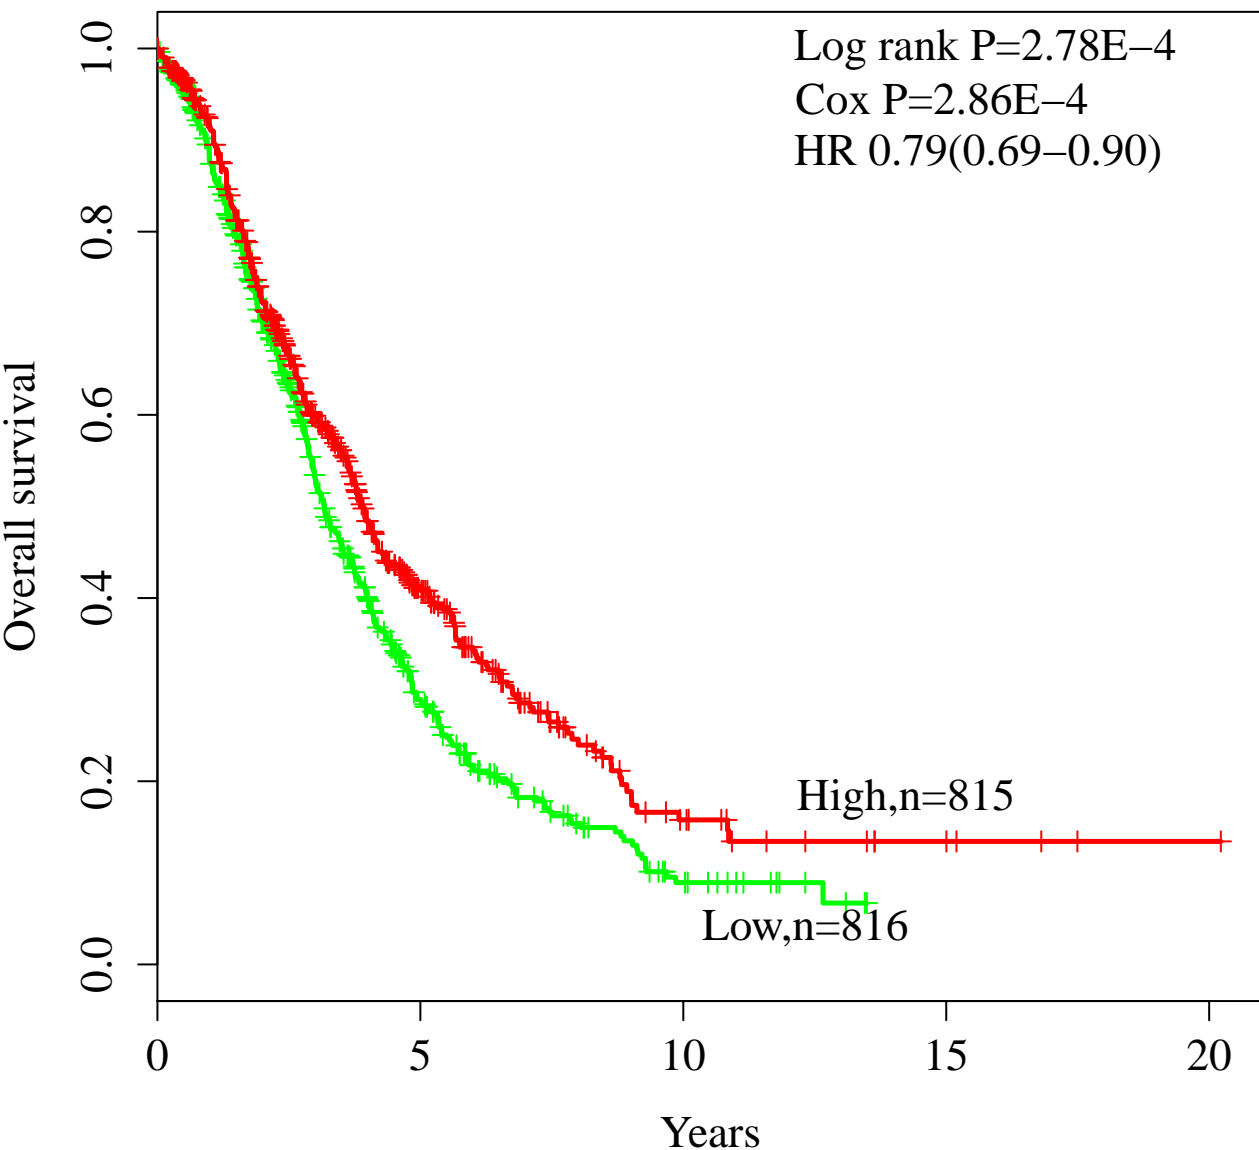

Supplement: c8mo00128f1.zip [file c8mo00128f1.zip]

# IRF1 for High Grade Serous Carcinoma

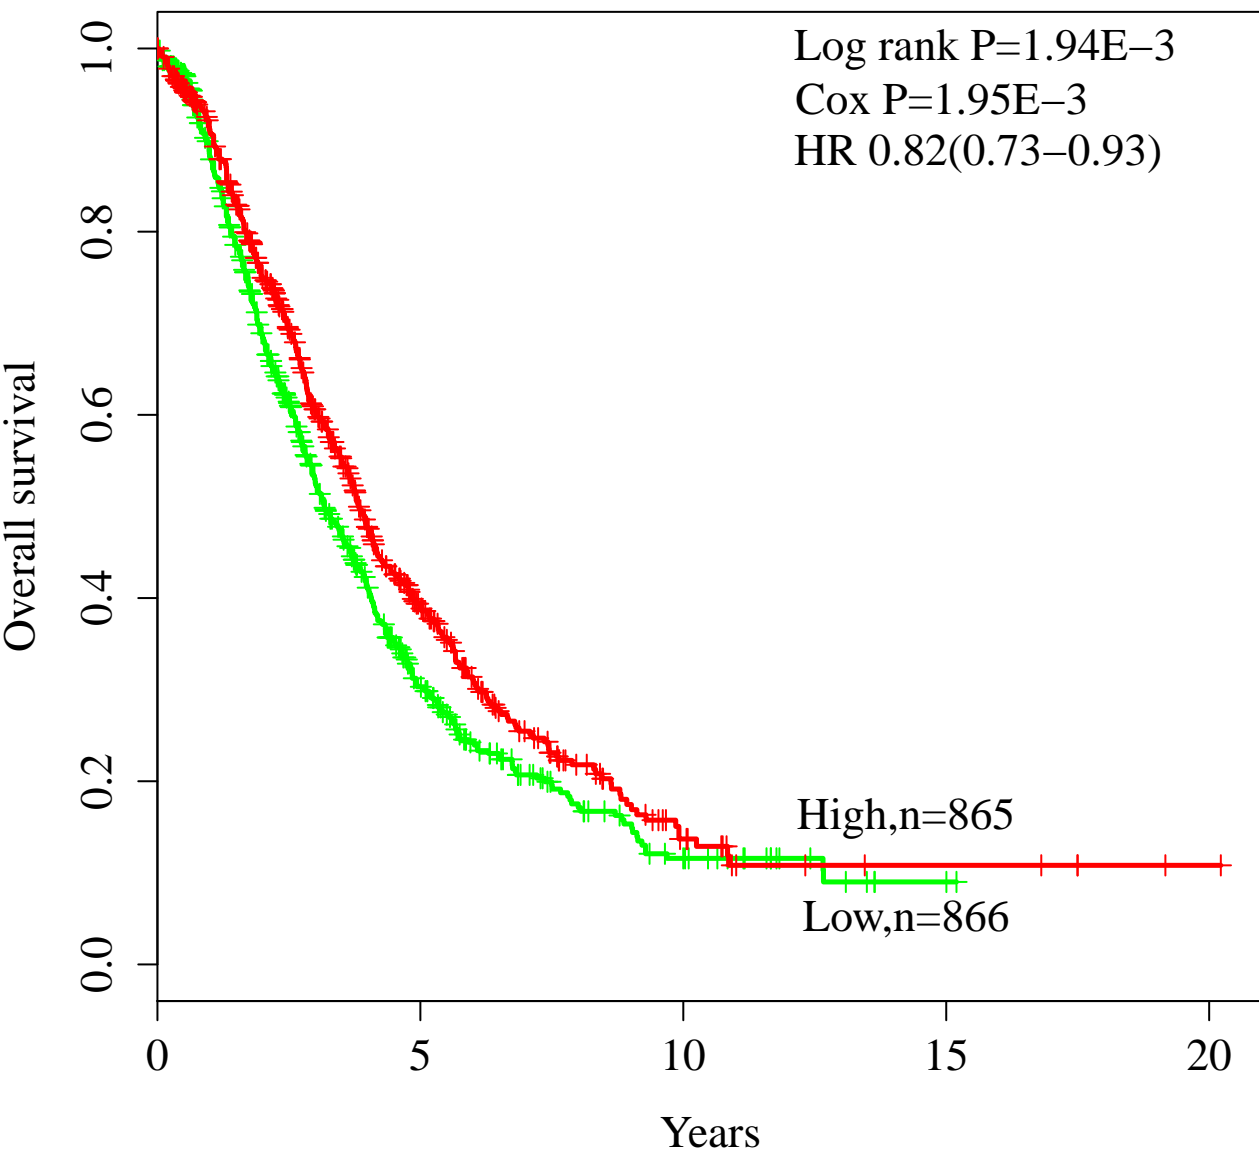

Supplement: c8mo00128f1.zip [file c8mo00128f1.zip]

# CD8B for Low Grade Serous Carcinoma

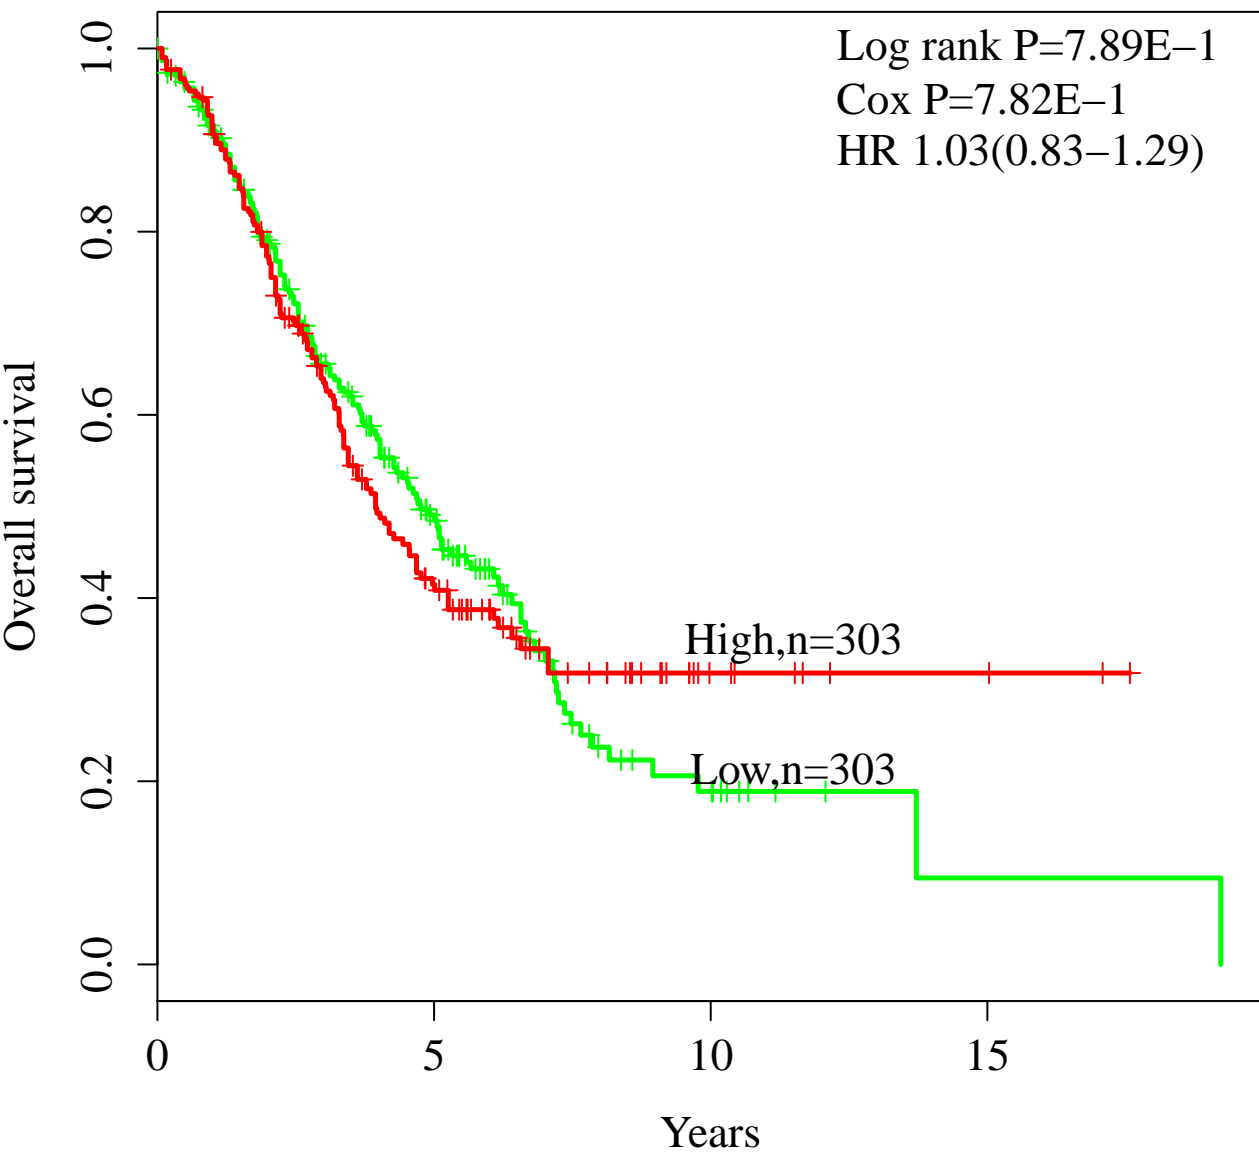

Supplement: c8mo00128f1.zip [file c8mo00128f1.zip]

# PRF1 for Mucinous Carcinoma

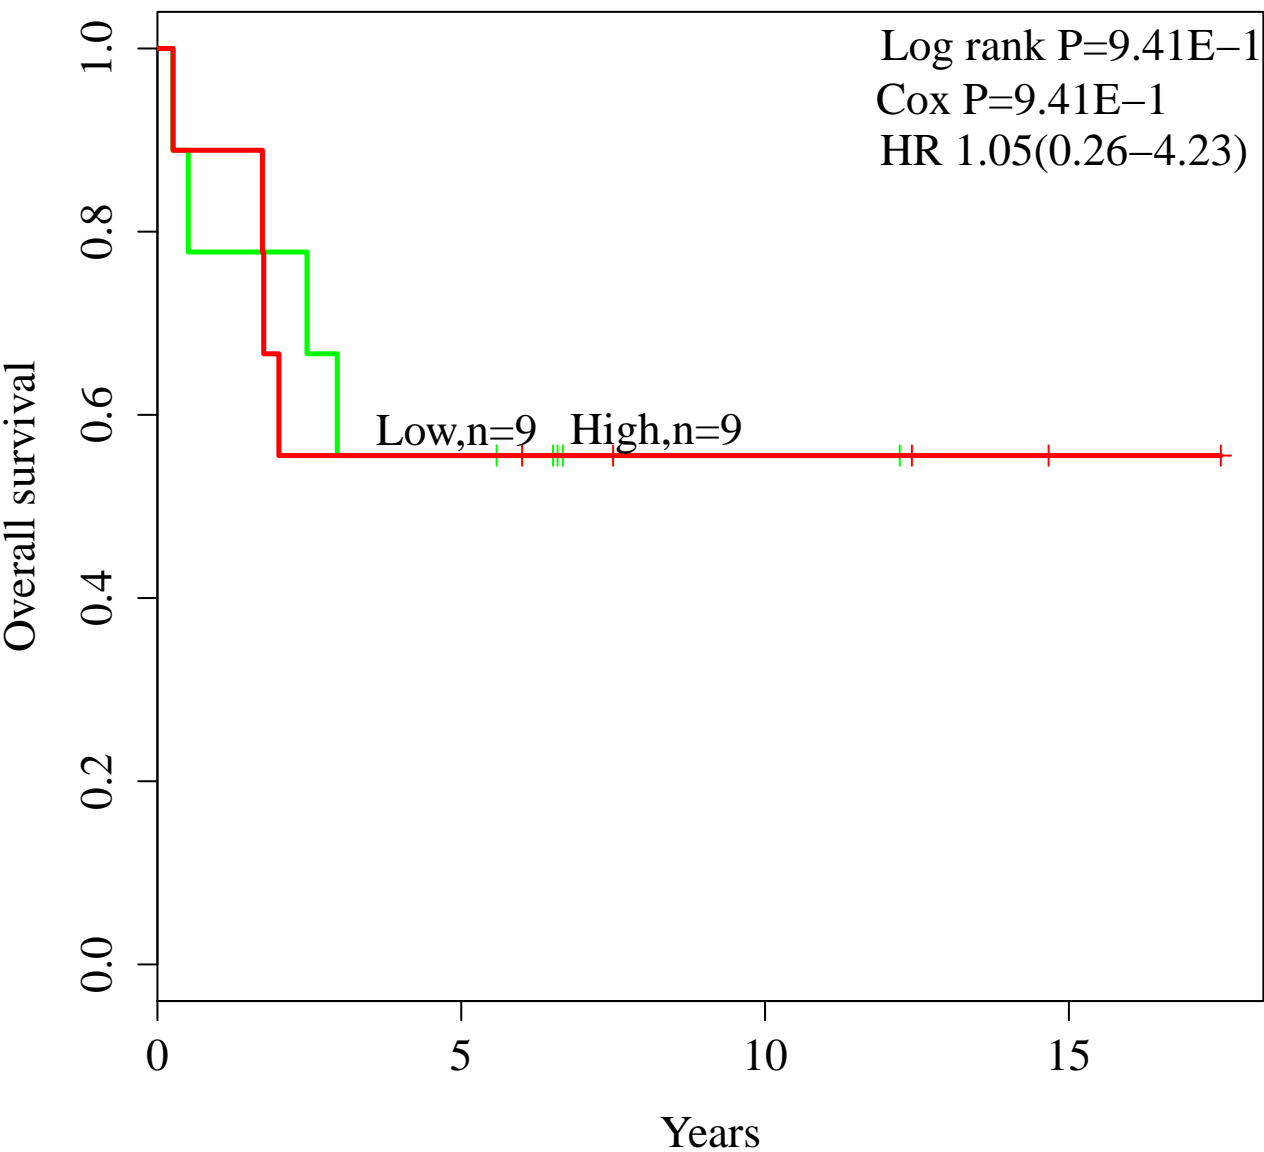

Supplement: c8mo00128f1.zip [file c8mo00128f1.zip]

# CD274 for Mucinous Carcinoma

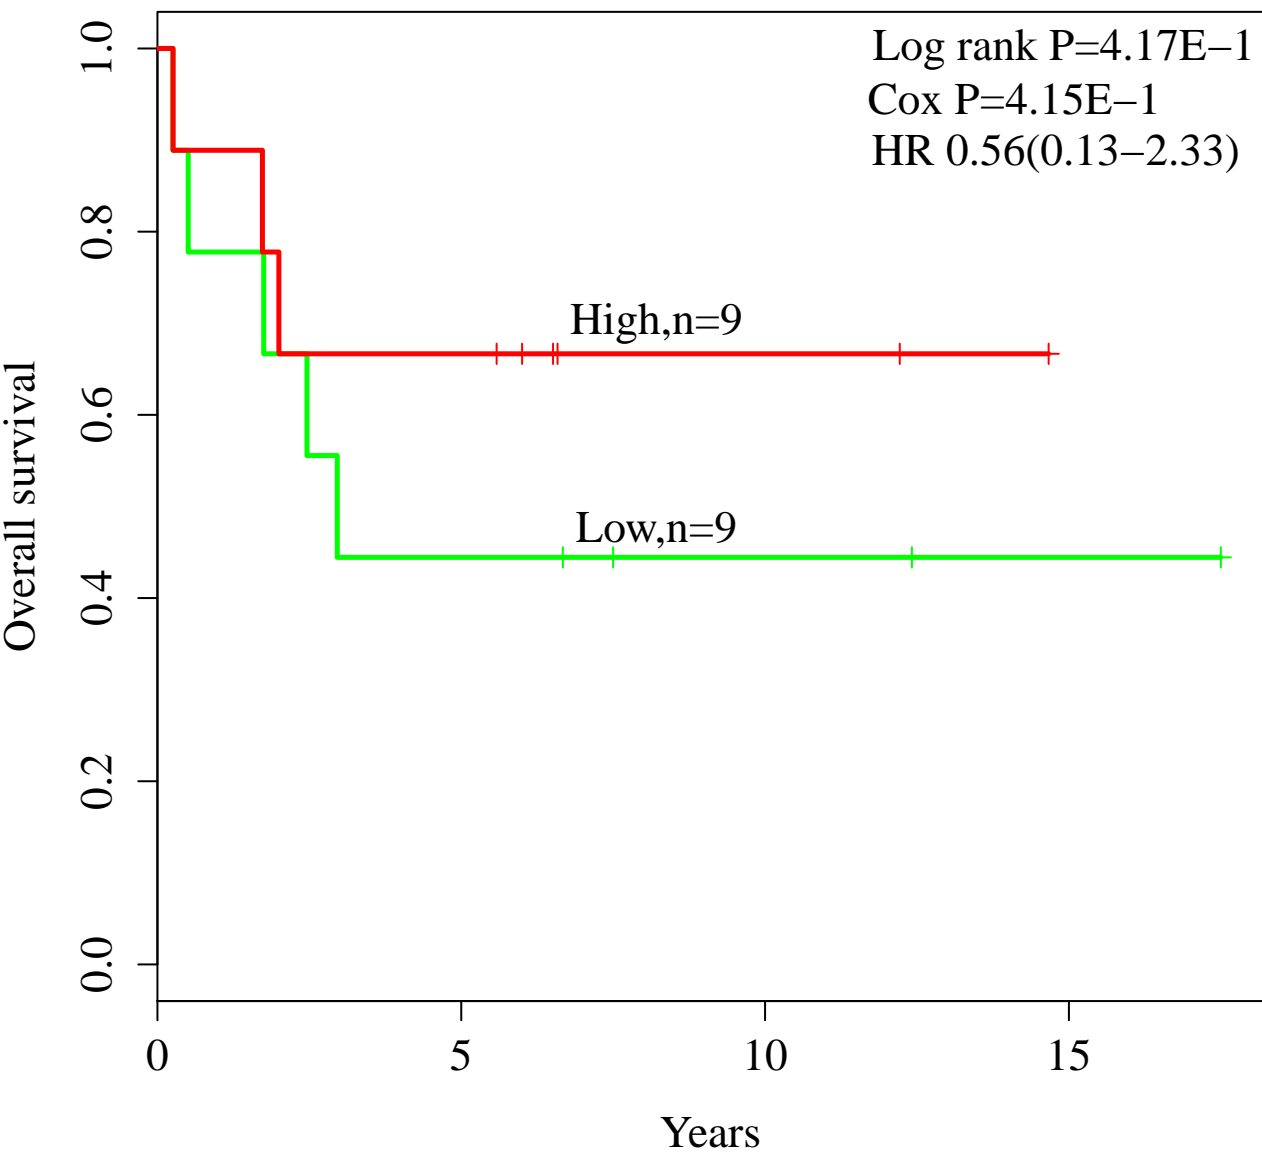

Supplement: c8mo00128f1.zip [file c8mo00128f1.zip]

# HLA-B for High Grade Serous Carcinoma

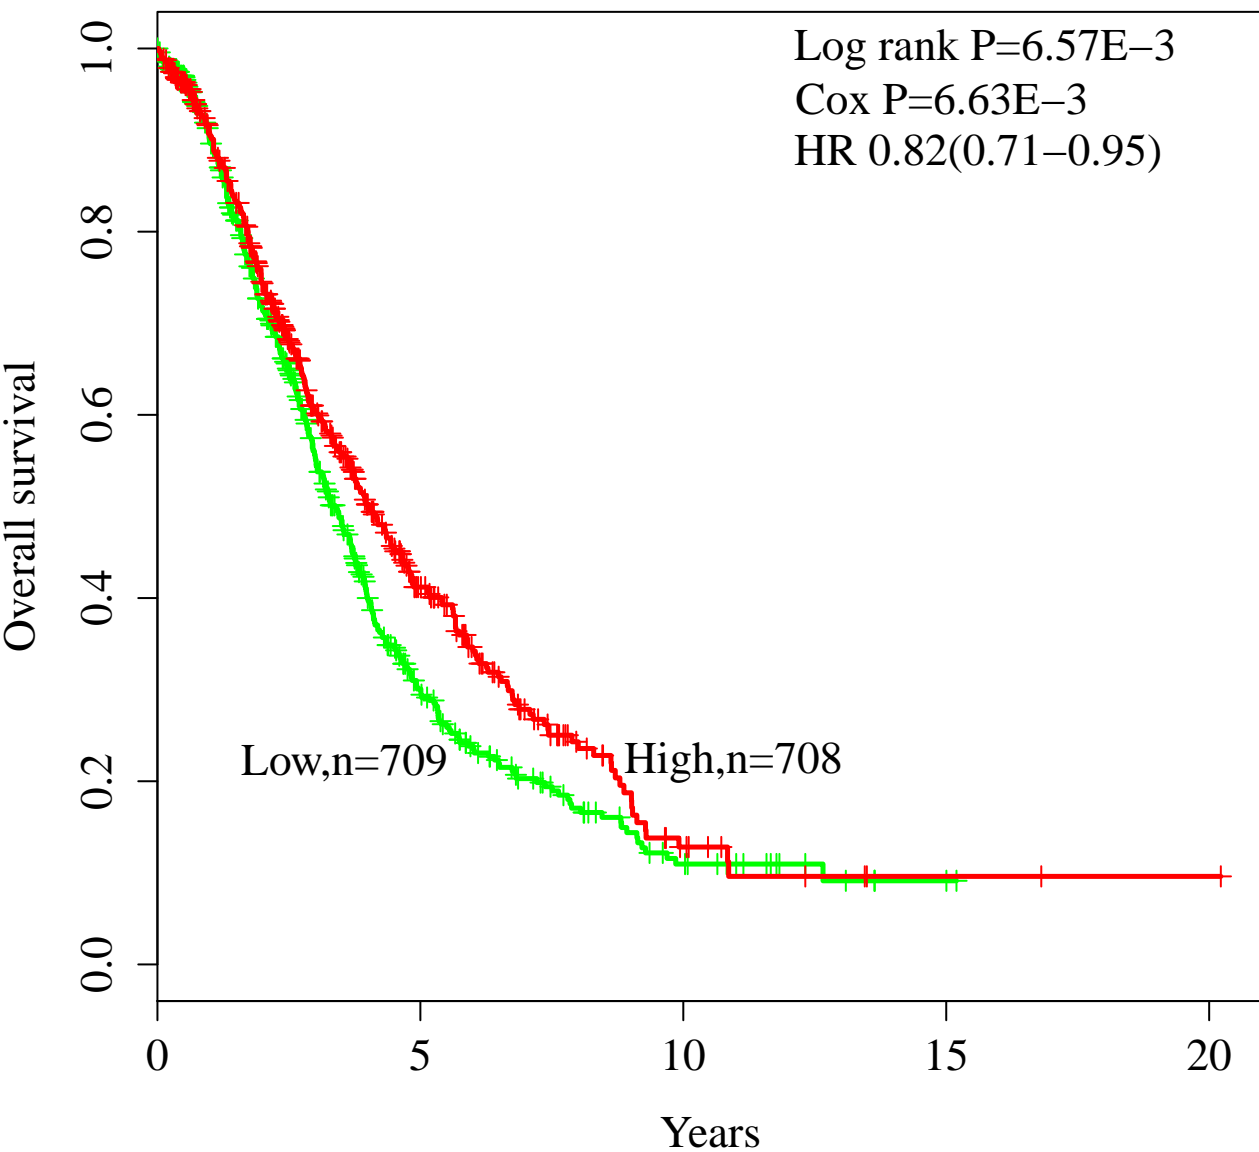

Supplement: c8mo00128f1.zip [file c8mo00128f1.zip]

# HLA-A for Low Grade Serous Carcinoma

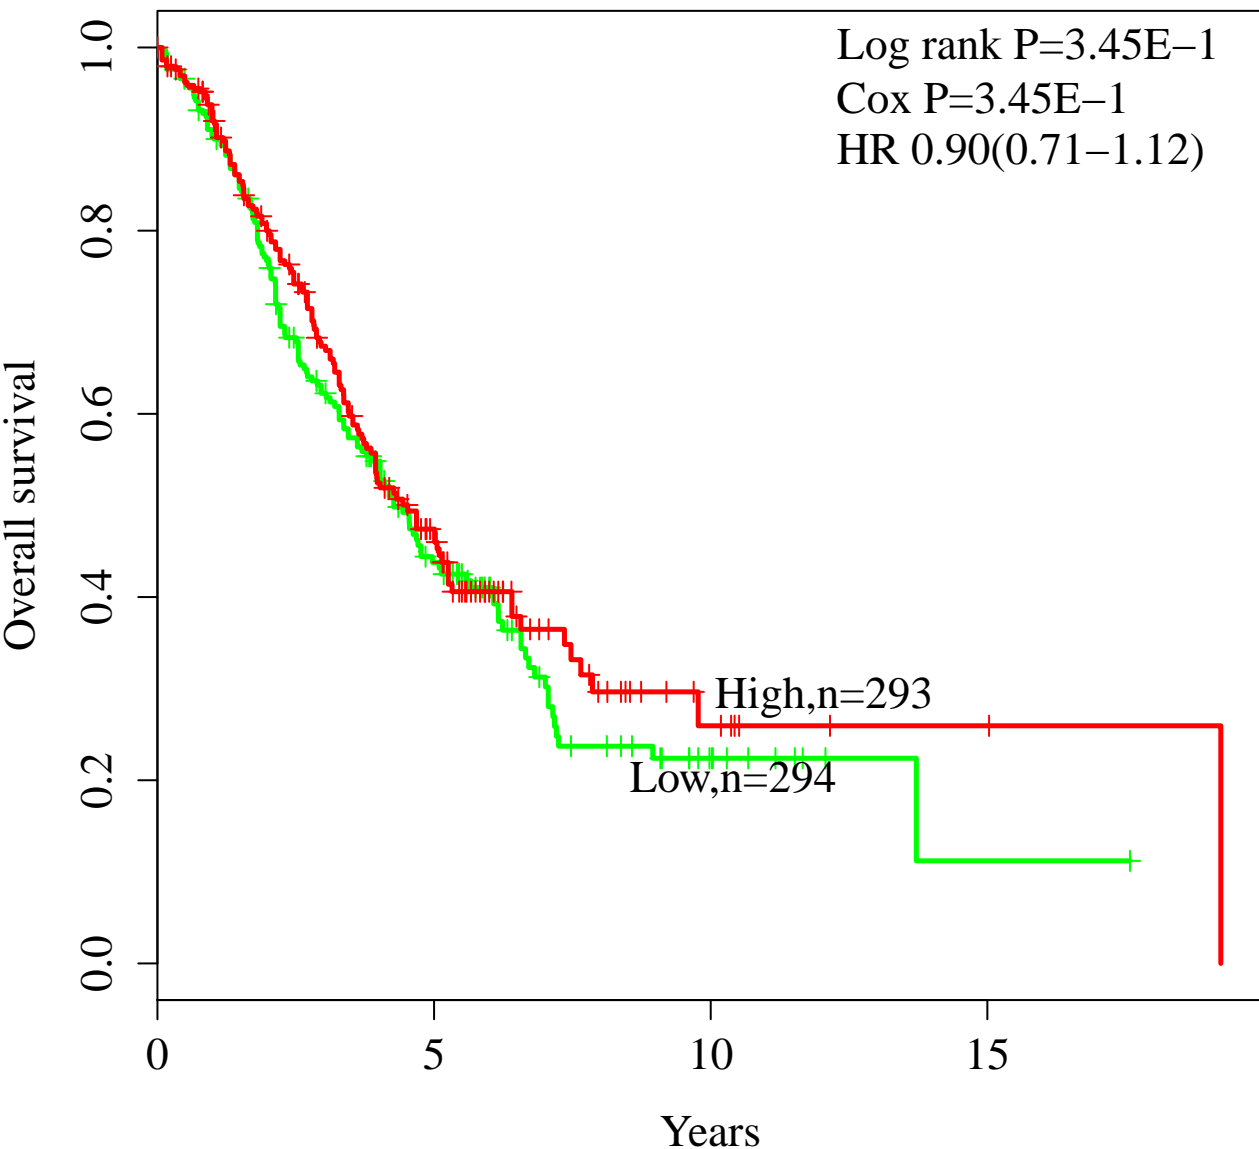

Supplement: c8mo00128f1.zip [file c8mo00128f1.zip]

# HLA-A for Clear Cell Carcinoma

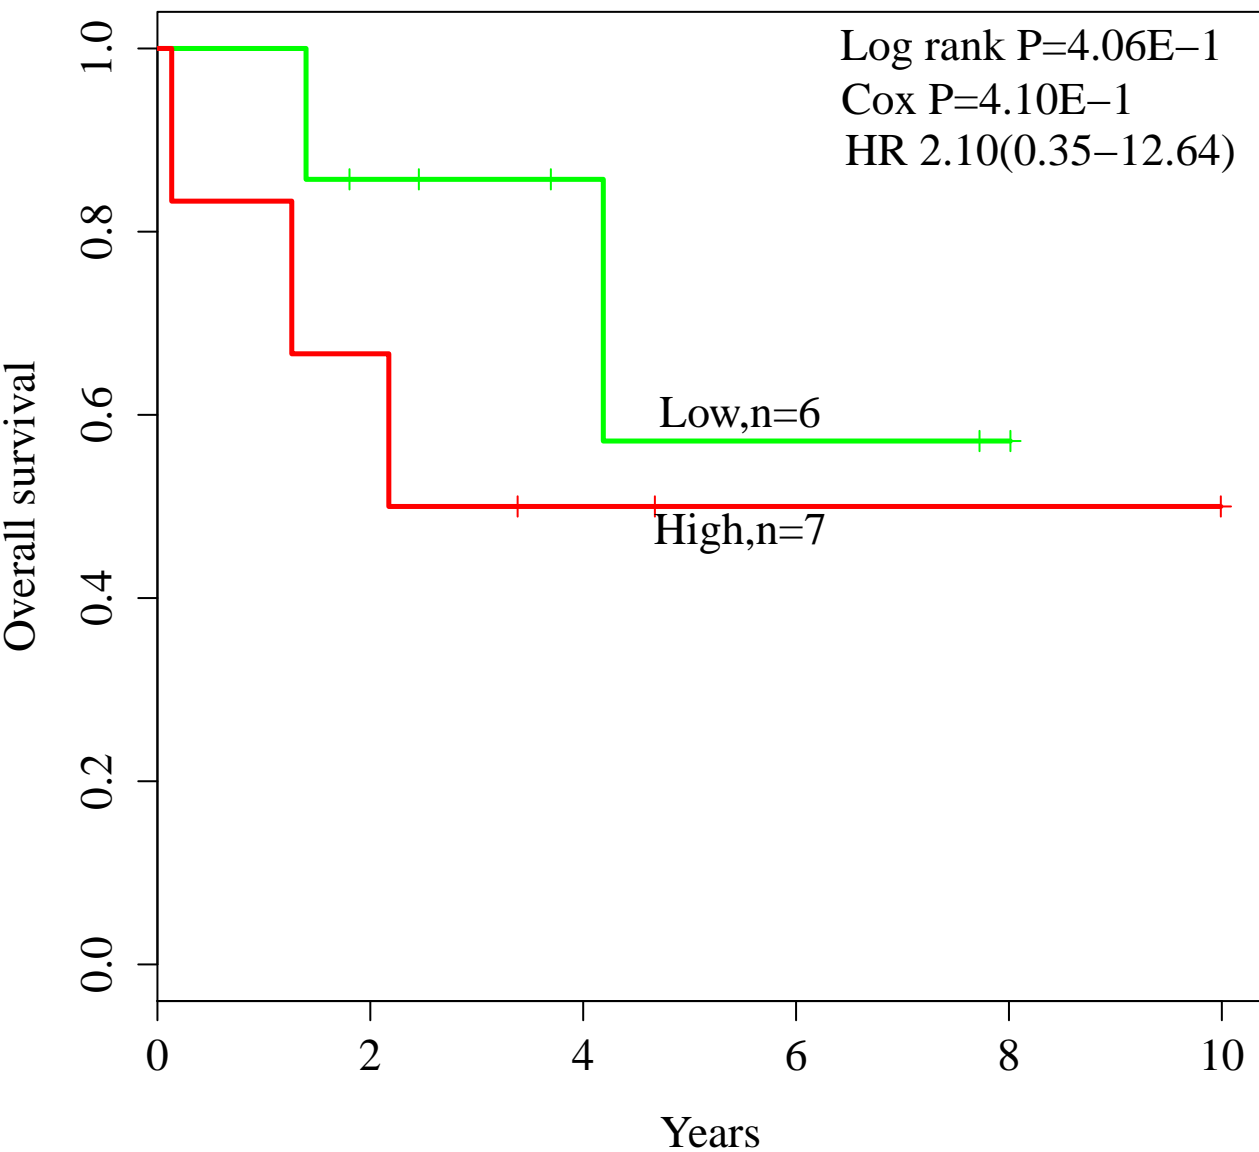

Supplement: c8mo00128f1.zip [file c8mo00128f1.zip]

# HLA-B for Low Grade Serous Carcinoma

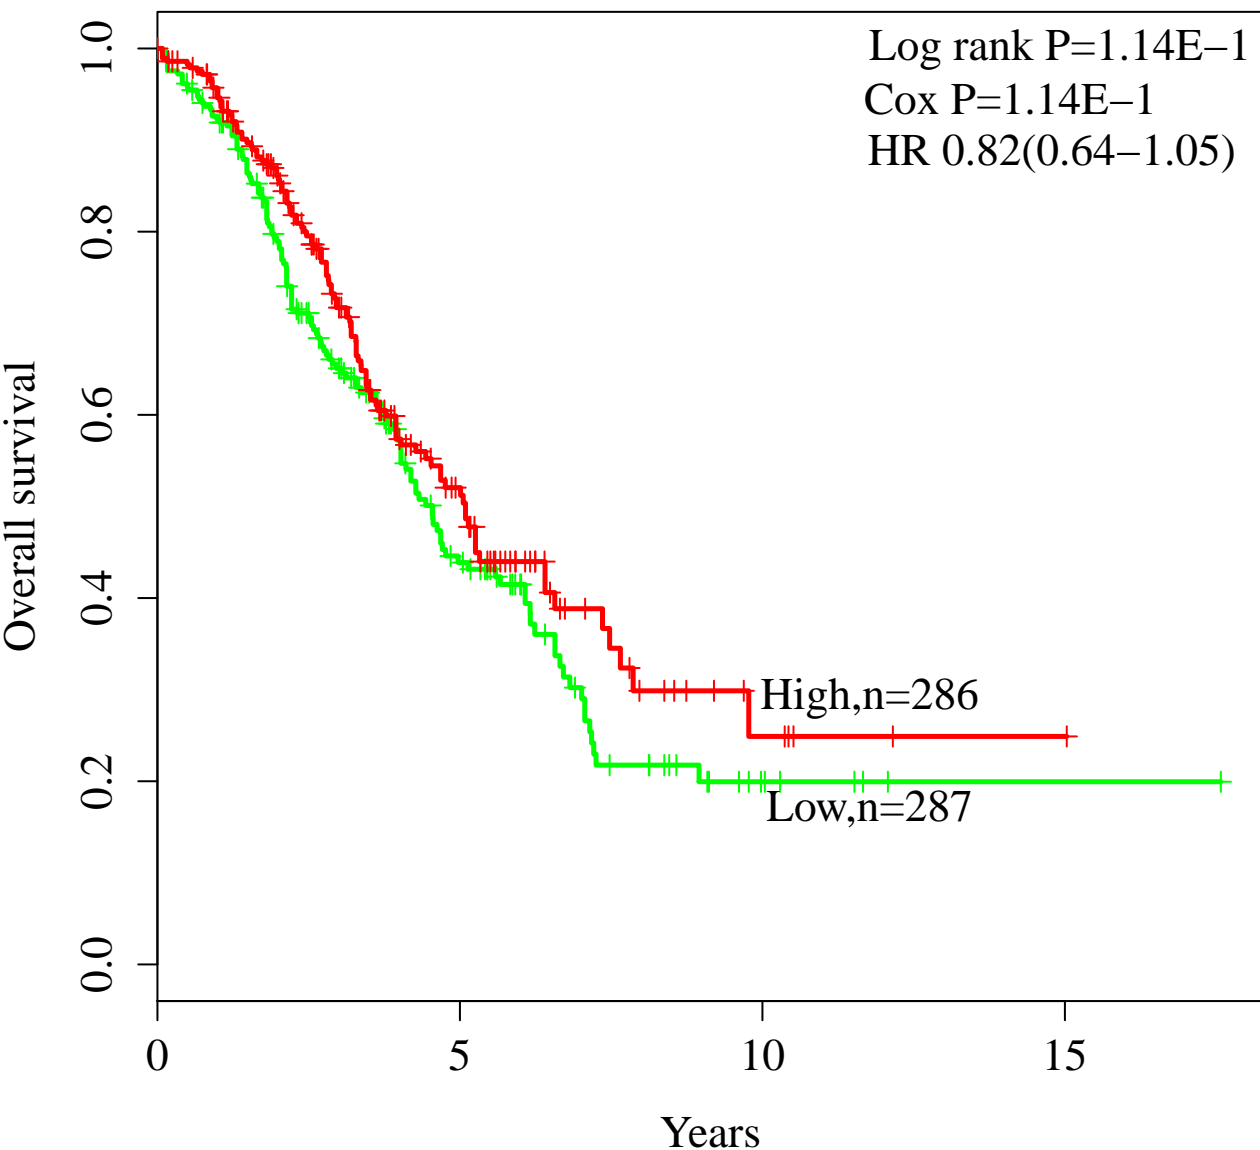

Supplement: c8mo00128f1.zip [file c8mo00128f1.zip]

# PDCD1 for High Grade Serous Carcinoma

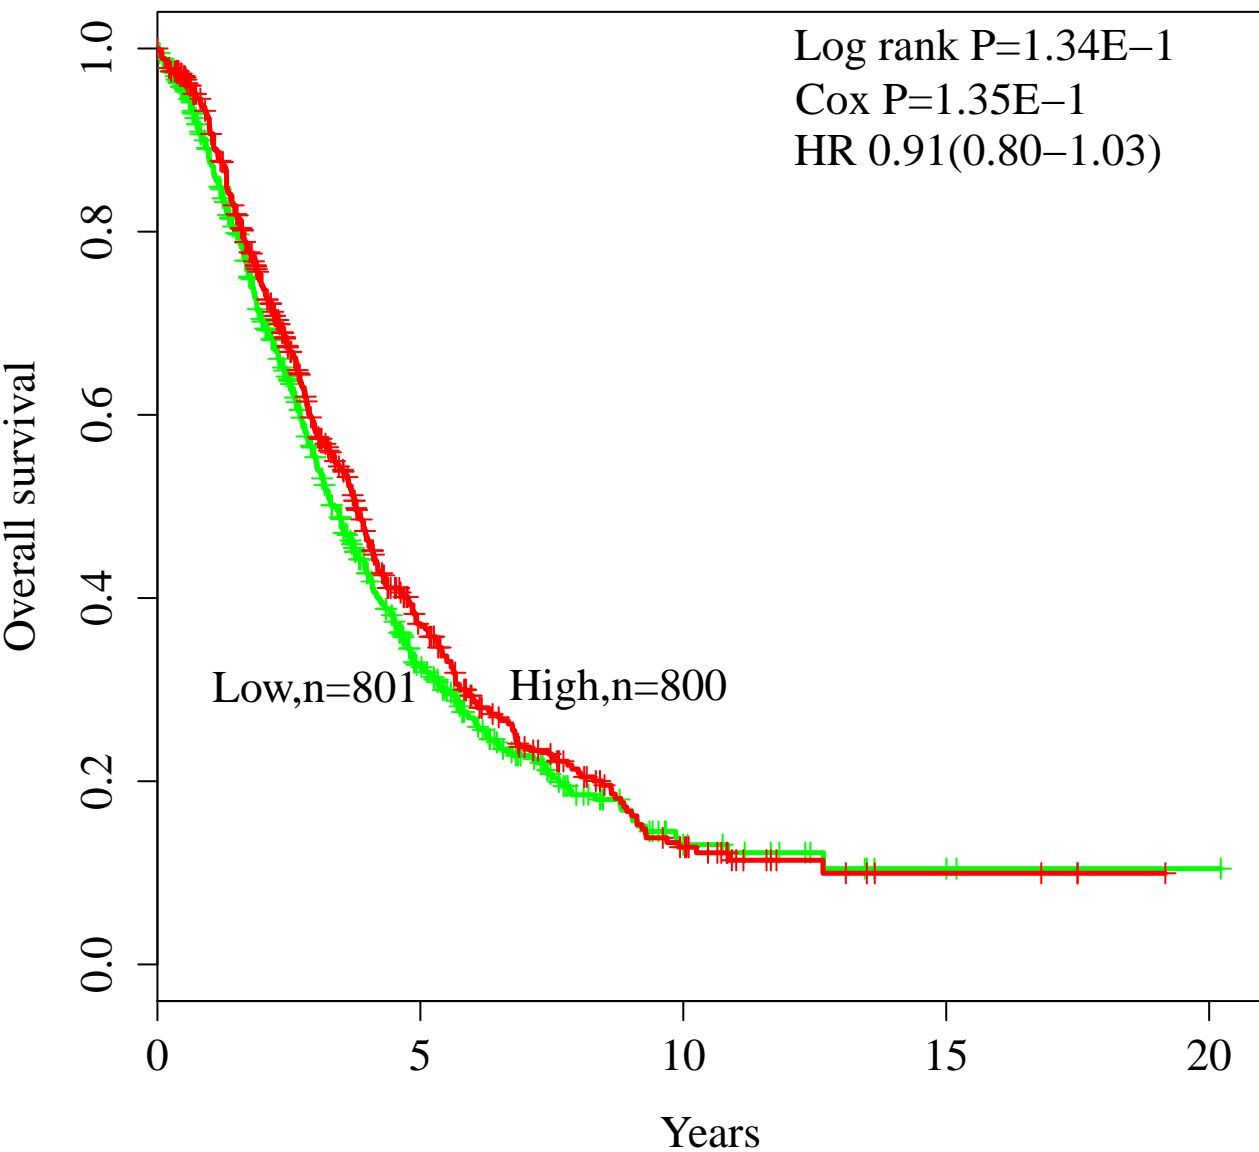

Supplement: c8mo00128f1.zip [file c8mo00128f1.zip]

# CD274 for Endometrioid Carcinoma

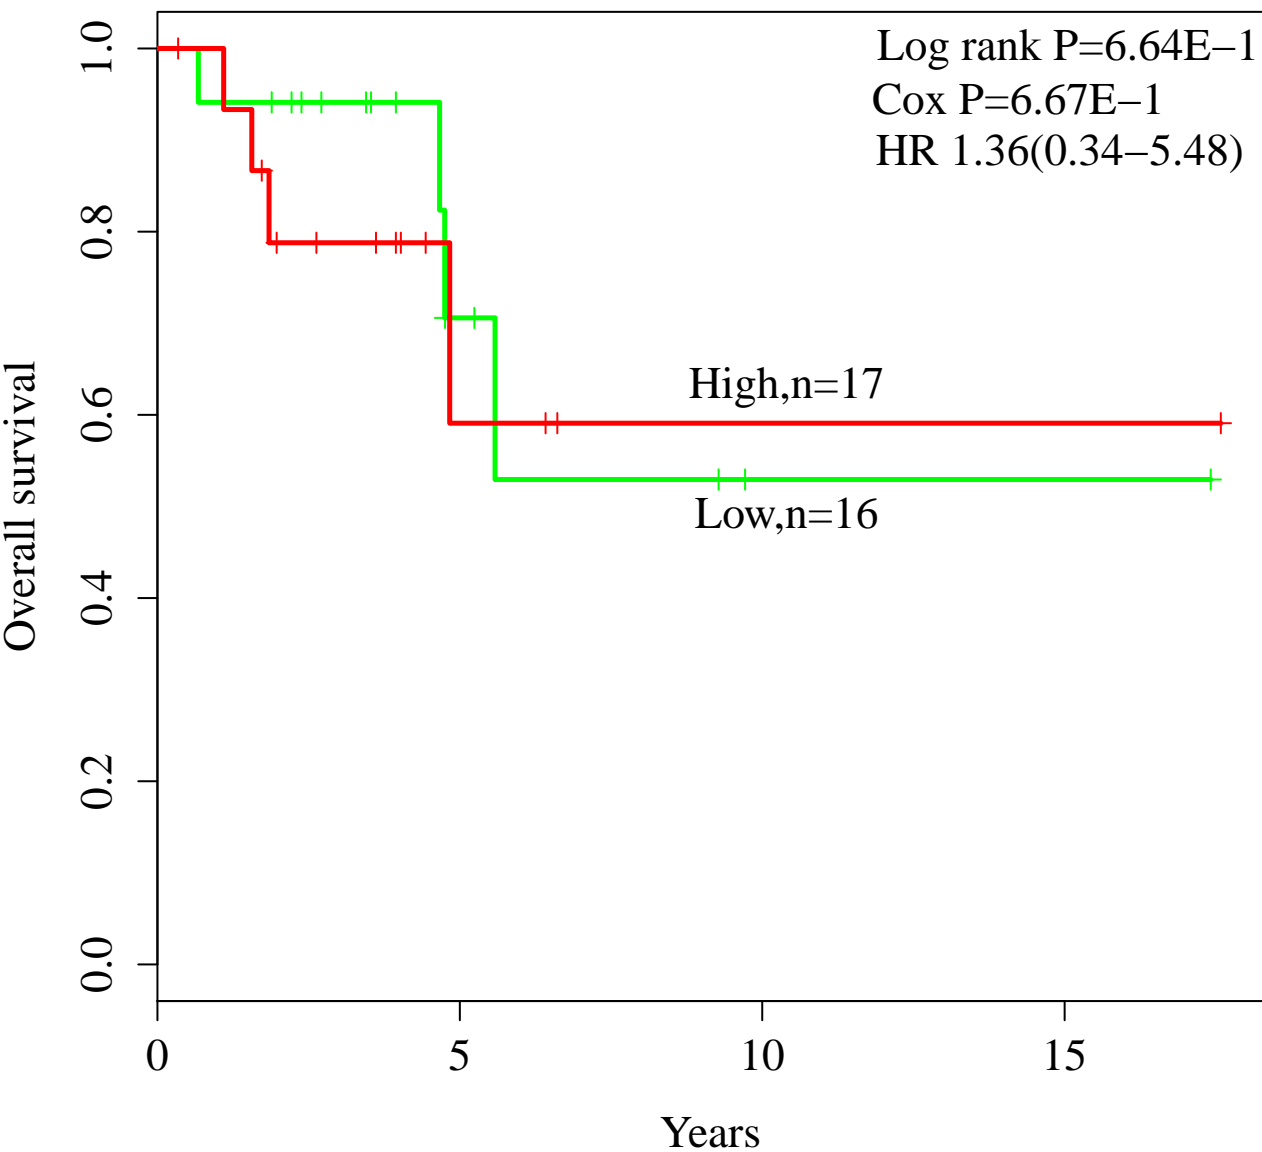

Supplement: c8mo00128f1.zip [file c8mo00128f1.zip]

# CD274 for High Grade Serous Carcinoma

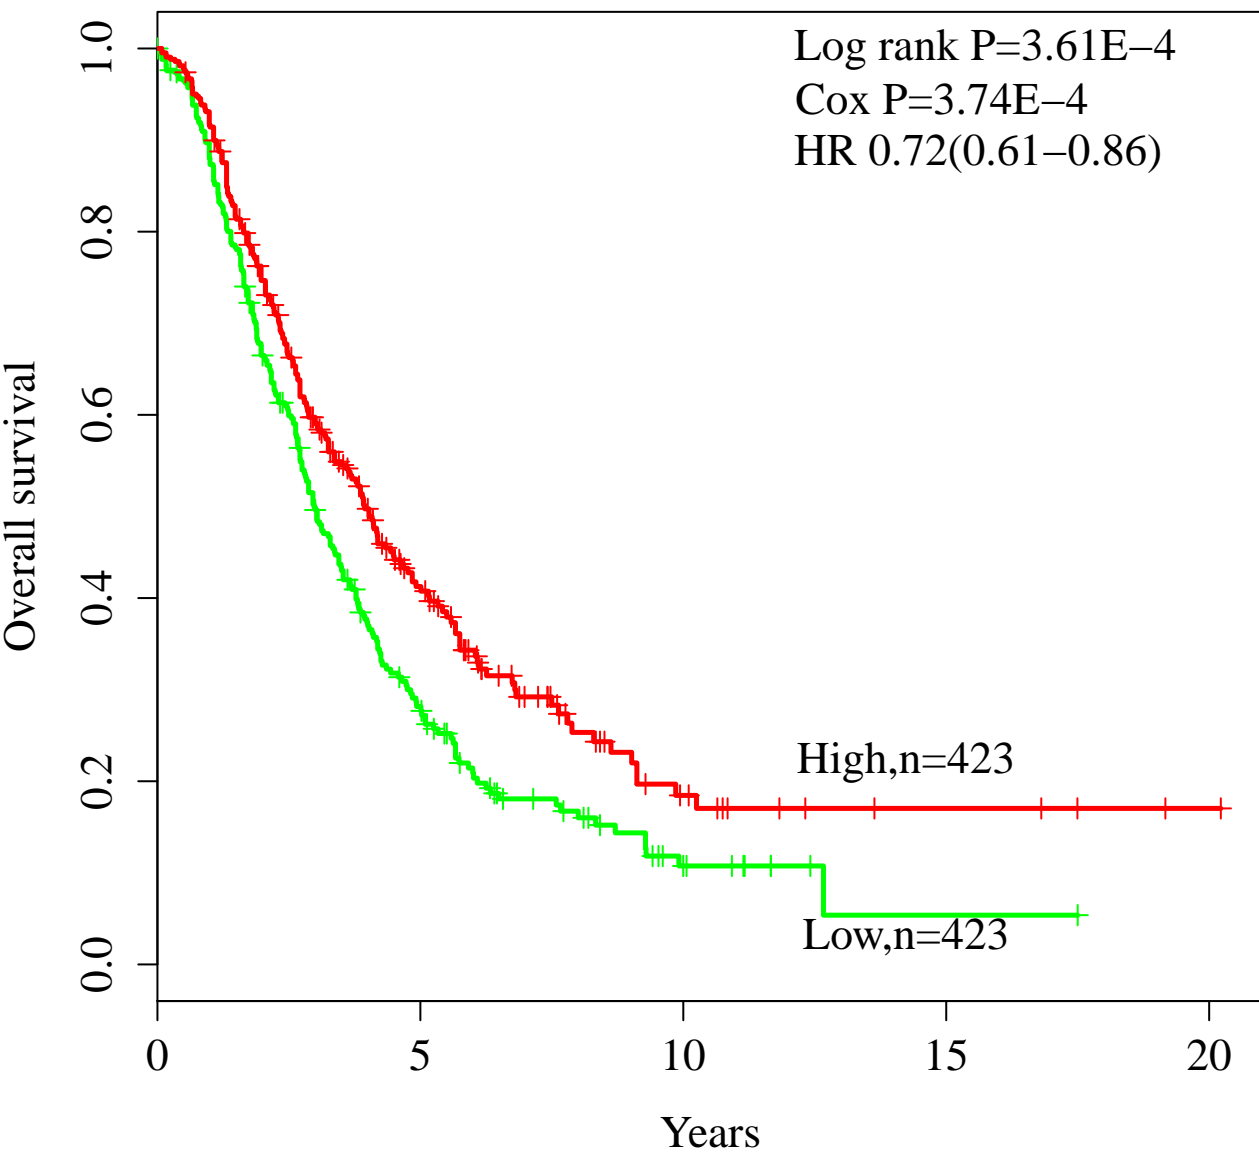

Supplement: c8mo00128f1.zip [file c8mo00128f1.zip]

# CD163 for Low Grade Serous Carcinoma

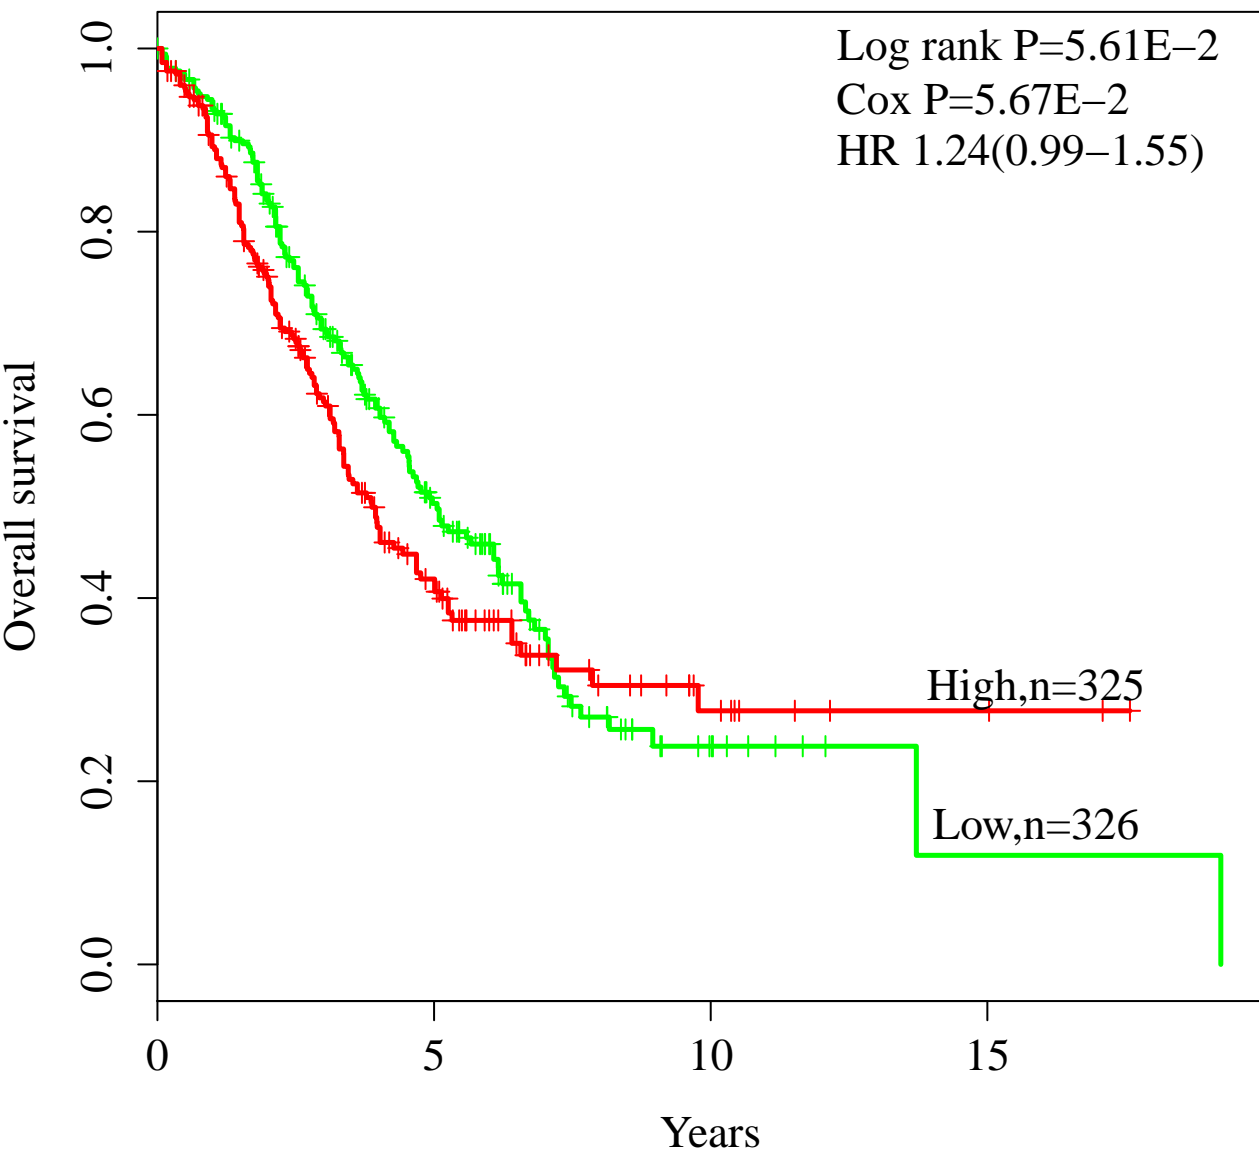

Supplement: c8mo00128f1.zip [file c8mo00128f1.zip]

# HLA-C for Low Grade Serous Carcinoma

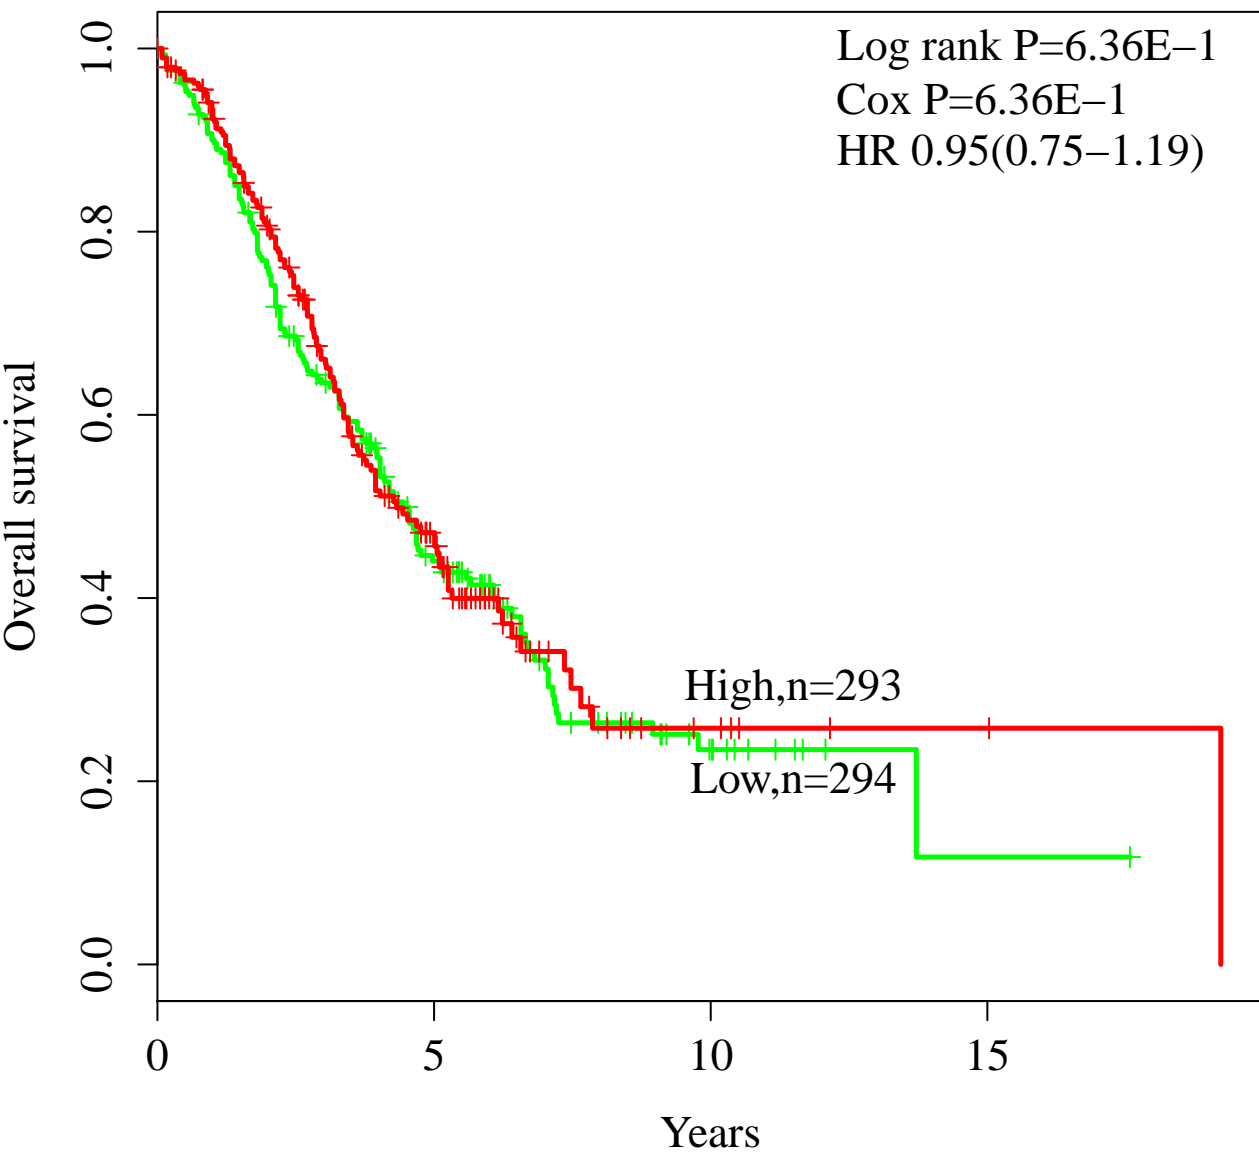

Supplement: c8mo00128f1.zip [file c8mo00128f1.zip]

# HLA-B for Clear Cell Carcinoma

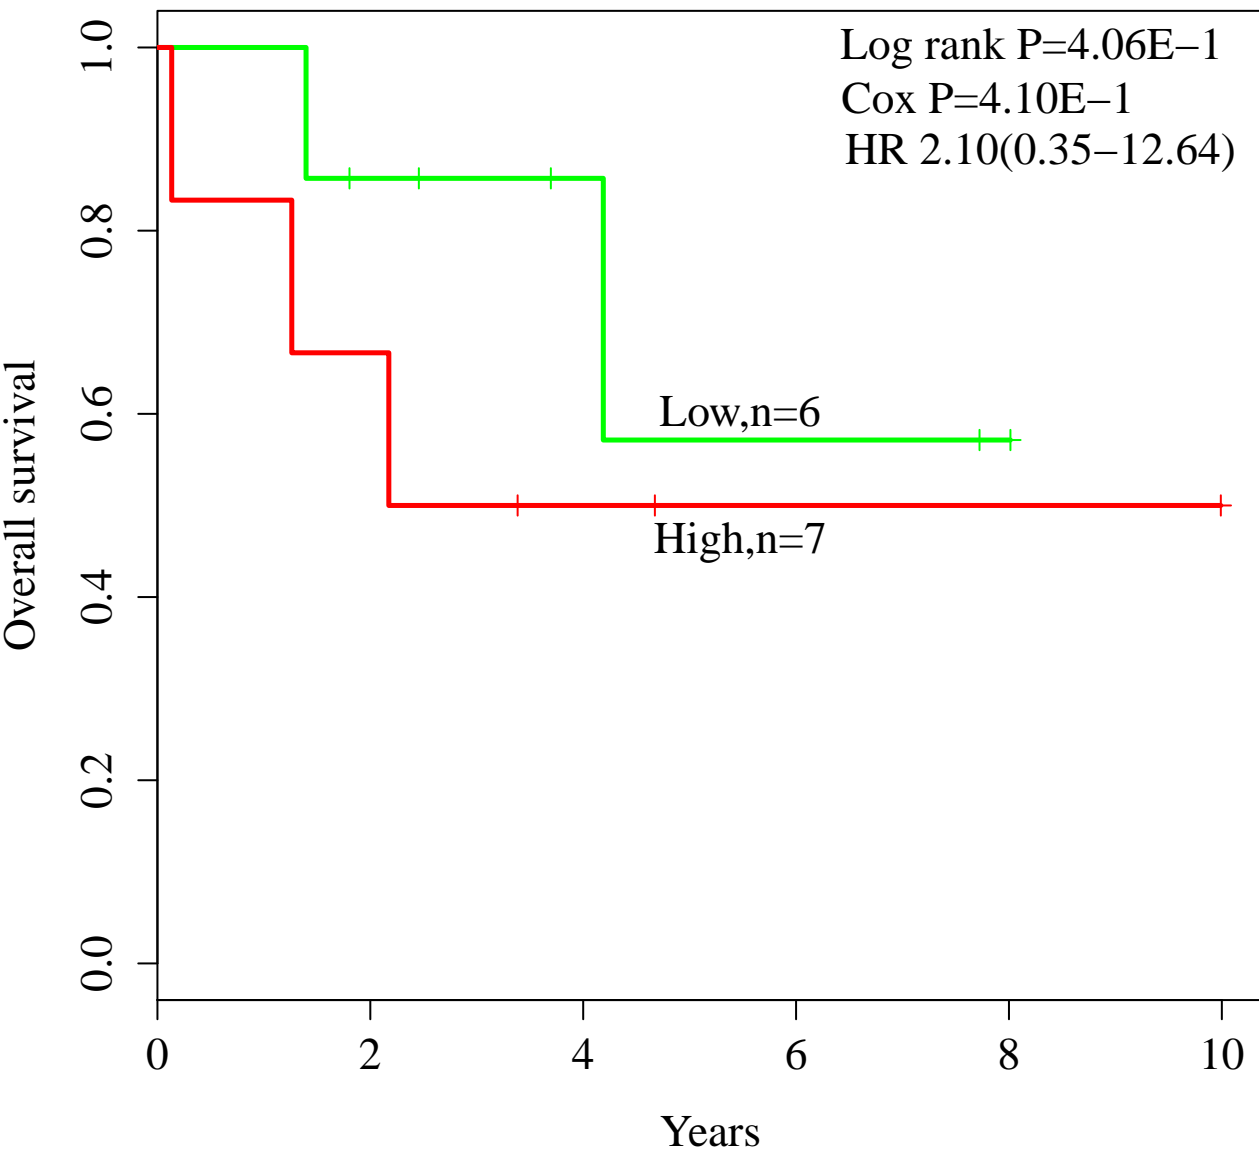

Supplement: c8mo00128f1.zip [file c8mo00128f1.zip]

# CD274 for Low Grade Serous Carcinoma

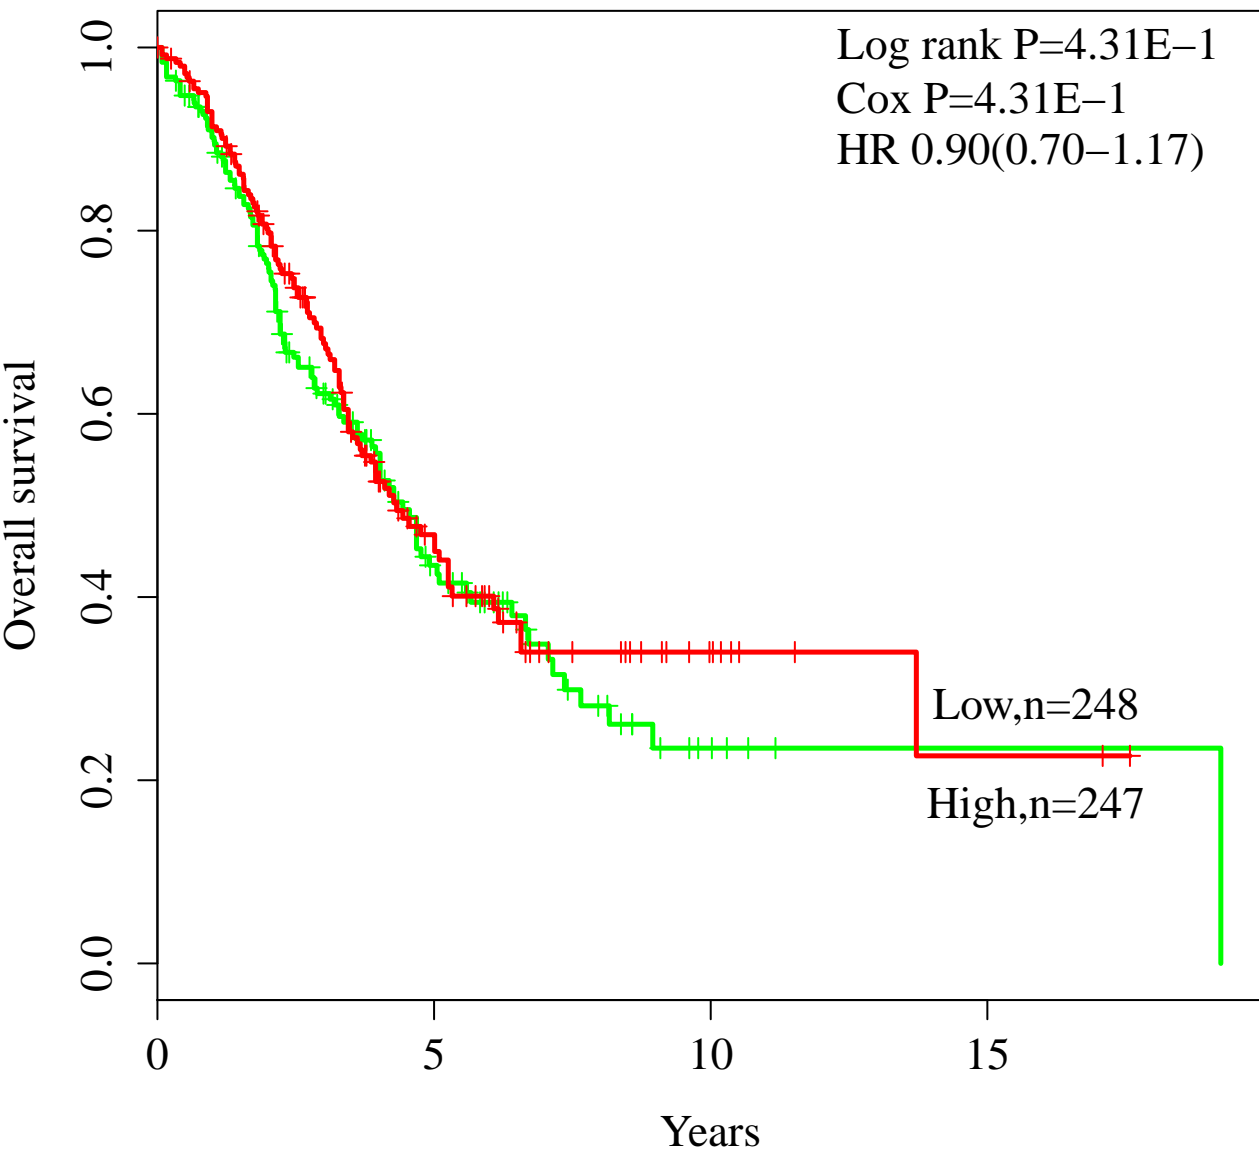

Supplement: c8mo00128f1.zip [file c8mo00128f1.zip]

# PDCD1 for Endometrioid Carcinoma

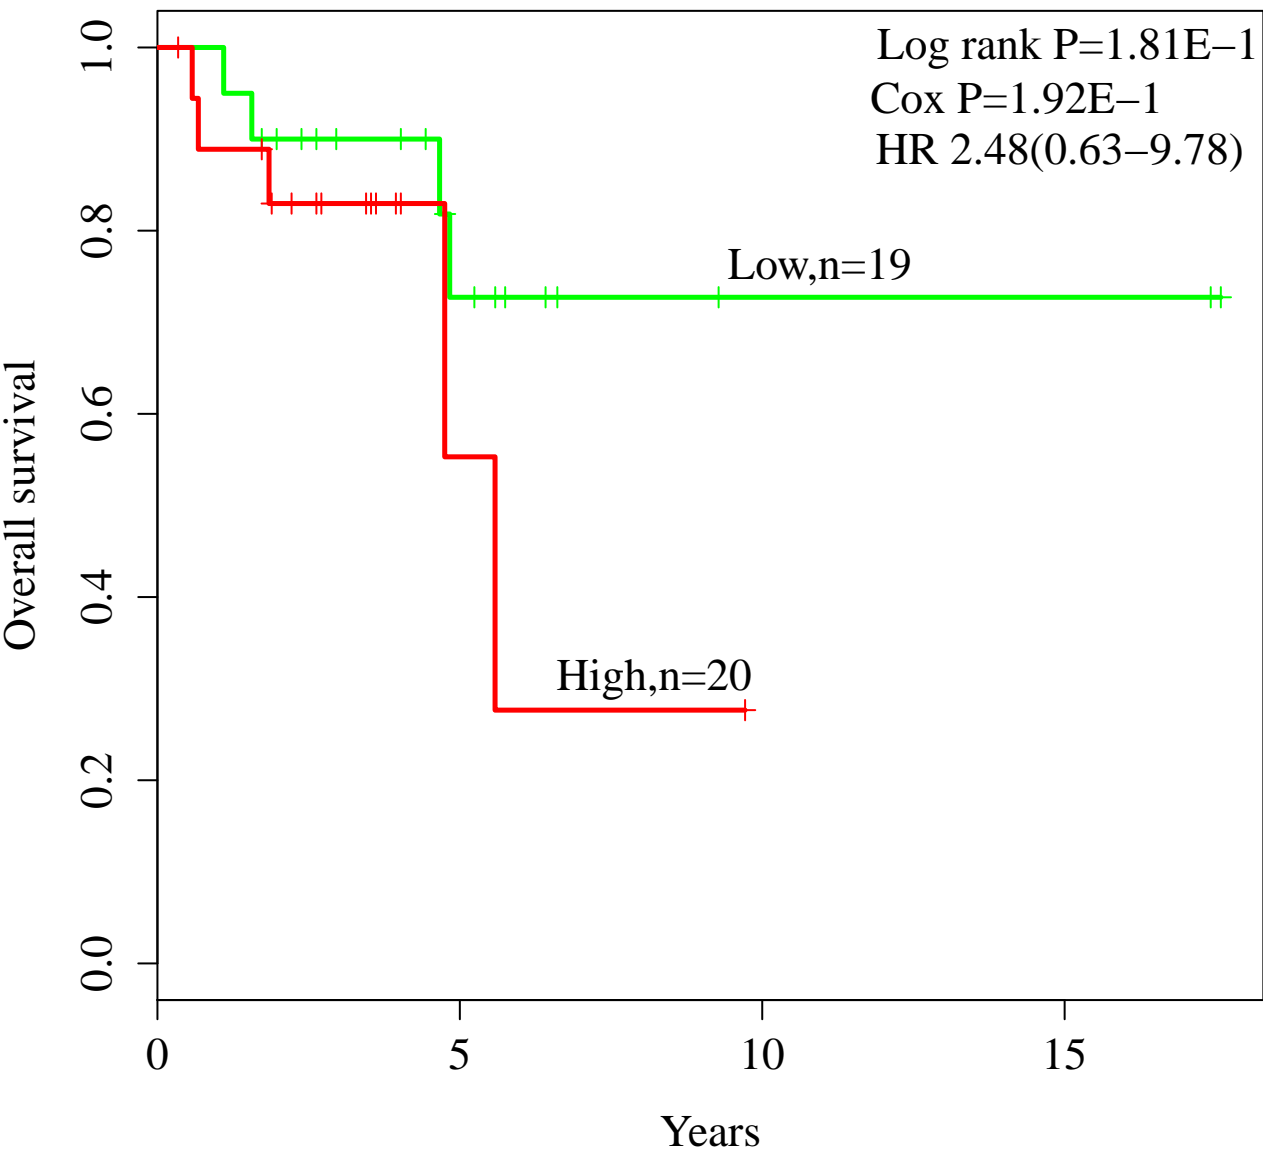

Supplement: c8mo00128f1.zip [file c8mo00128f1.zip]

# PDCD1 for Mucinous Carcinoma

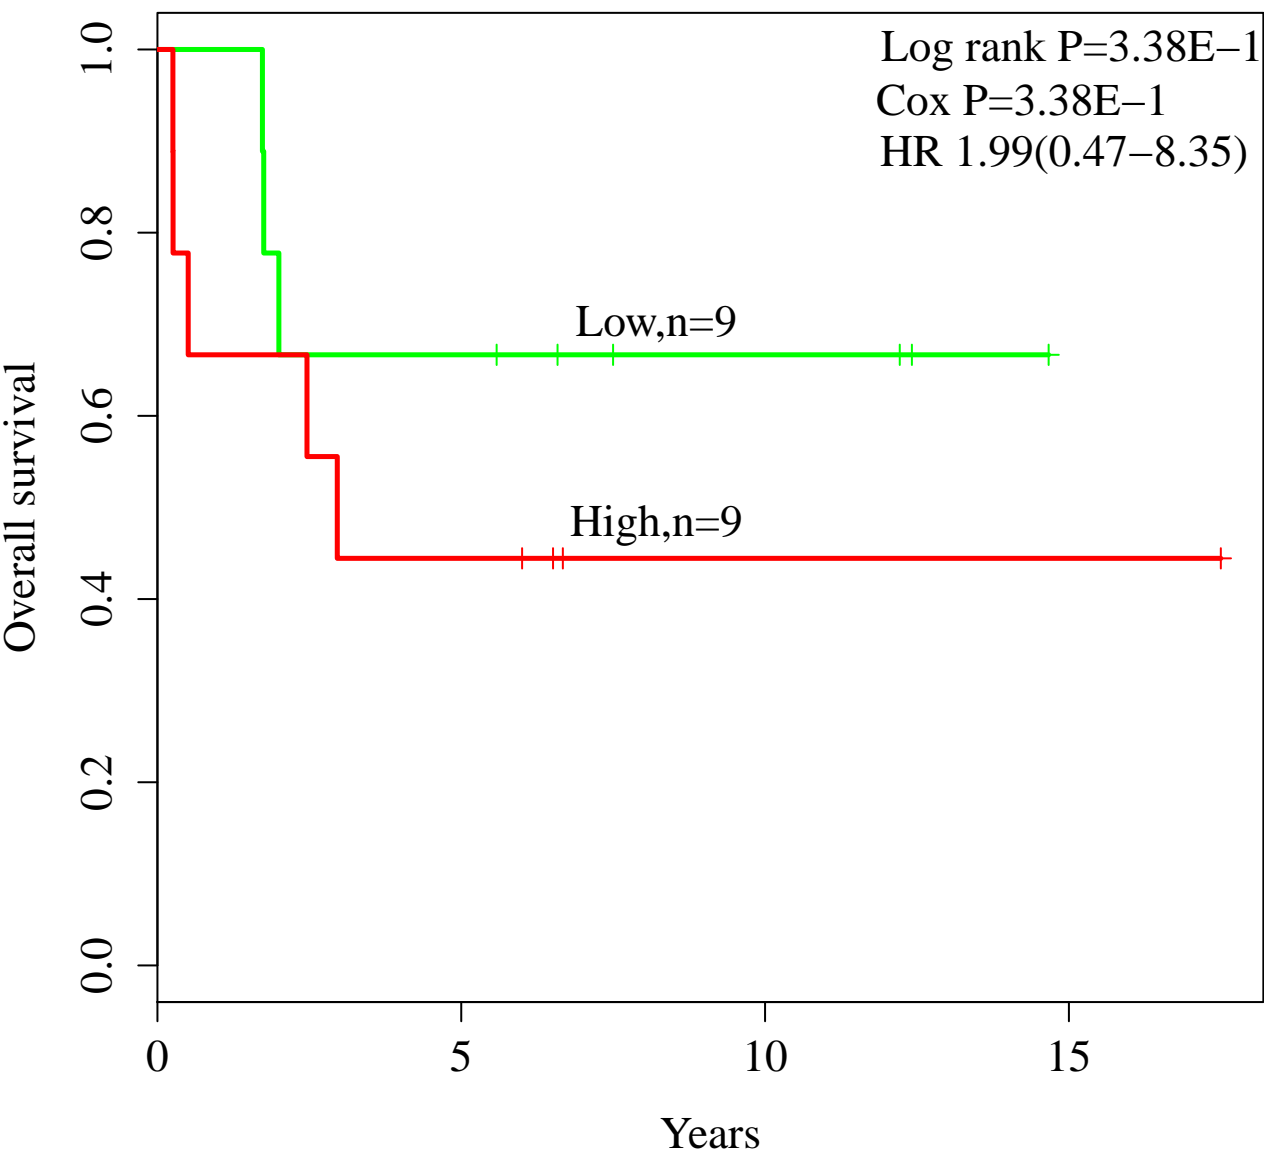

Supplement: c8mo00128f1.zip [file c8mo00128f1.zip]

# HLA-B for Endometrioid Carcinoma

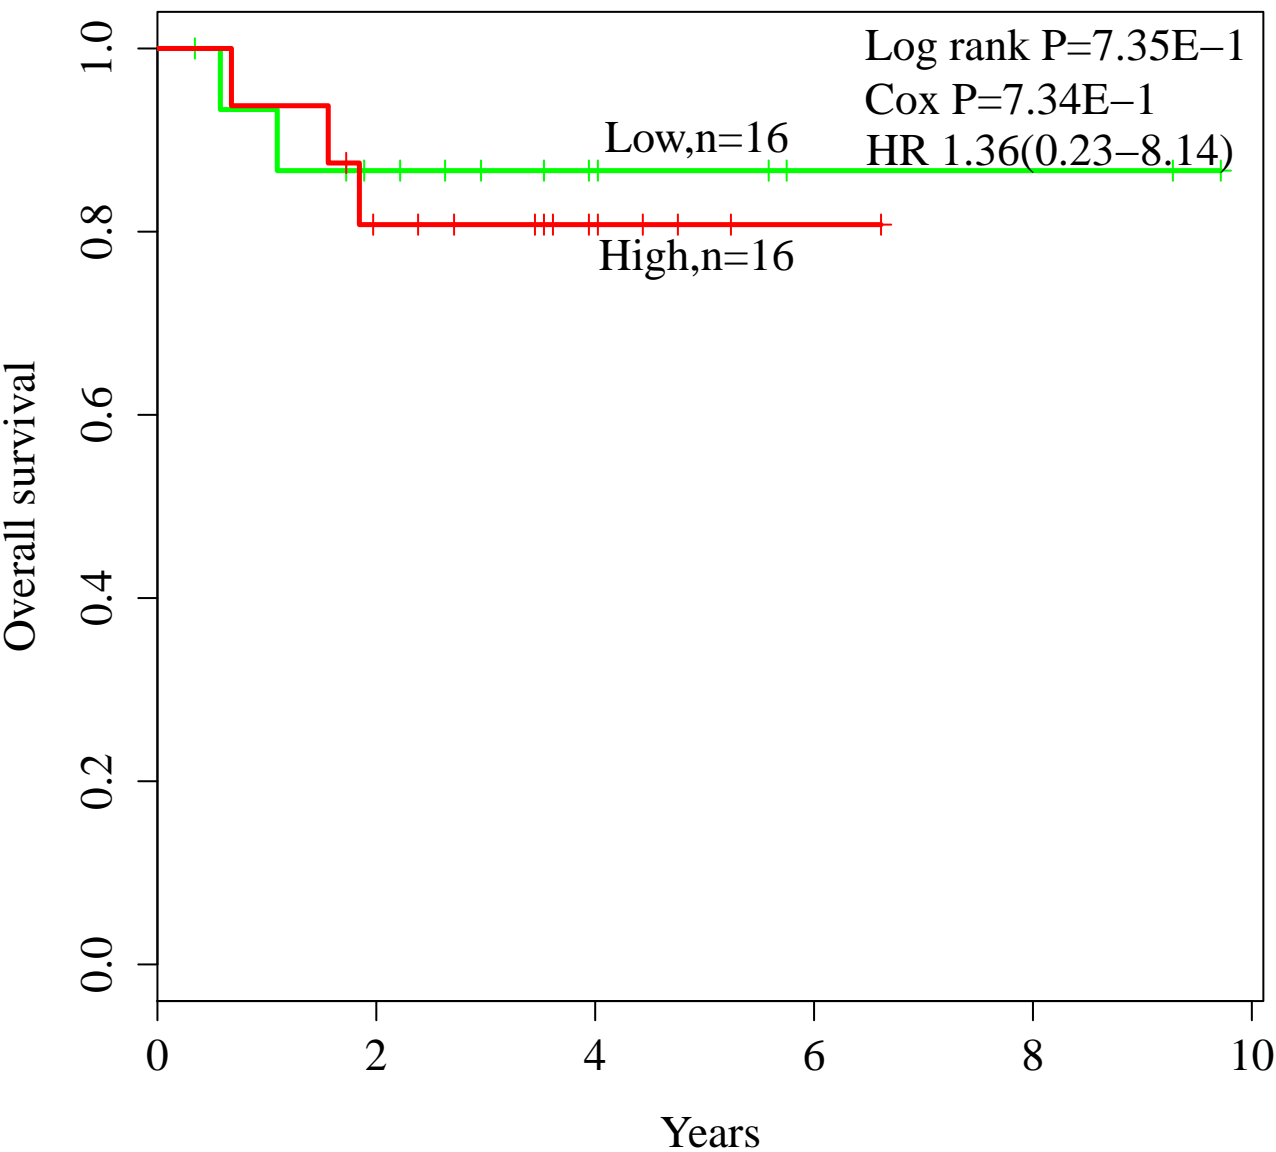

Supplement: c8mo00128f1.zip [file c8mo00128f1.zip]

# CD8A for High Grade Serous Carcinoma

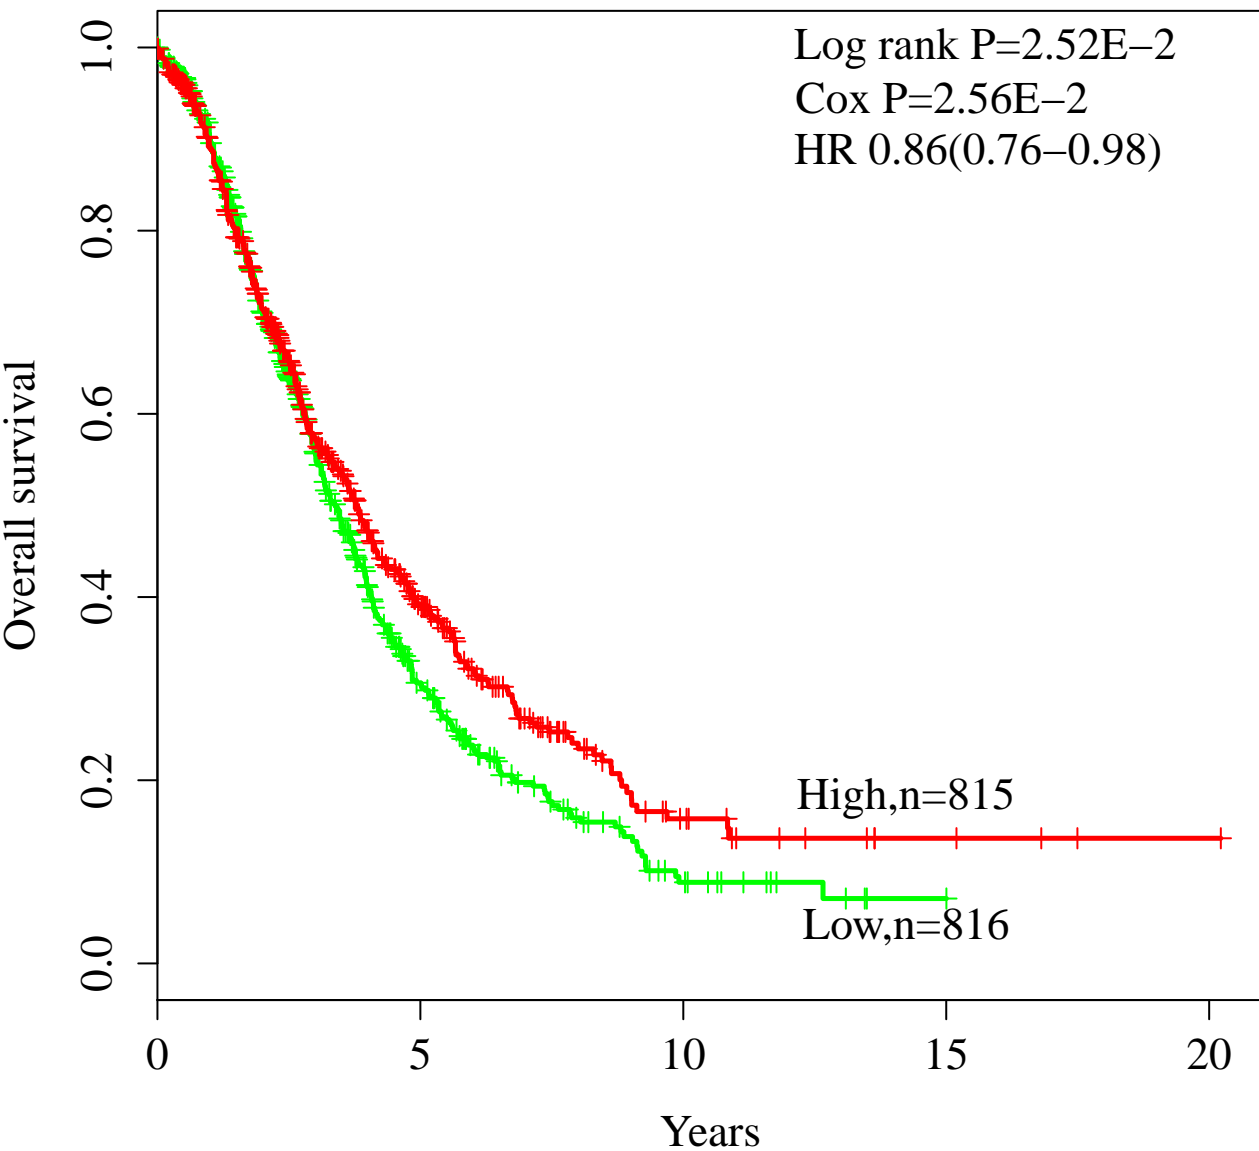

Supplement: c8mo00128f1.zip [file c8mo00128f1.zip]

# IRF1 for Low Grade Serous Carcinoma

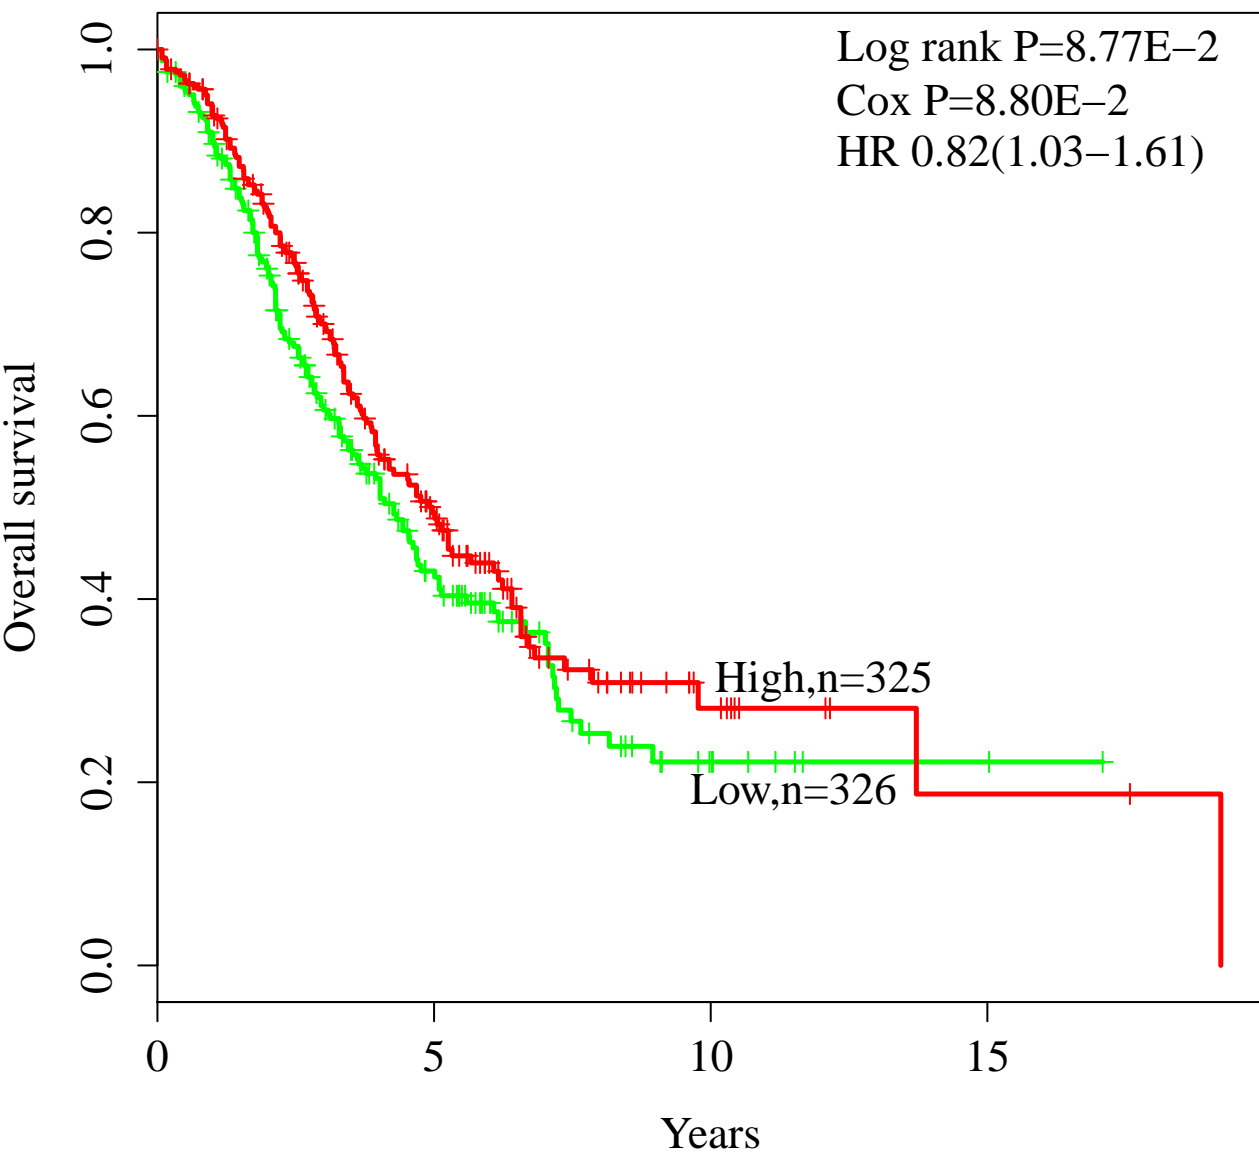

Supplement: c8mo00128f1.zip [file c8mo00128f1.zip]

# GZMA for Clear Cell Carcinoma

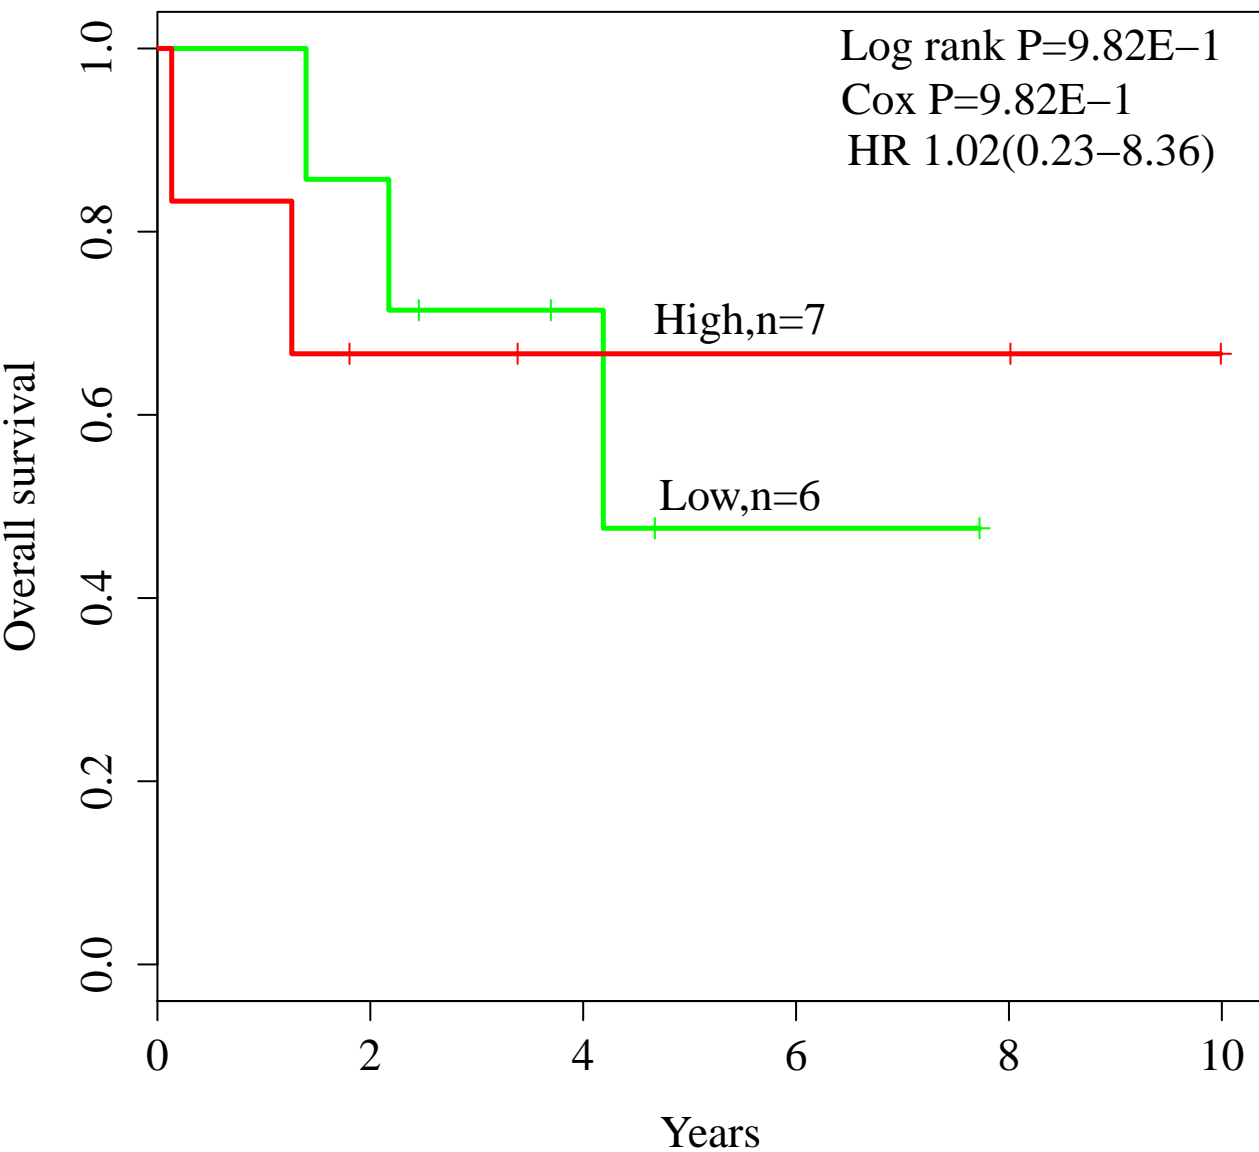

Supplement: c8mo00128f1.zip [file c8mo00128f1.zip]

# IRF1 for Endometrioid Carcinoma

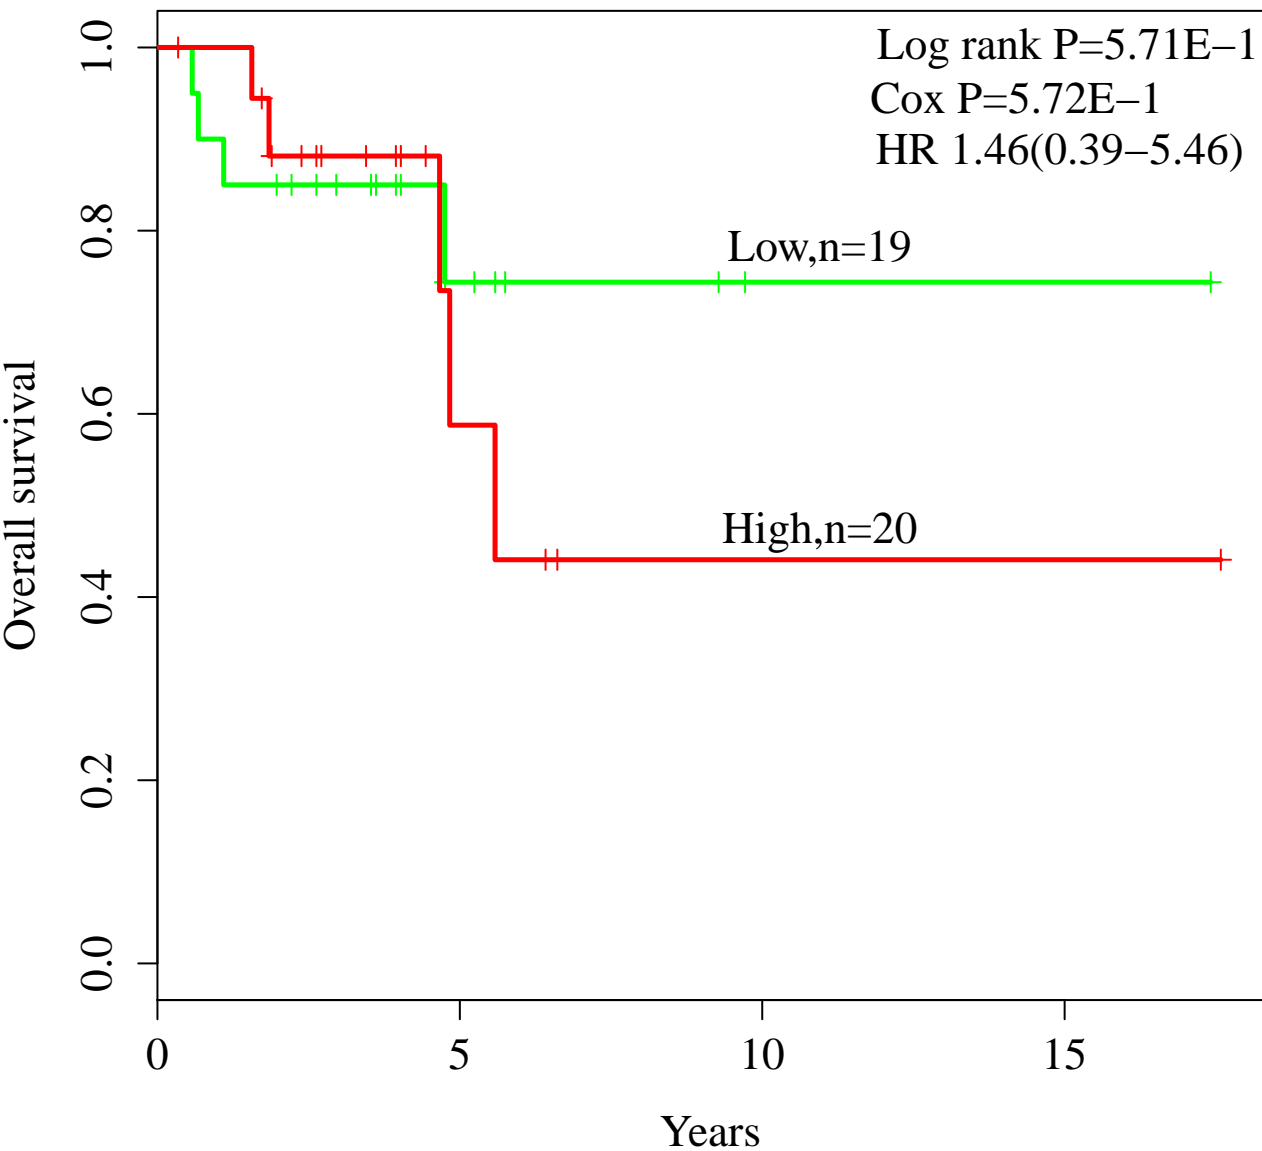

Supplement: c8mo00128f1.zip [file c8mo00128f1.zip]

# HLA-C for Endometrioid Carcinoma

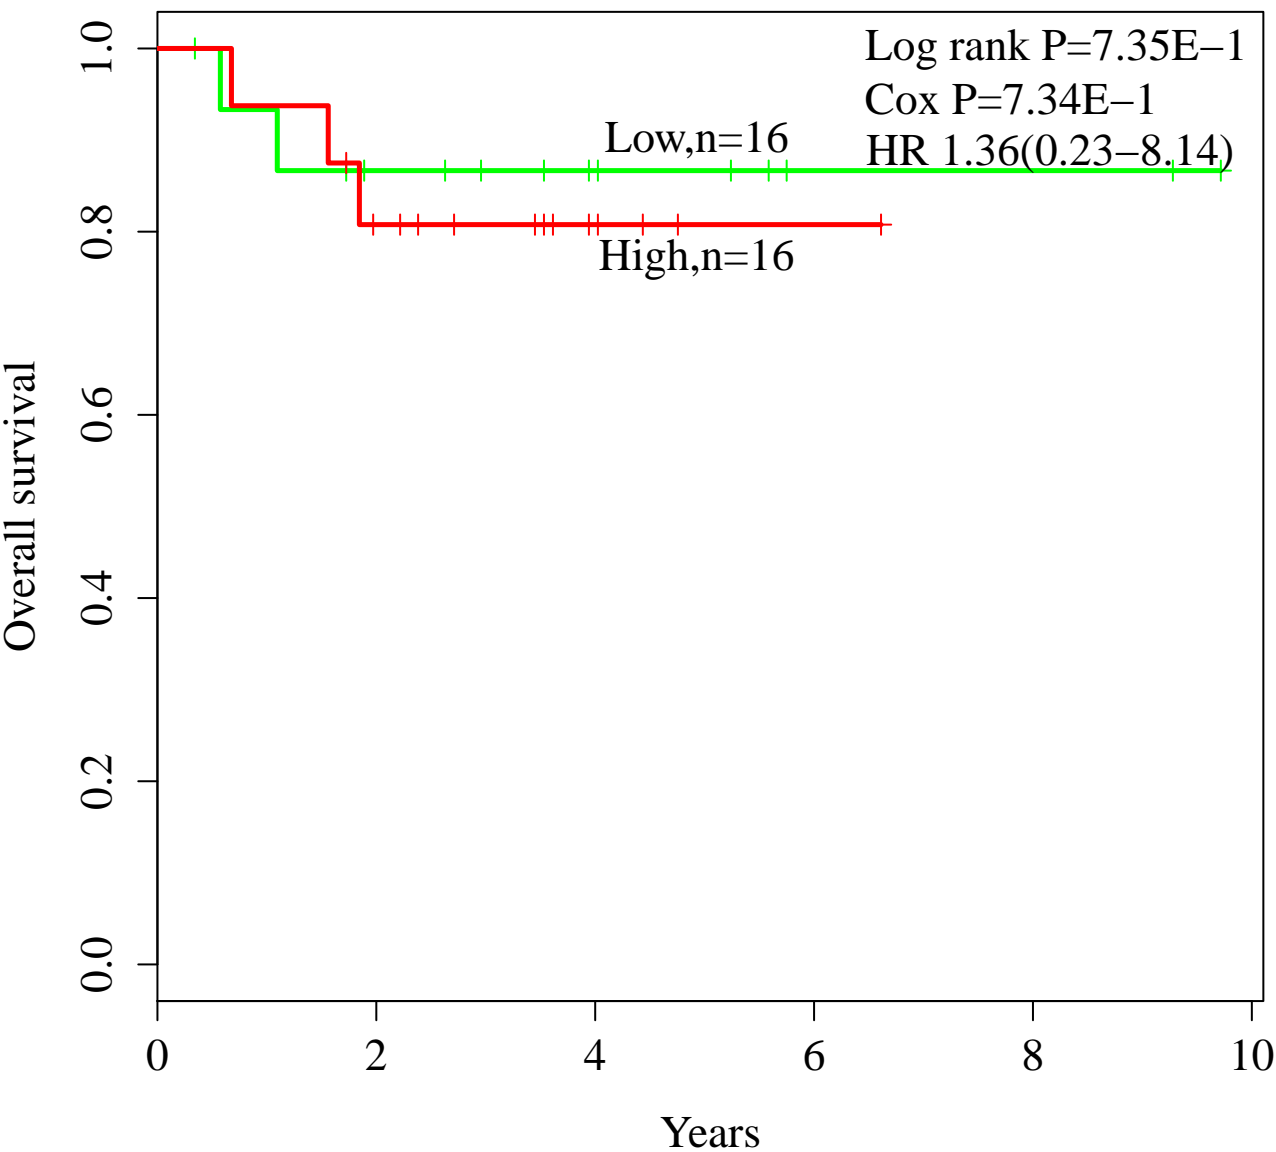

Supplement: c8mo00128f1.zip [file c8mo00128f1.zip]

# CD274 for Clear Cell Carcinoma

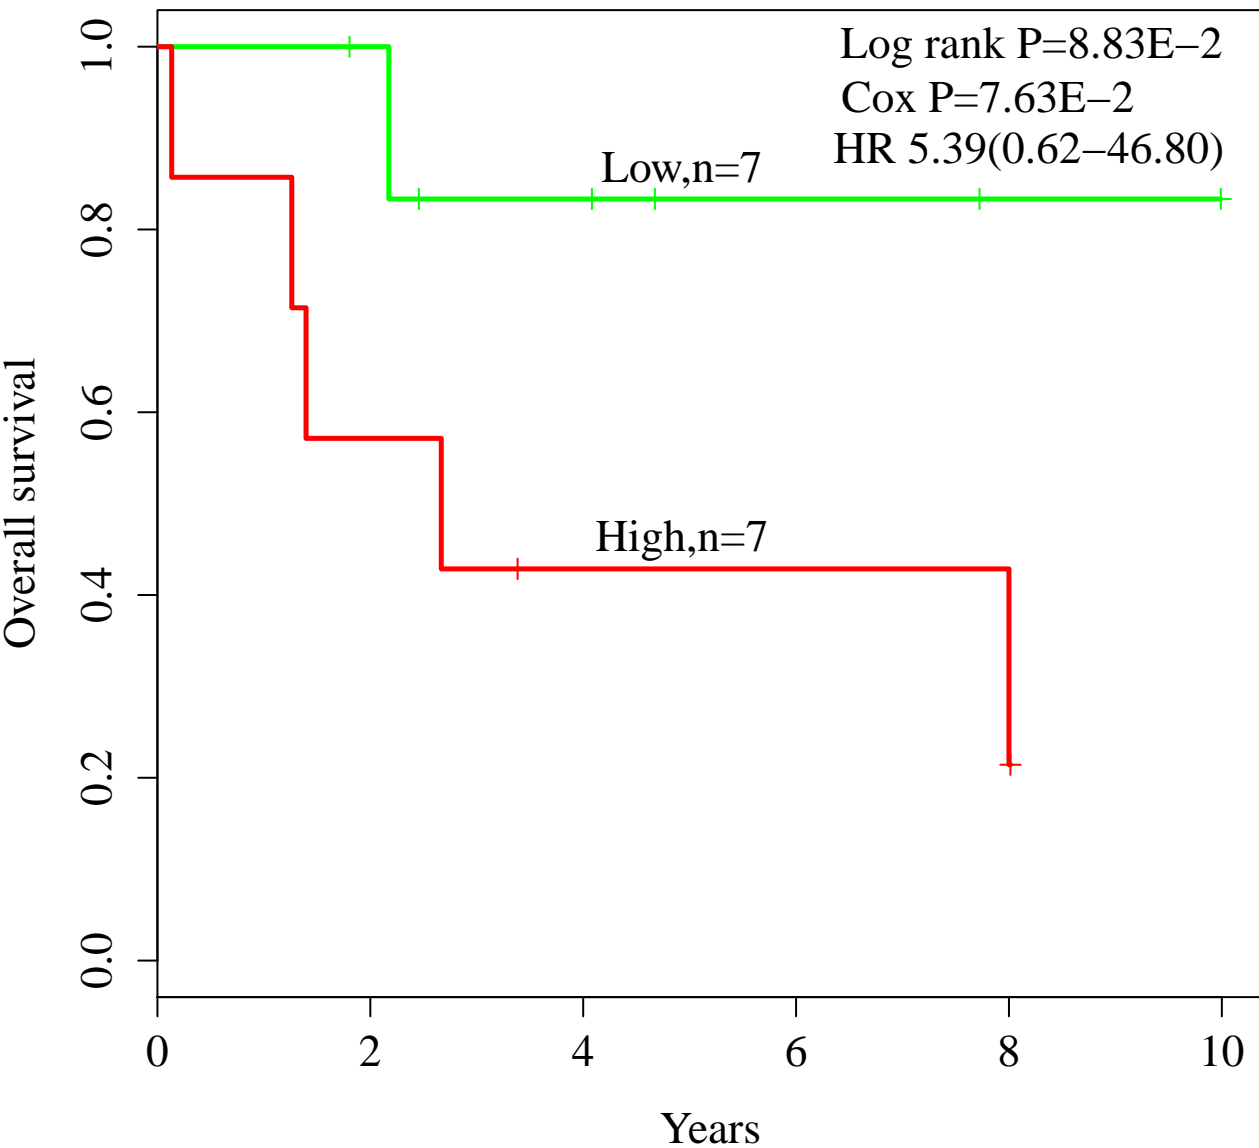

Supplement: c8mo00128f1.zip [file c8mo00128f1.zip]

# PRF1 for Endometrioid Carcinoma

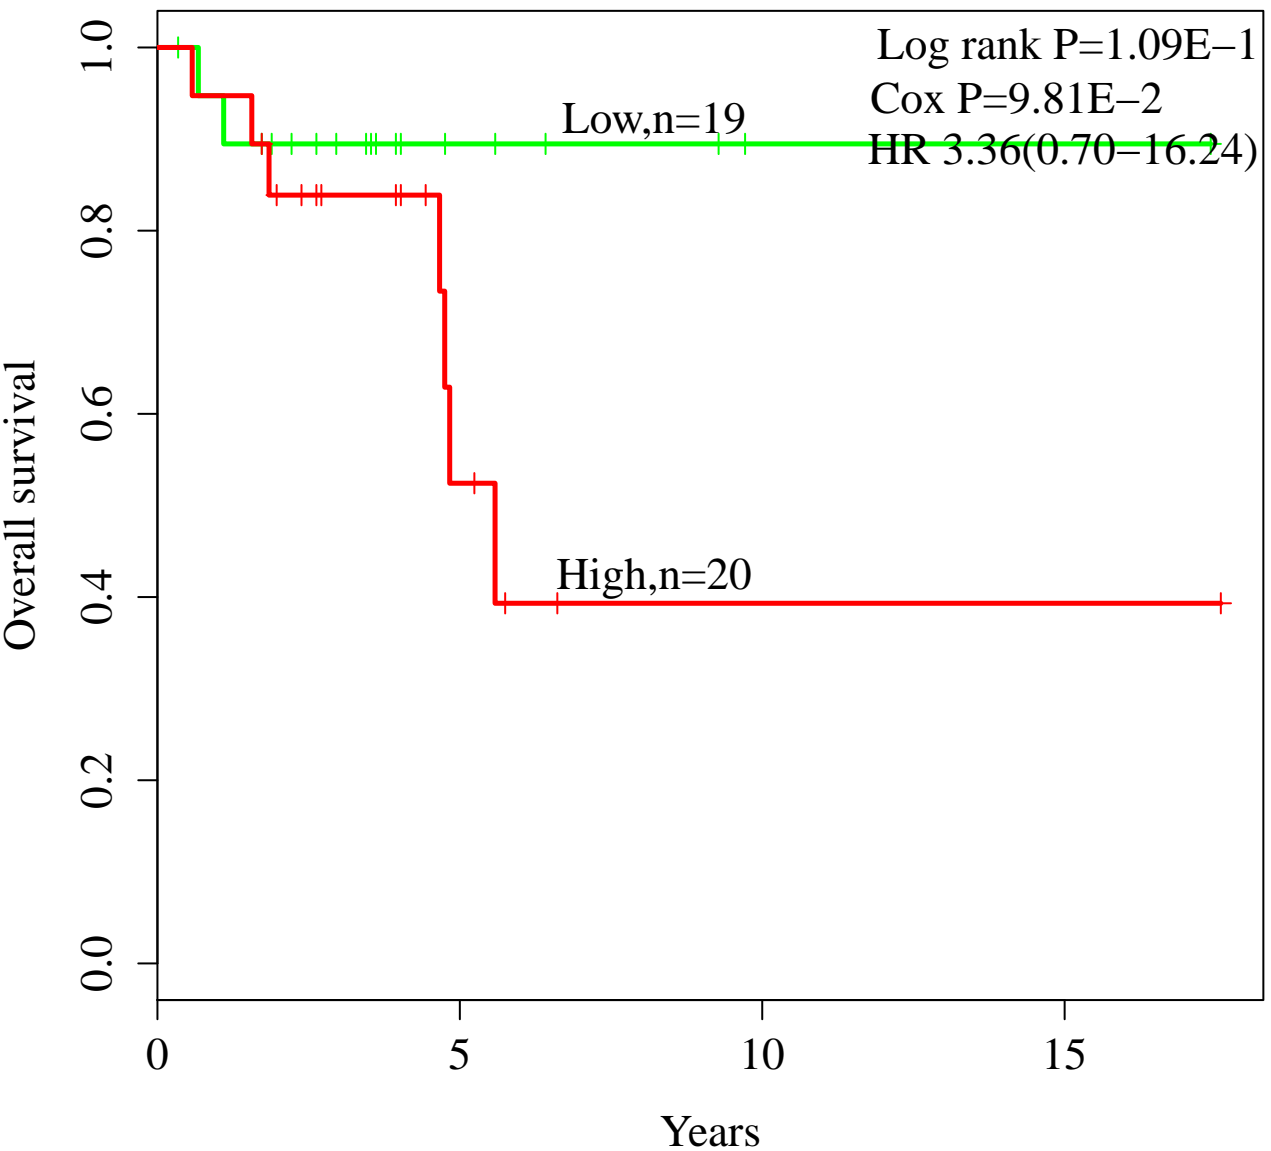

Supplement: c8mo00128f1.zip [file c8mo00128f1.zip]

# HLA-C for Mucinous Carcinoma

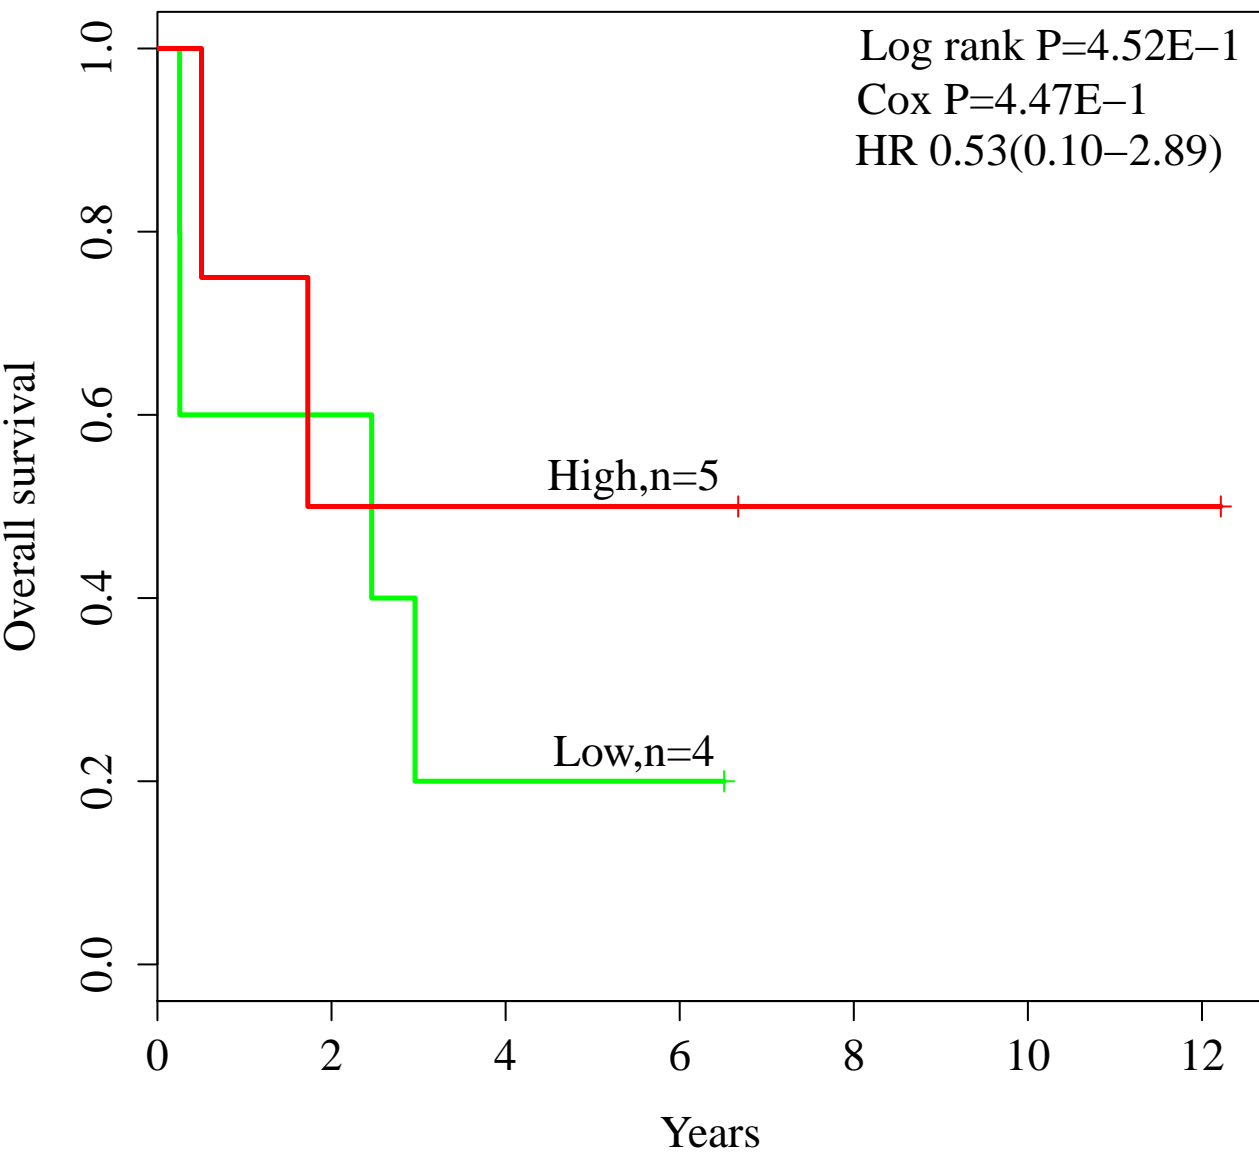

Supplement: c8mo00128f1.zip [file c8mo00128f1.zip]

# CD163 for High Grade Serous Carcinoma

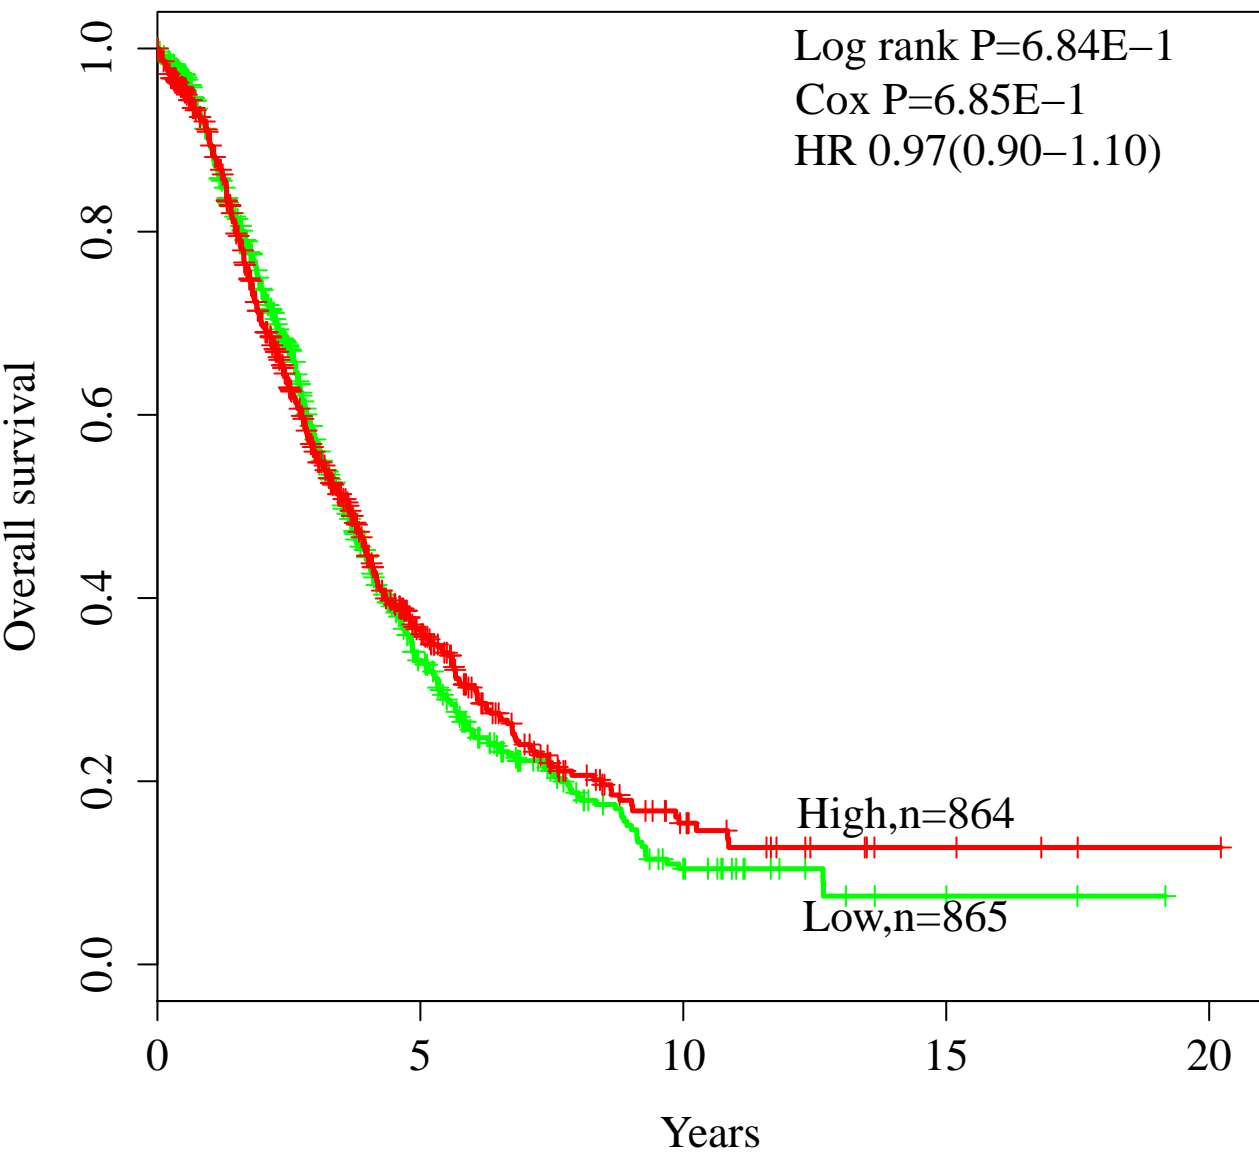

Supplement: c8mo00128f1.zip [file c8mo00128f1.zip]

# HLA-C for Clear Cell Carcinoma

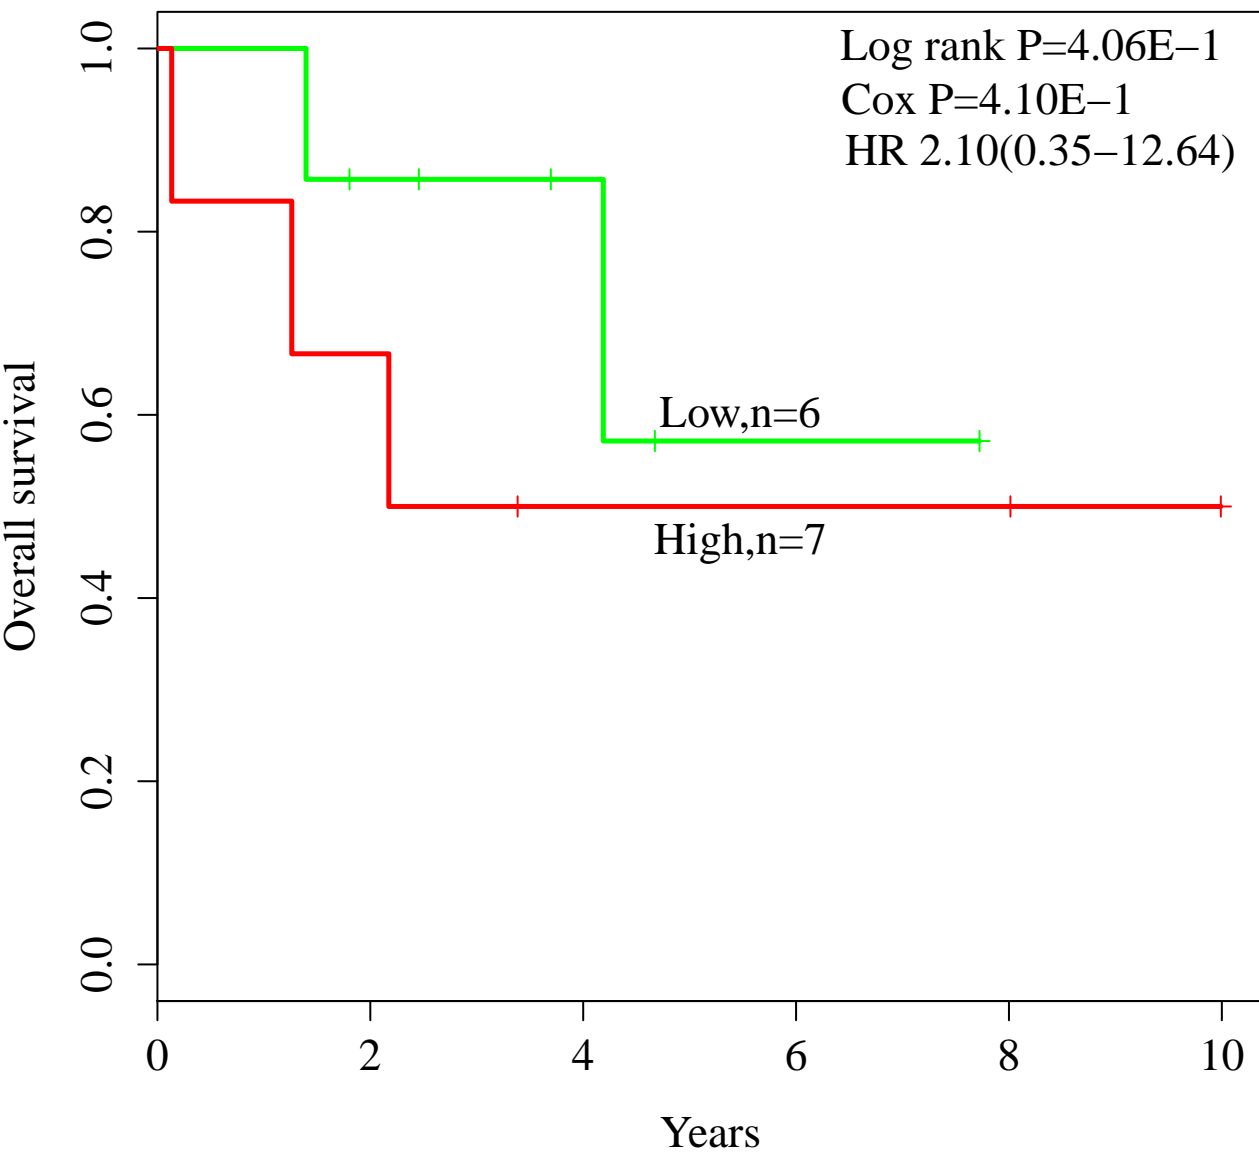

Supplement: c8mo00128f1.zip [file c8mo00128f1.zip]

# HLA-C for High Grade Serous Carcinoma

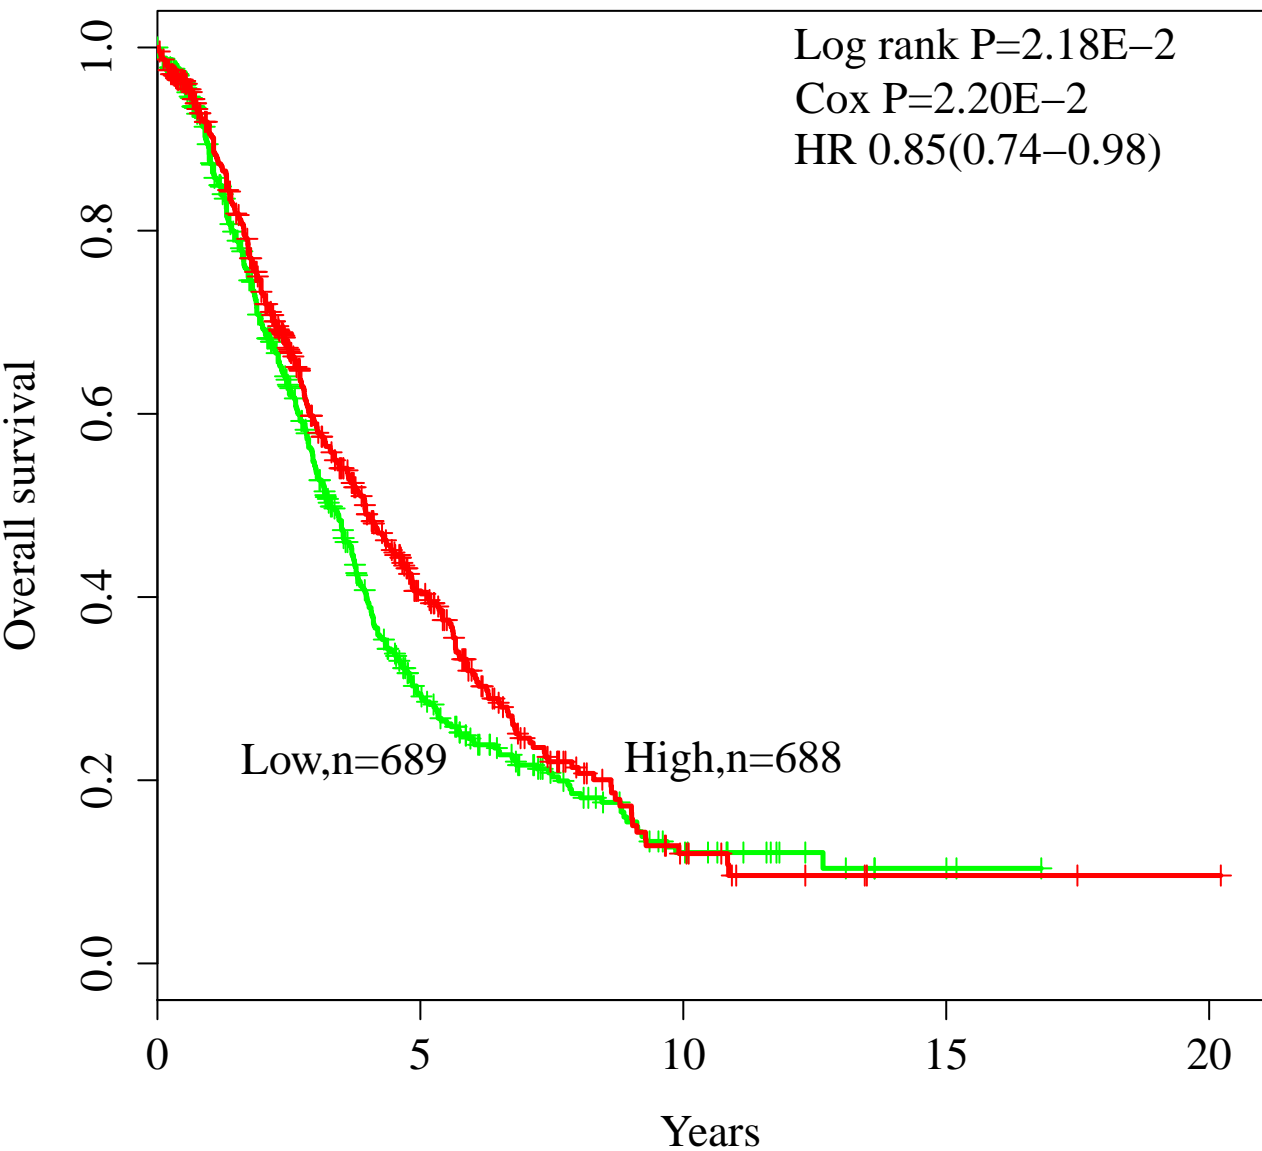

Supplement: c8mo00128f1.zip [file c8mo00128f1.zip]

# CD8B for High Grade Serous Carcinoma

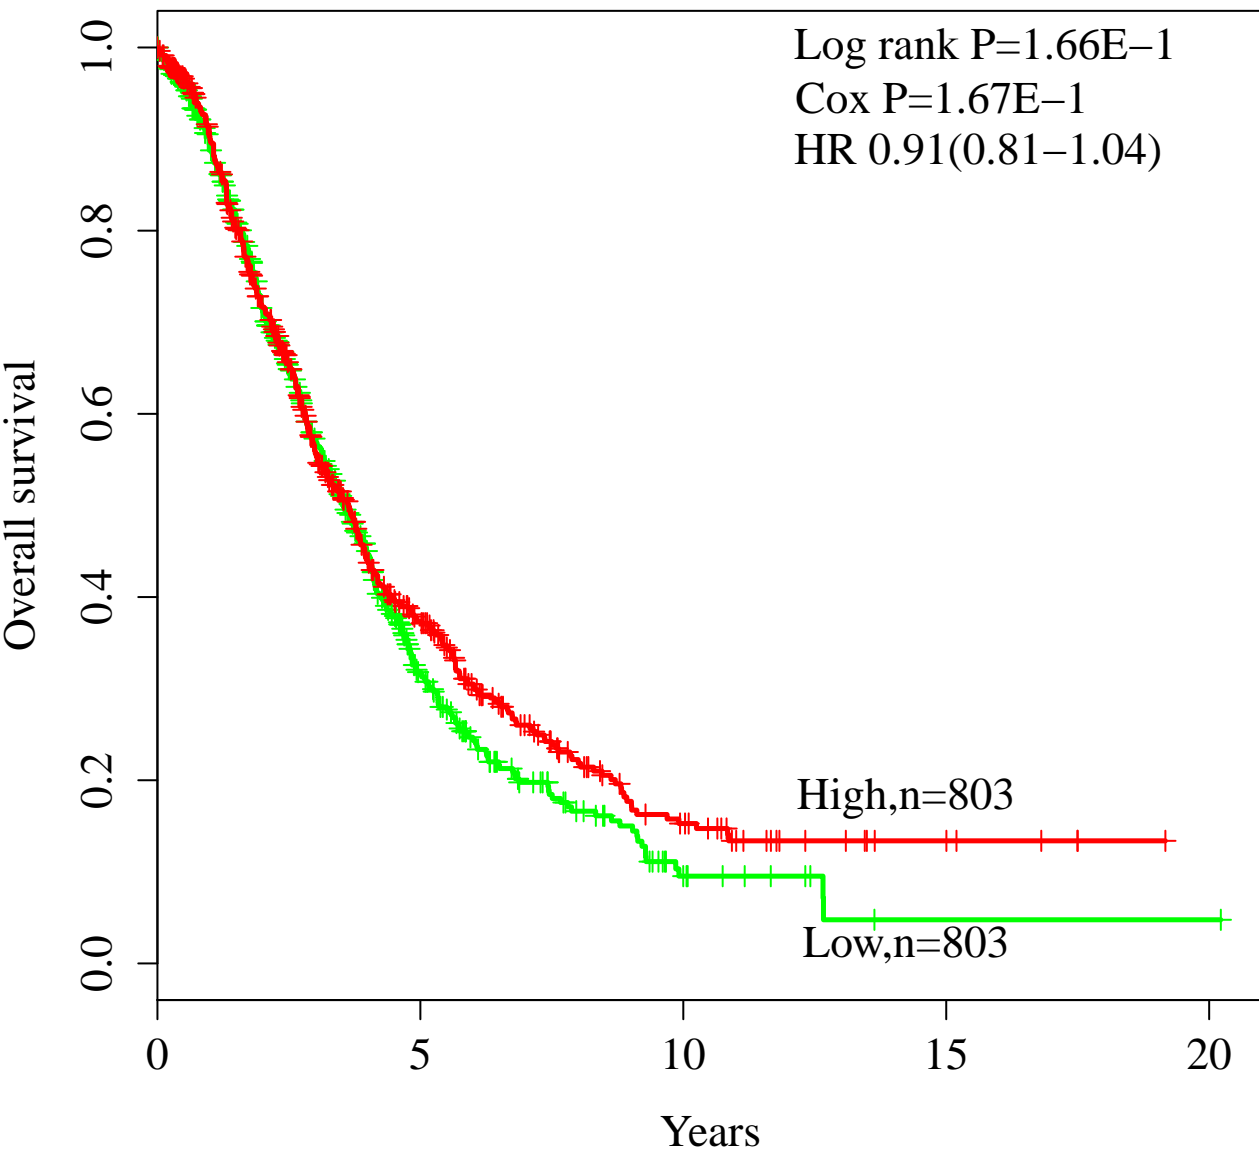

Supplement: c8mo00128f1.zip [file c8mo00128f1.zip]

# HLA-A for Endometrioid Carcinoma

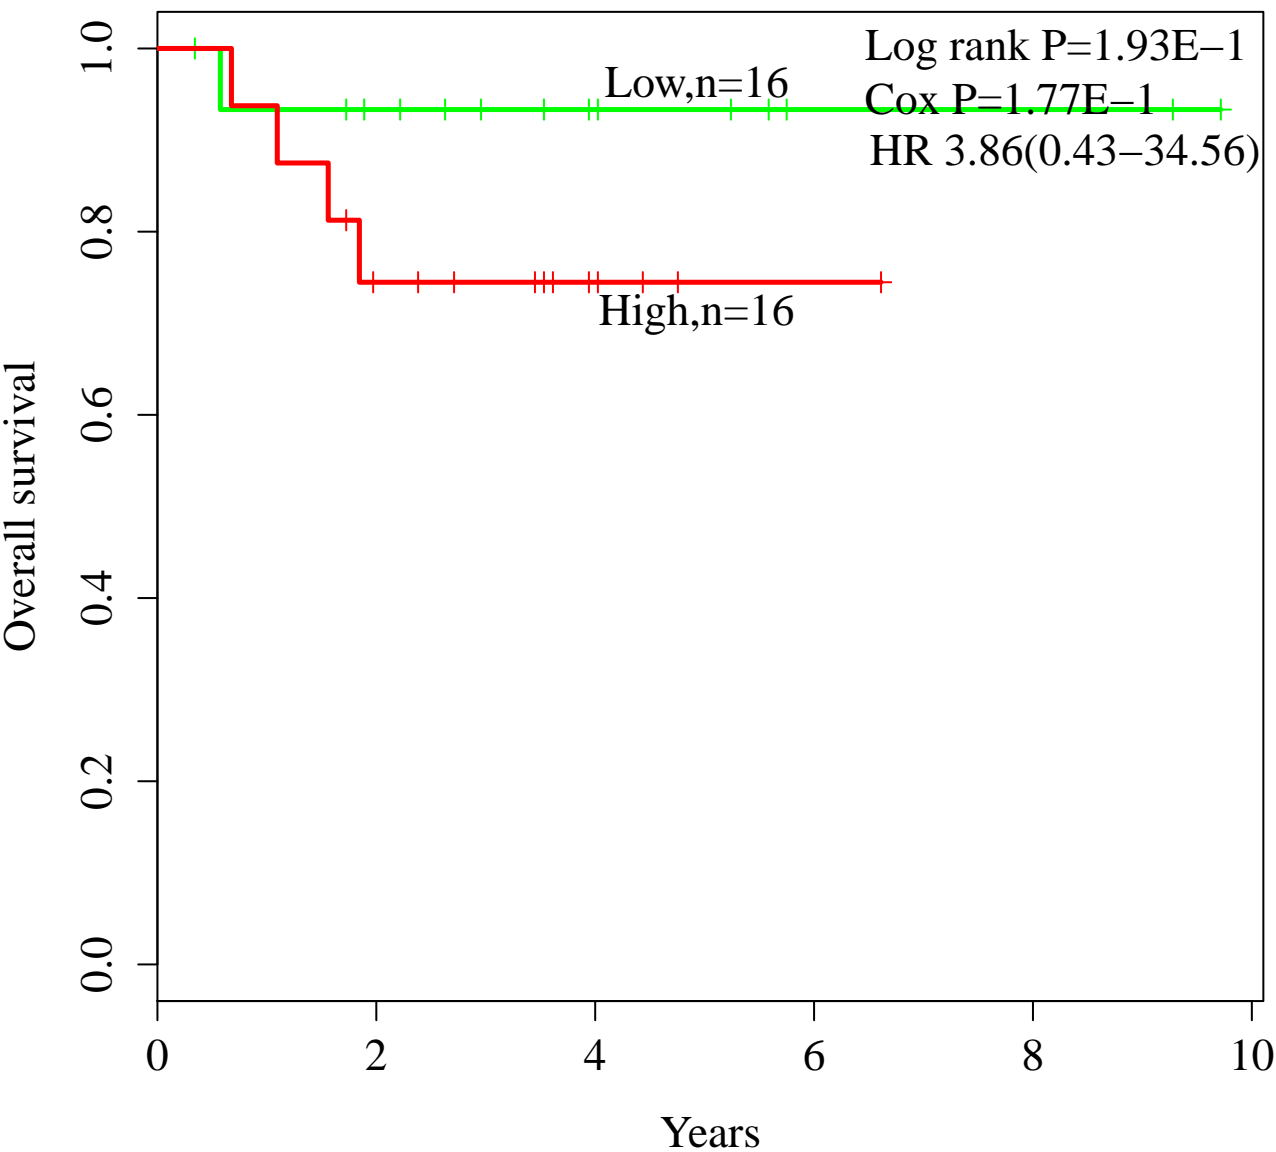

Supplement: c8mo00128f1.zip [file c8mo00128f1.zip]

# HLA-A for Mucinous Carcinomas

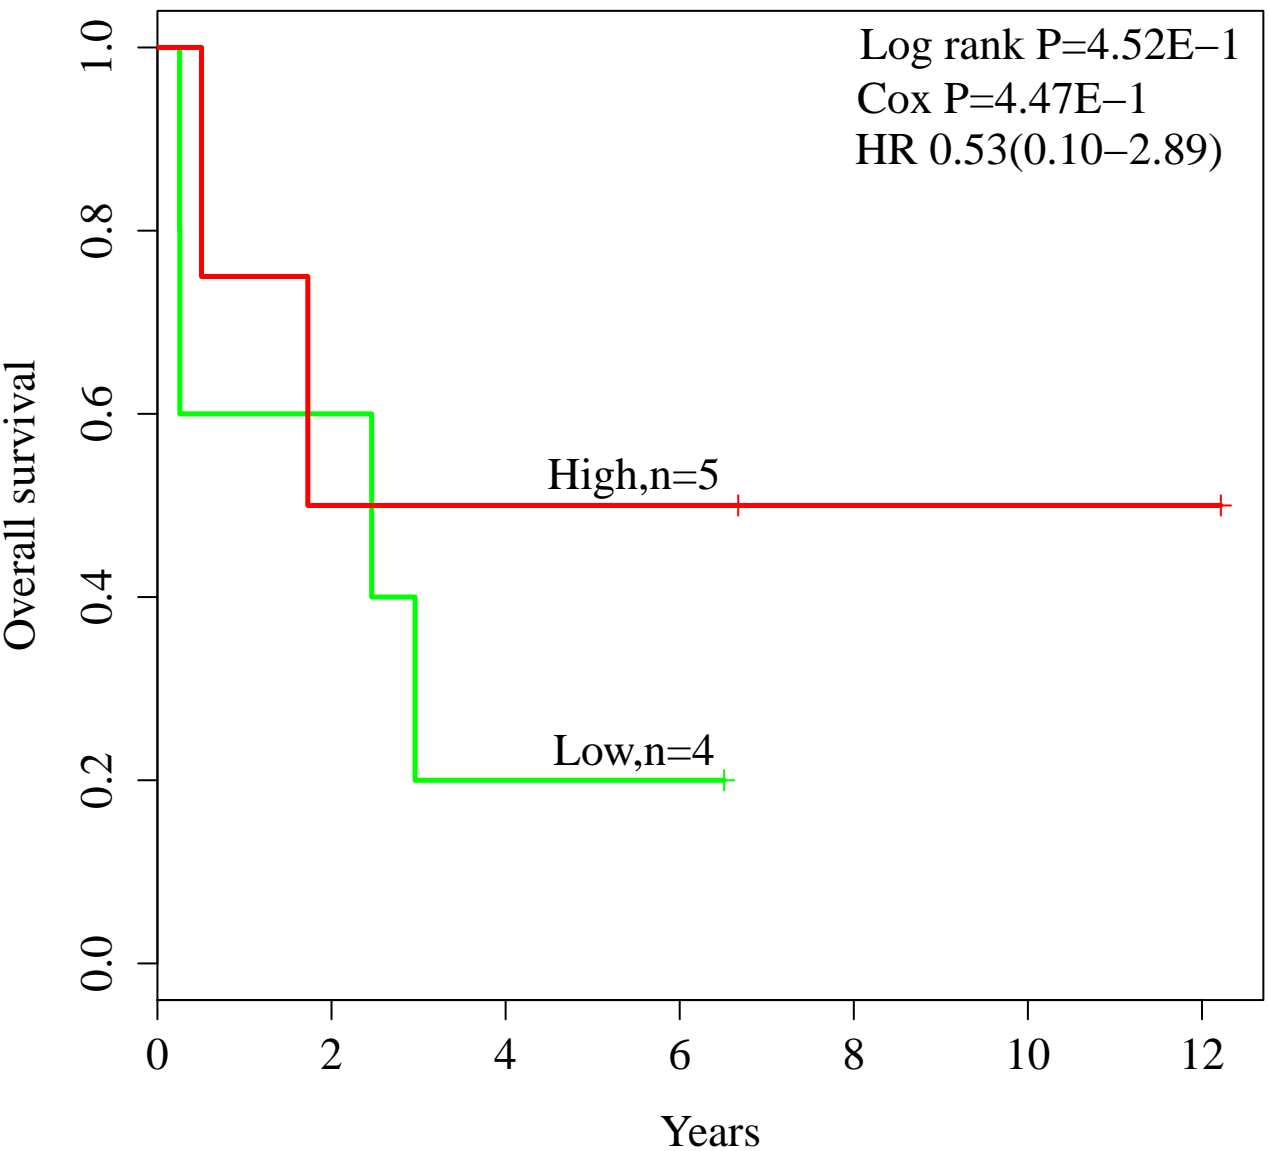

Supplement: c8mo00128f1.zip [file c8mo00128f1.zip]

# CD8B for Clear Cell Carcinoma

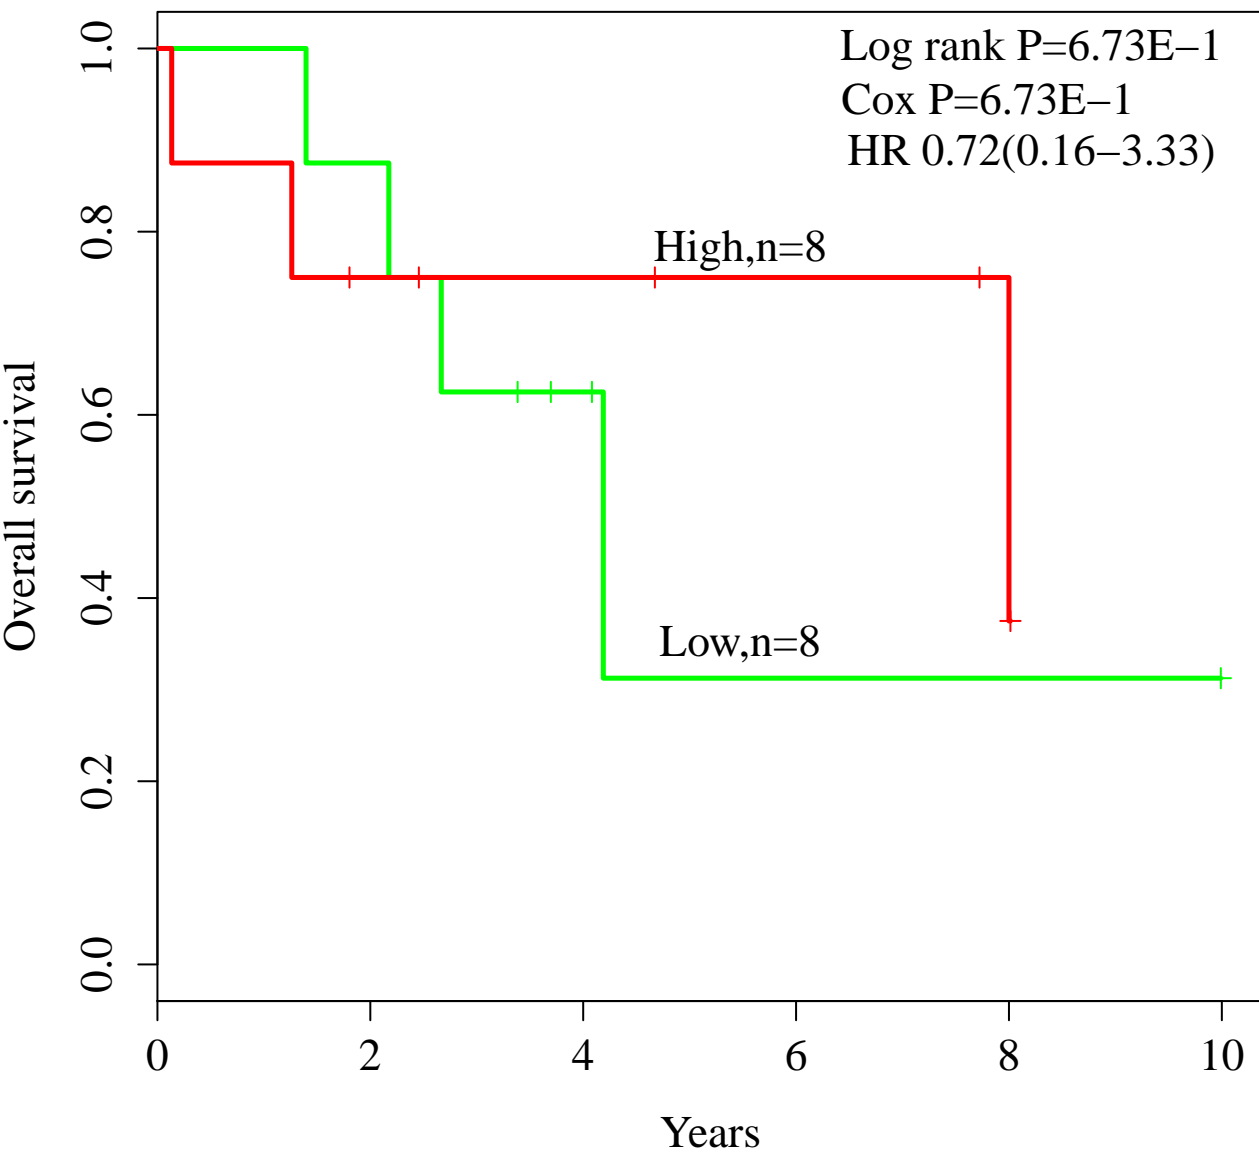

Supplement: c8mo00128f1.zip [file c8mo00128f1.zip]

# GZMA for Low Grade Serous Carcinoma

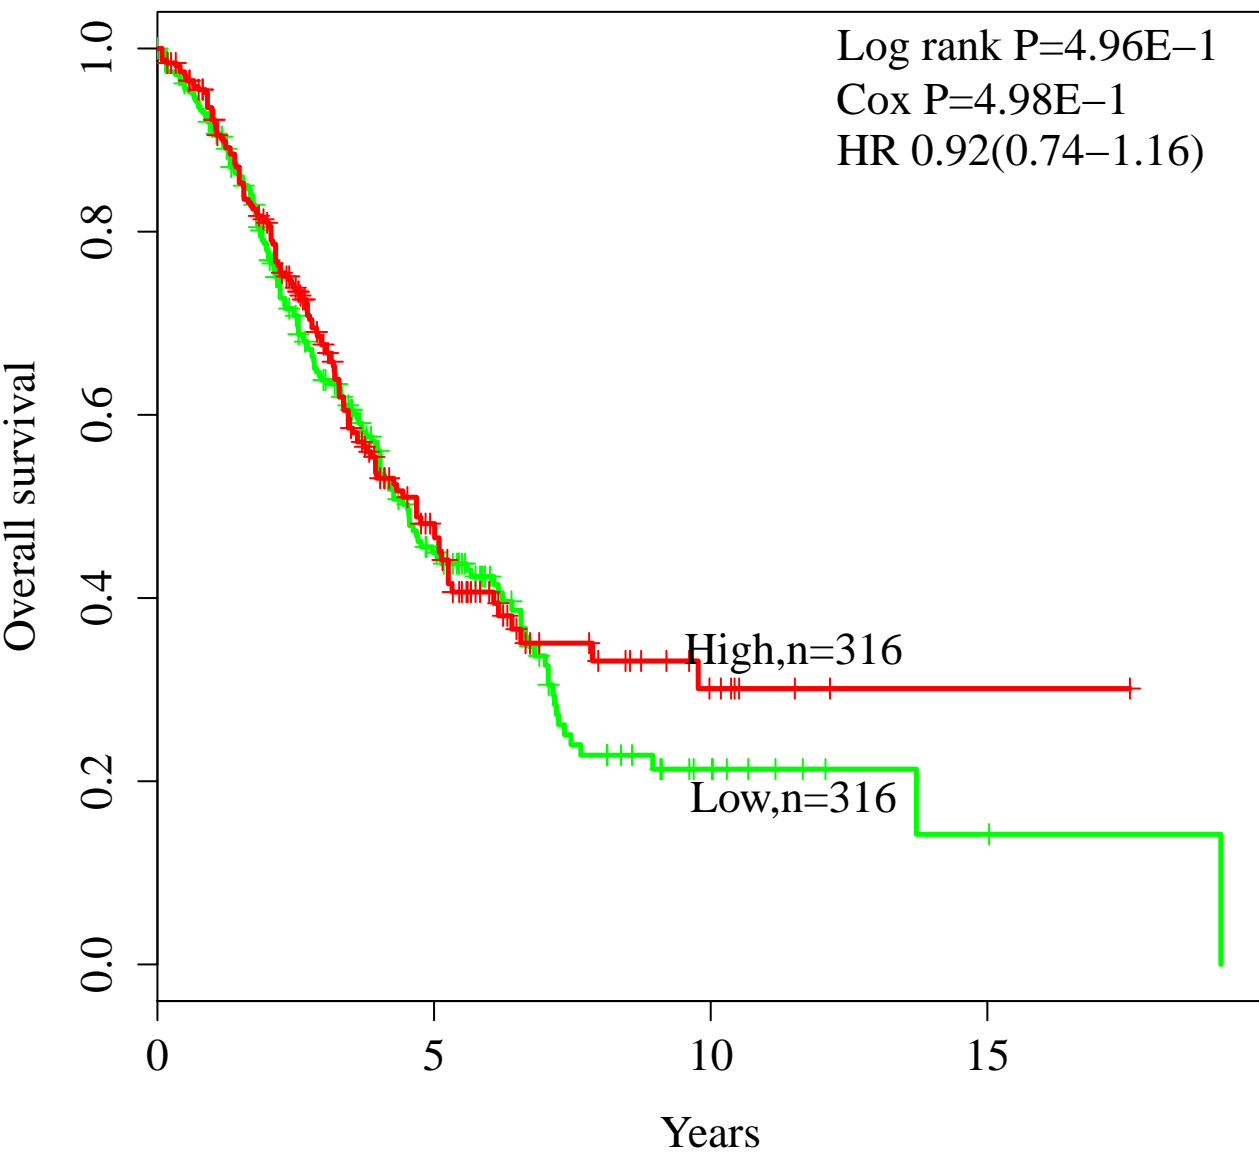

Supplement: c8mo00128f1.zip [file c8mo00128f1.zip]

# IRF1 for Mucinous Carcinoma

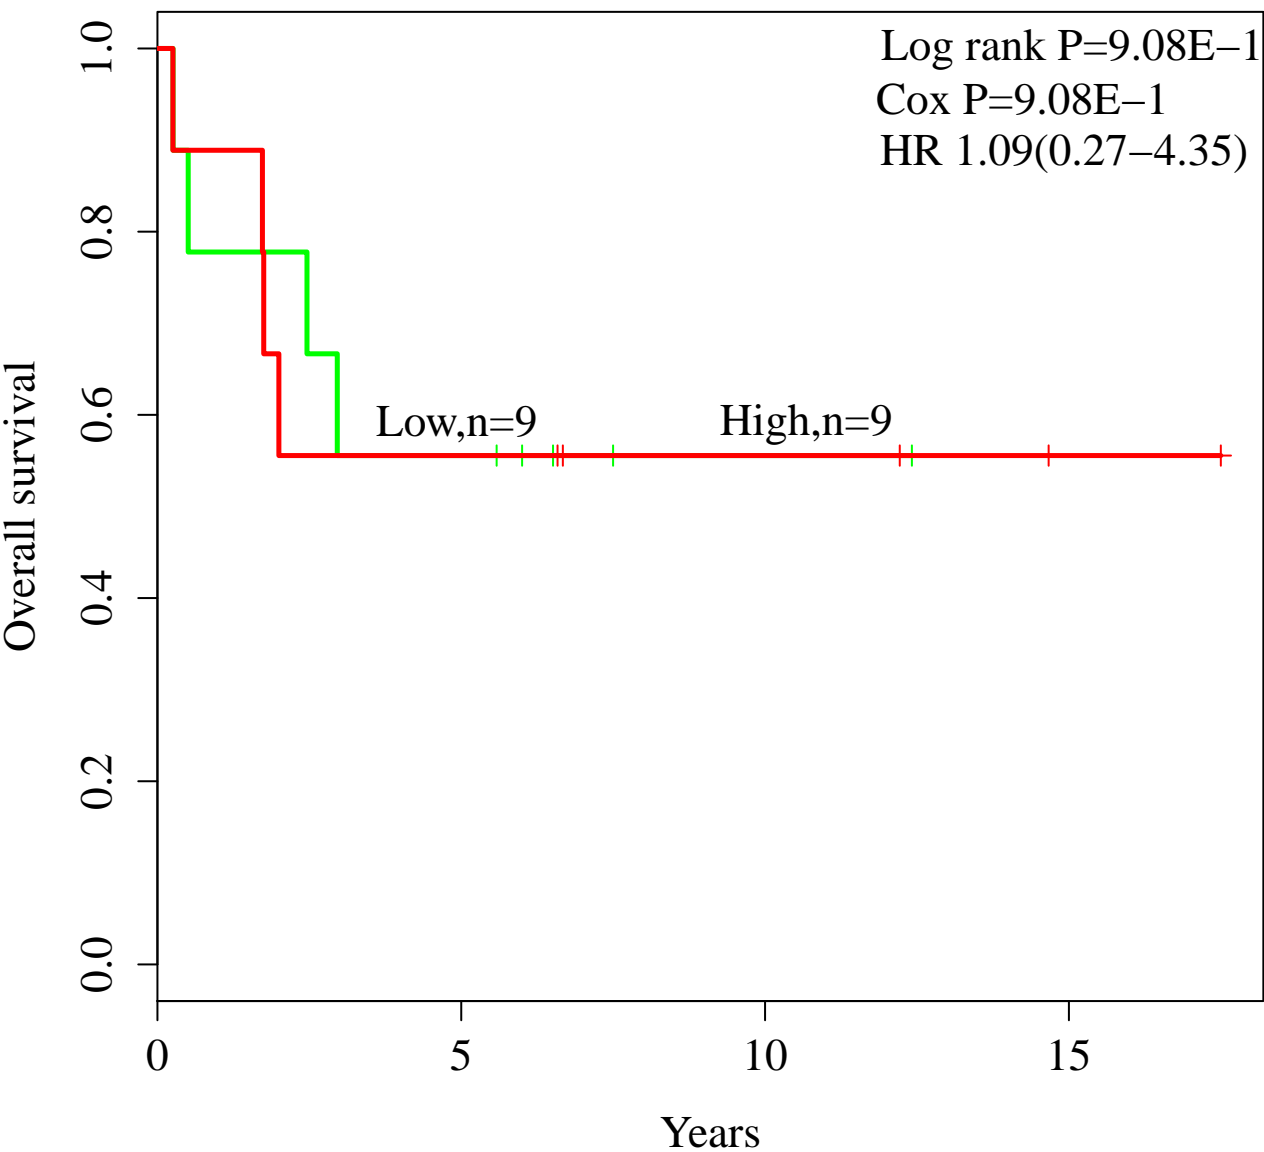

Supplement: c8mo00128f1.zip [file c8mo00128f1.zip]

# IRF1 for Clear Cell Carcinoma

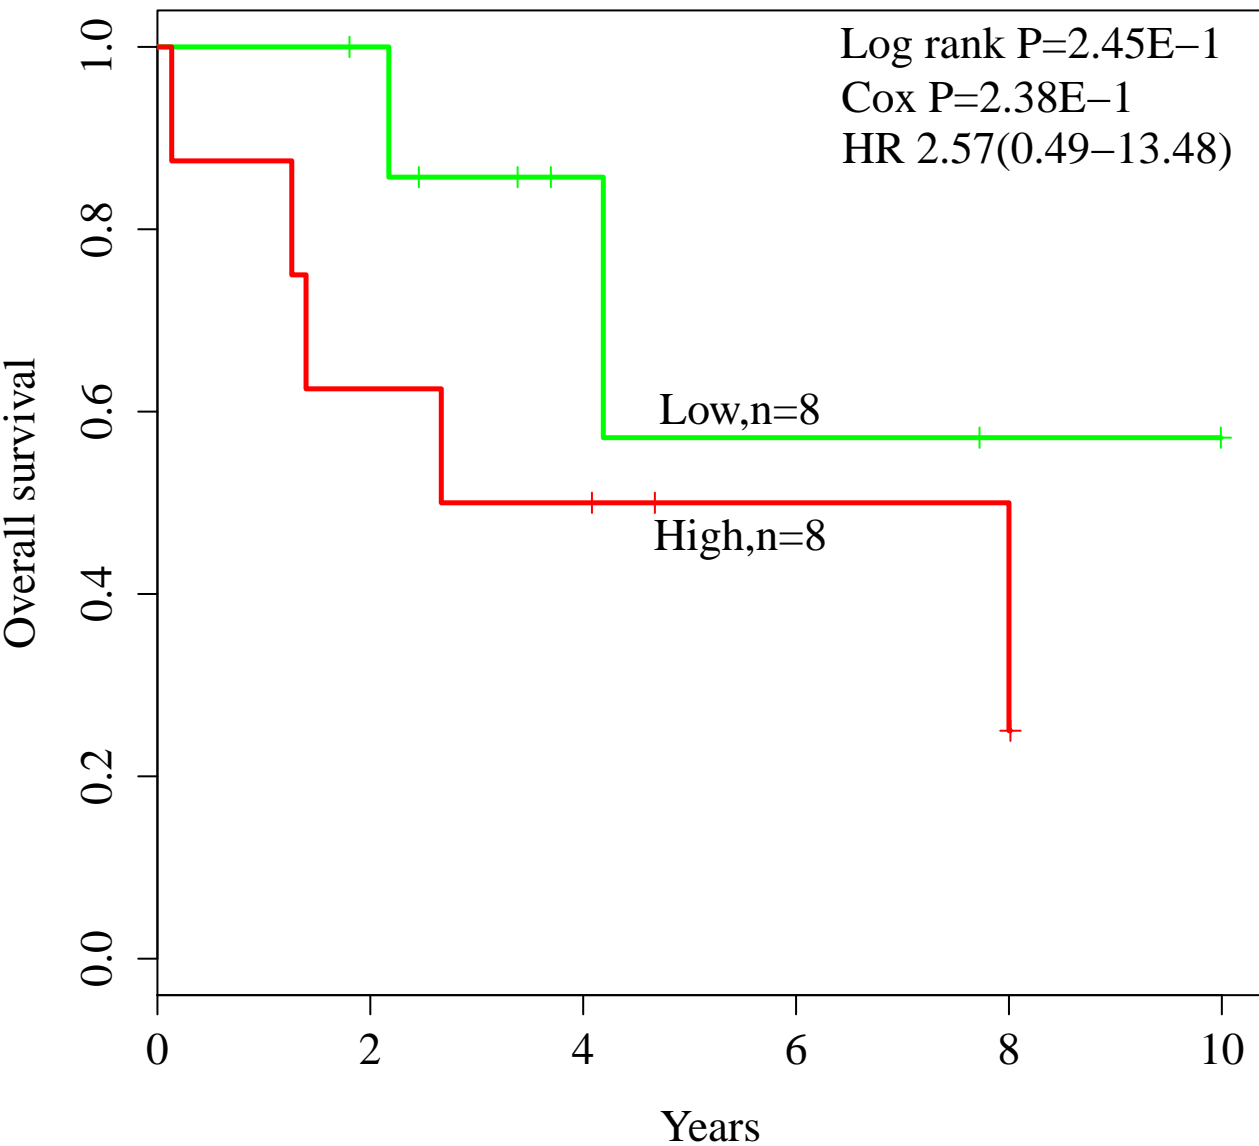

Supplement: c8mo00128f1.zip [file c8mo00128f1.zip]

# PRF1 for Low Grade Serous Carcinoma

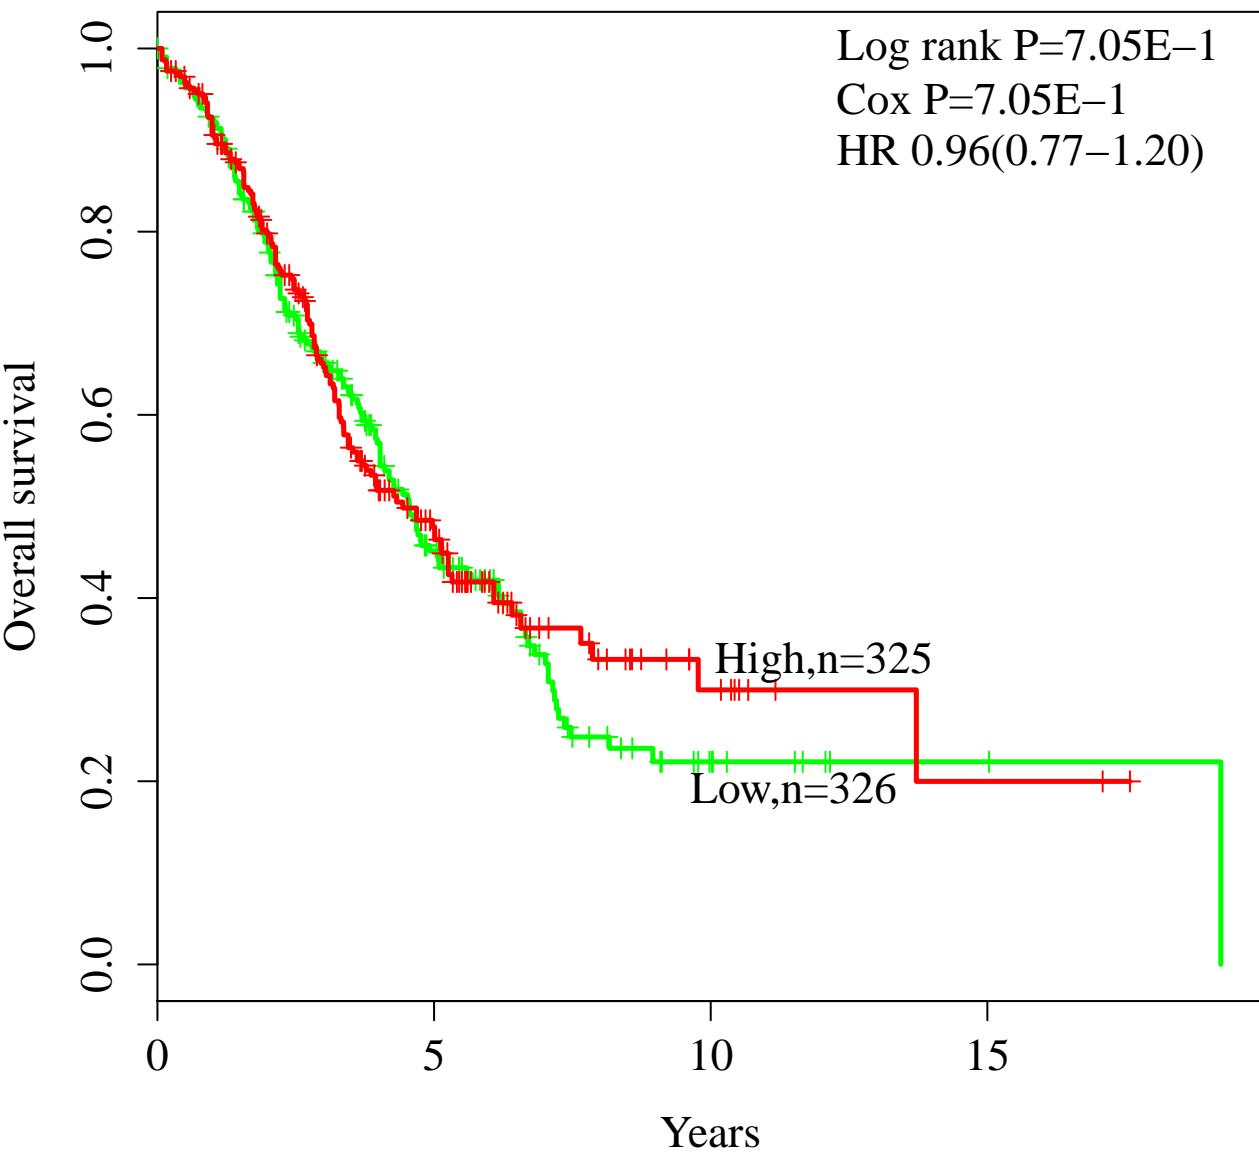

Supplement: c8mo00128f1.zip [file c8mo00128f1.zip]

## CD8B for Mucinous Carcinoma

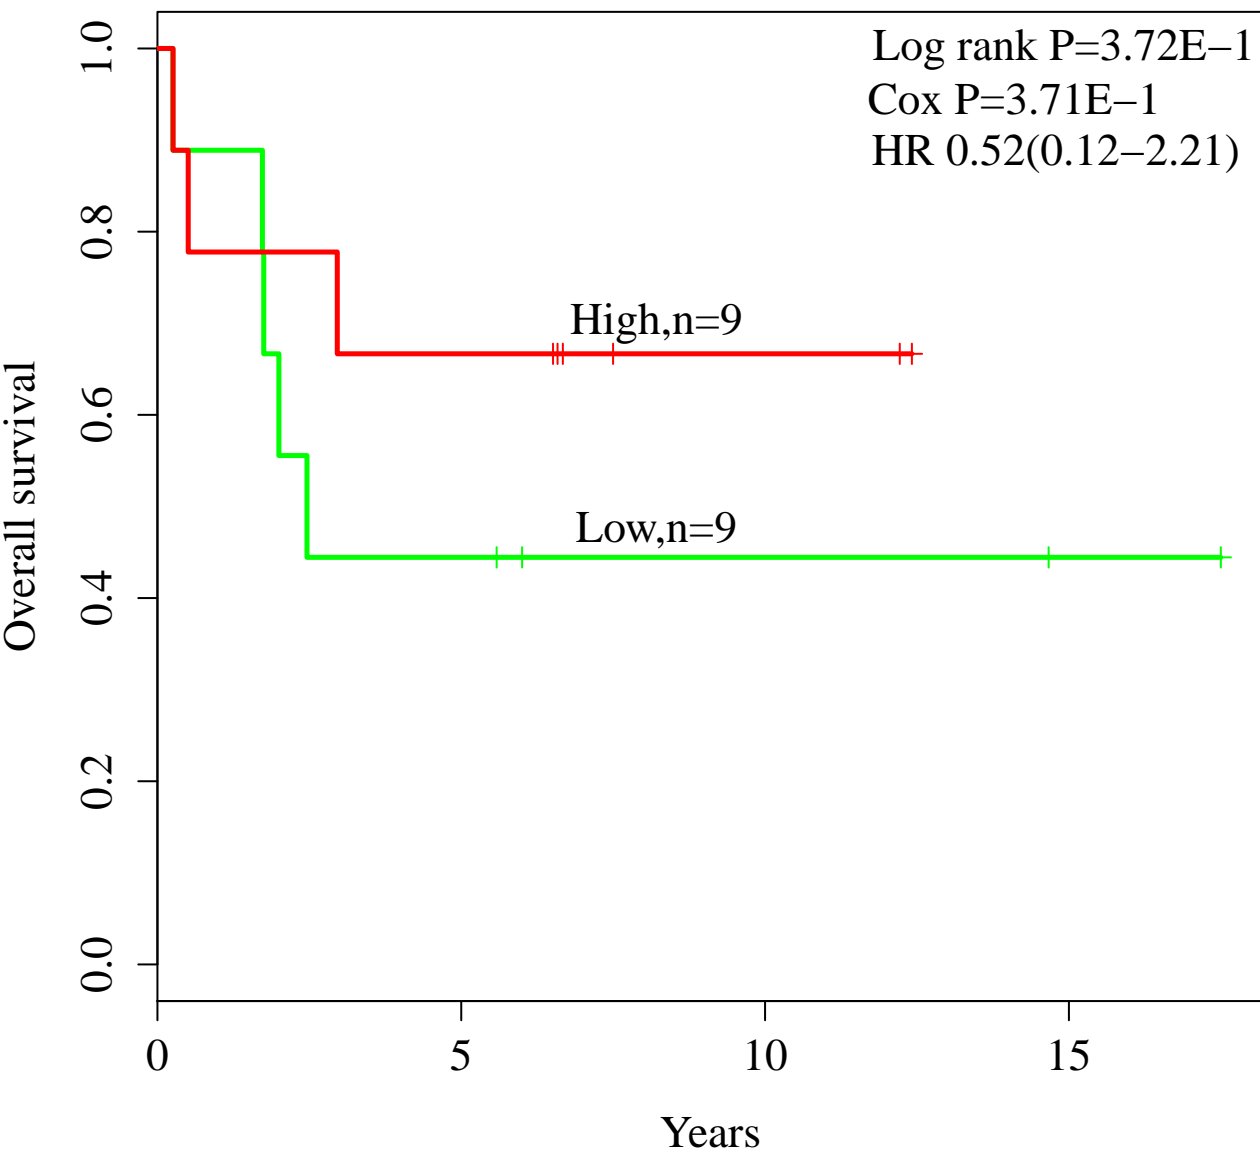

Supplement: c8mo00128f1.zip [file c8mo00128f1.zip]

# CD163 for Clear Cell Carcinoma

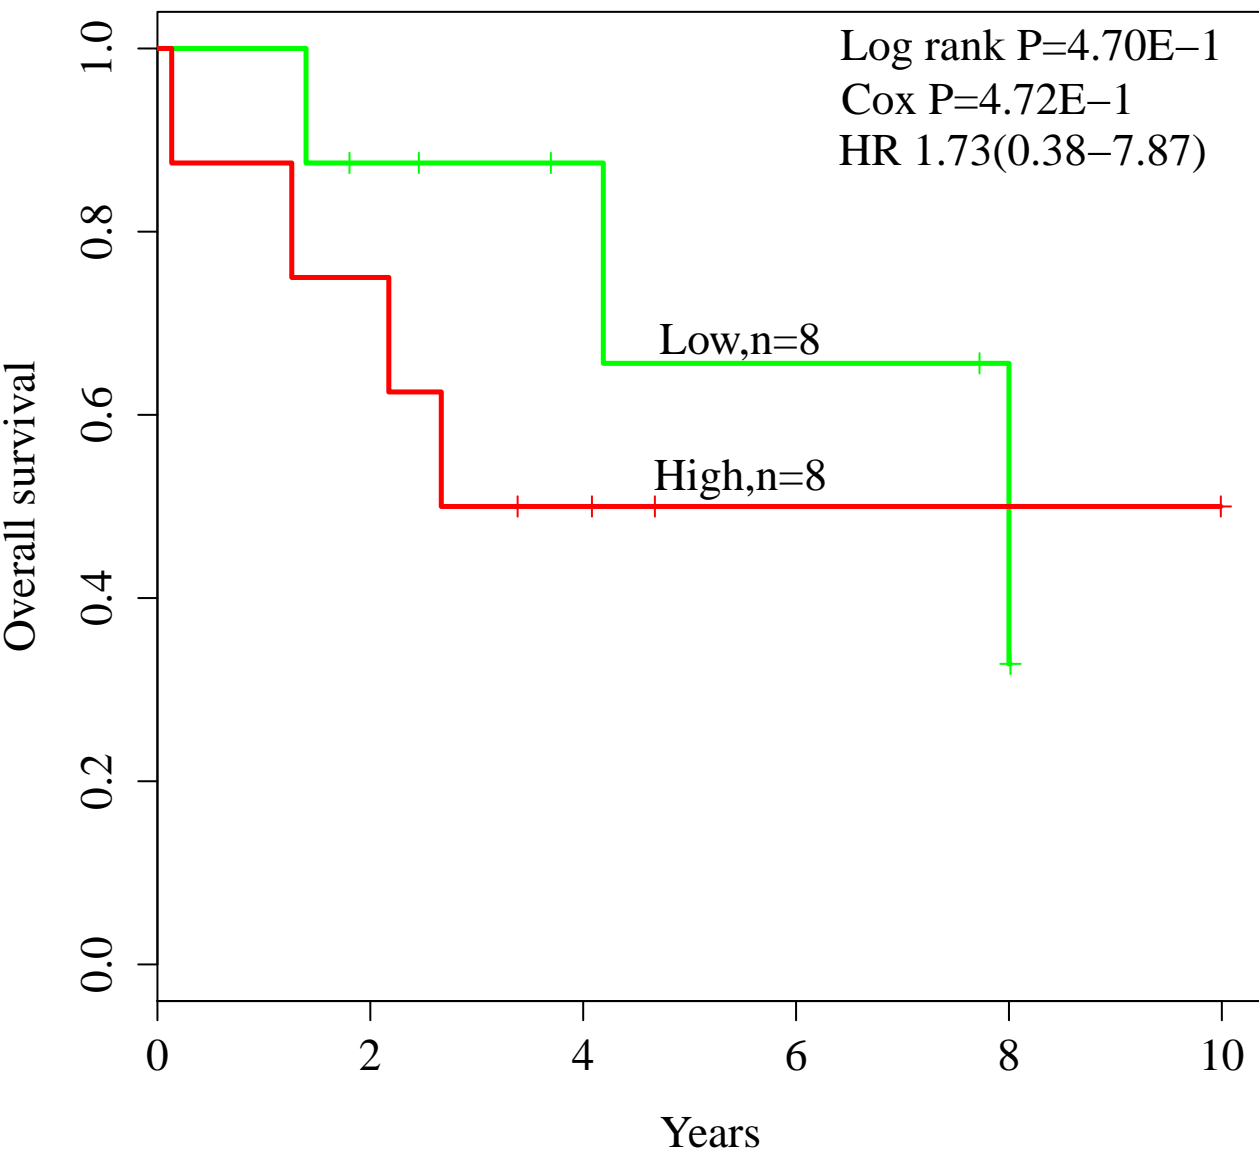

Supplement: c8mo00128f1.zip [file c8mo00128f1.zip]

# CD163 for Mucinous Carcinoma

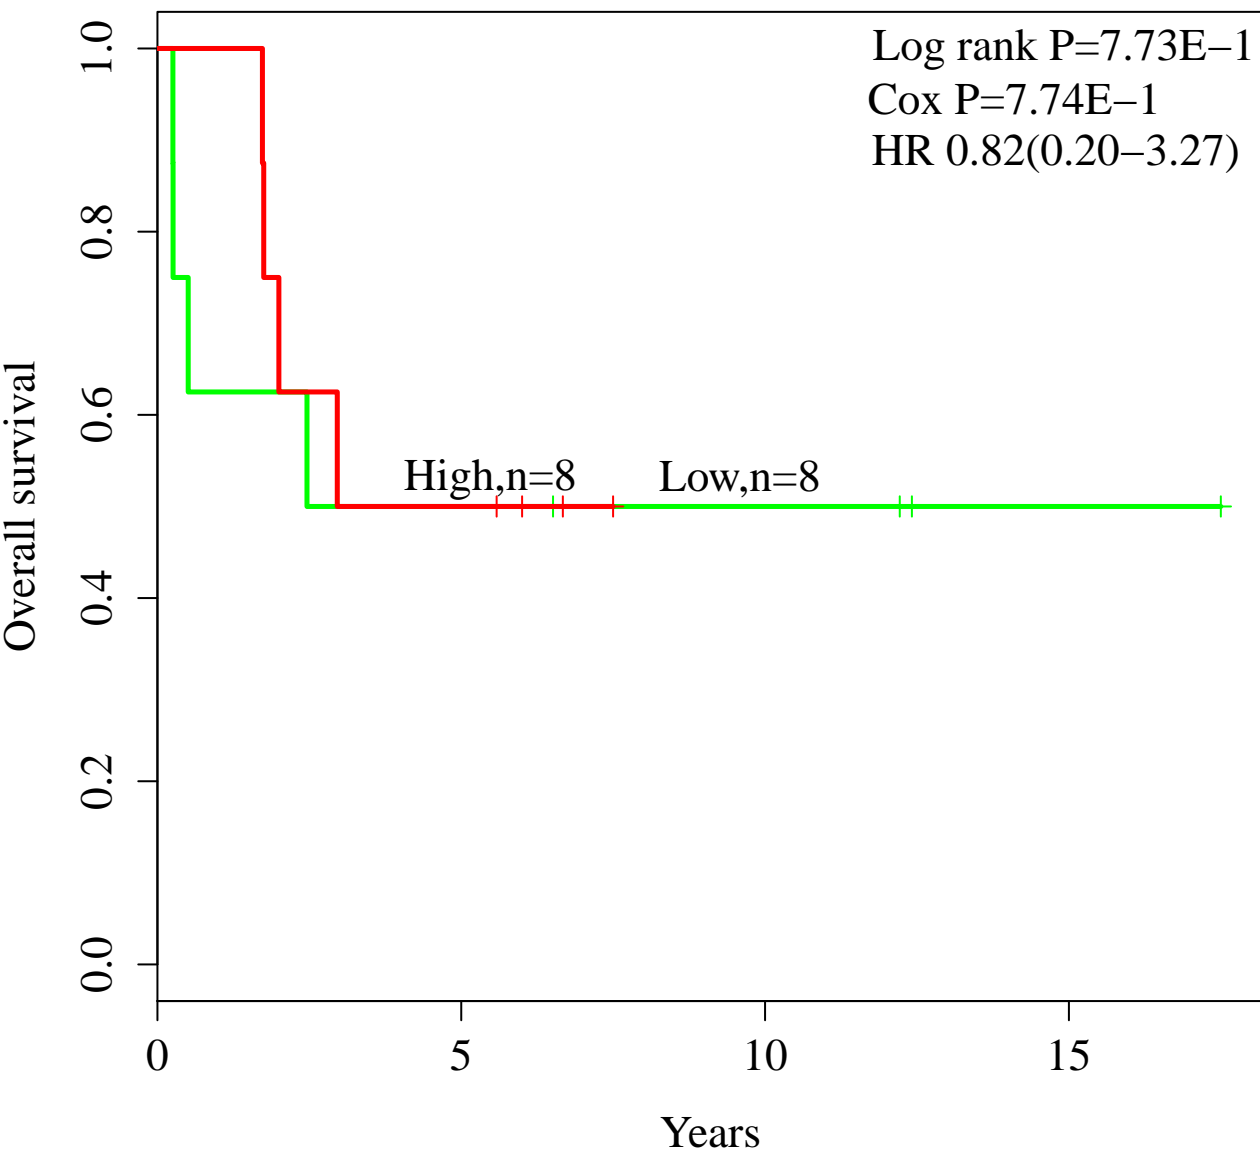

Supplement: c8mo00128f1.zip [file c8mo00128f1.zip]

# PRF1 for High Grade Serous Carcinoma

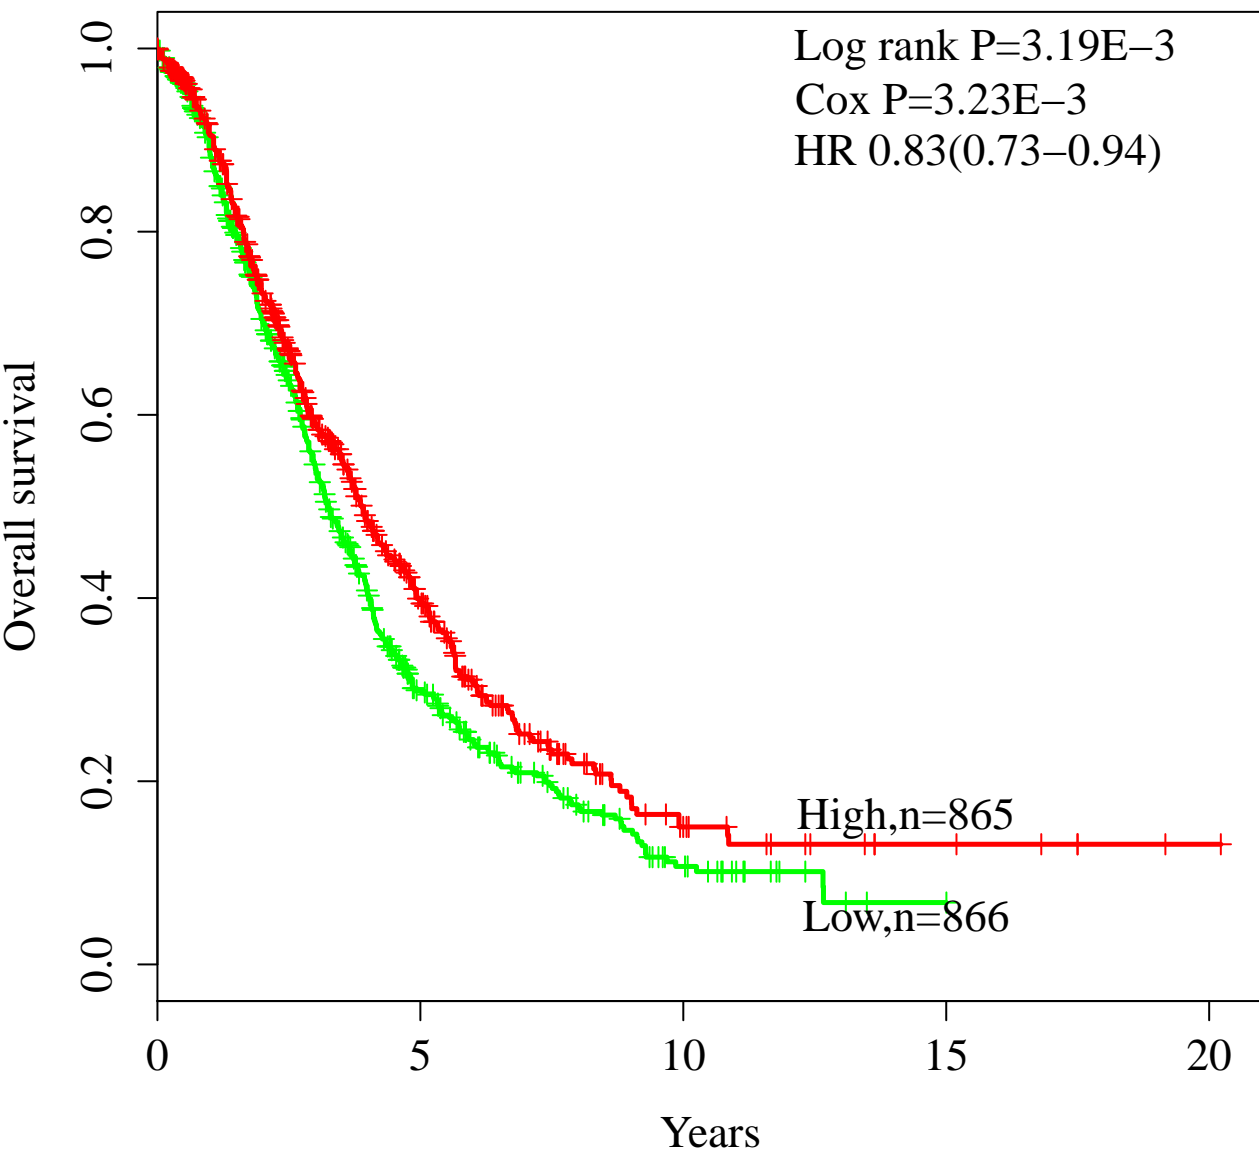

Supplement: c8mo00128f1.zip [file c8mo00128f1.zip]

# GZMA for Endometrioid Carcinoma

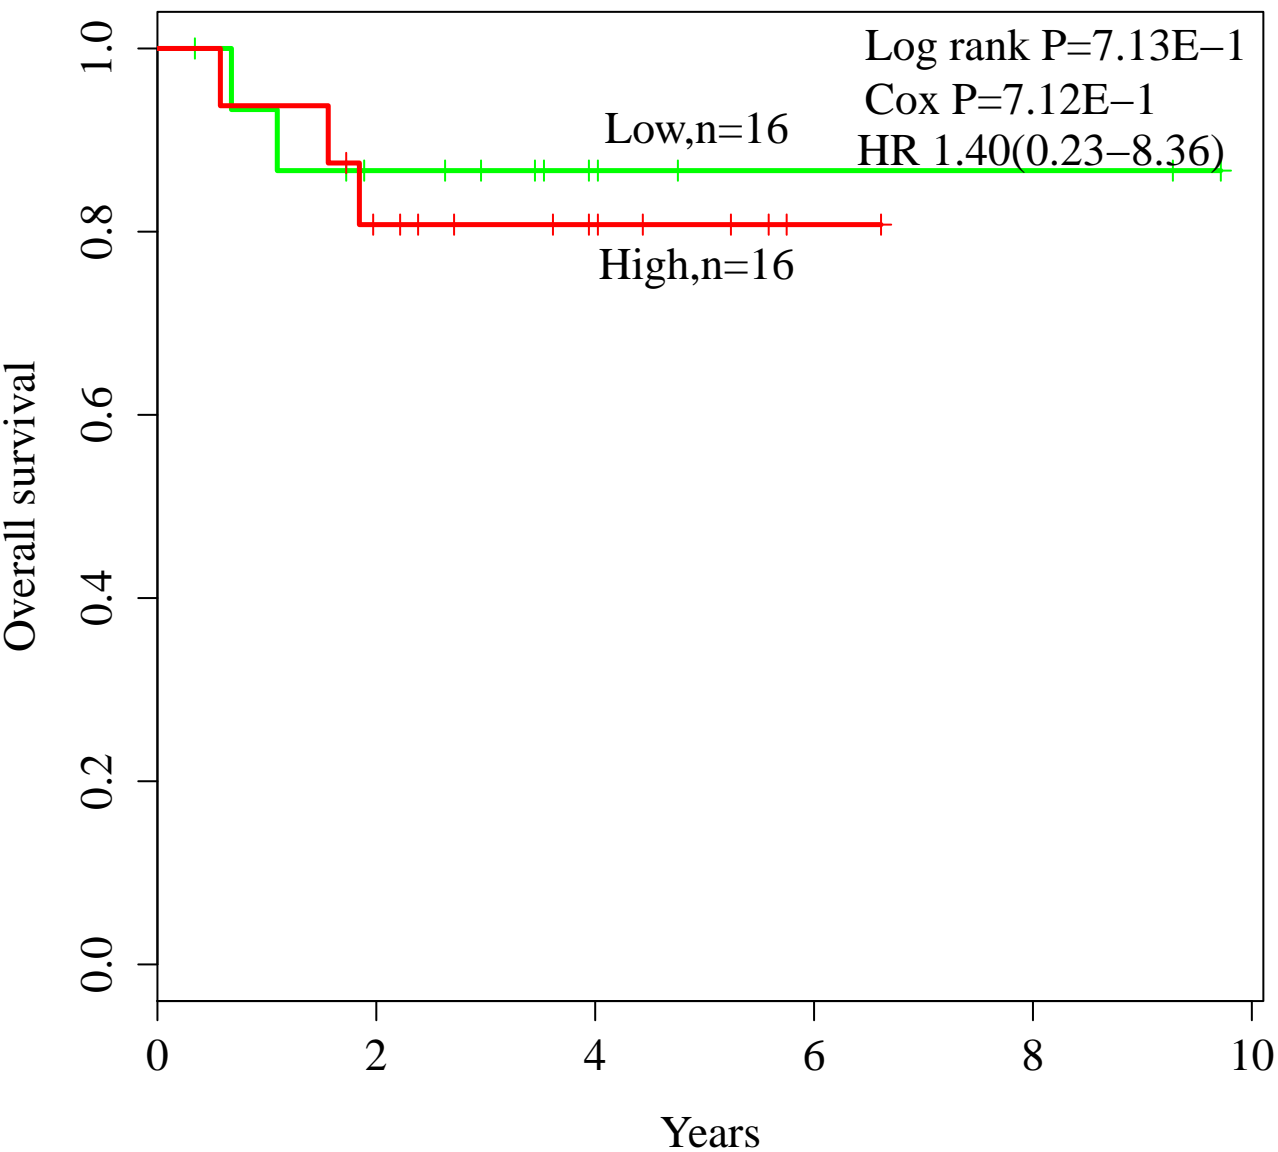

Supplement: c8mo00128f1.zip [file c8mo00128f1.zip]

# PDCD1 for Clear Cell Carcinoma

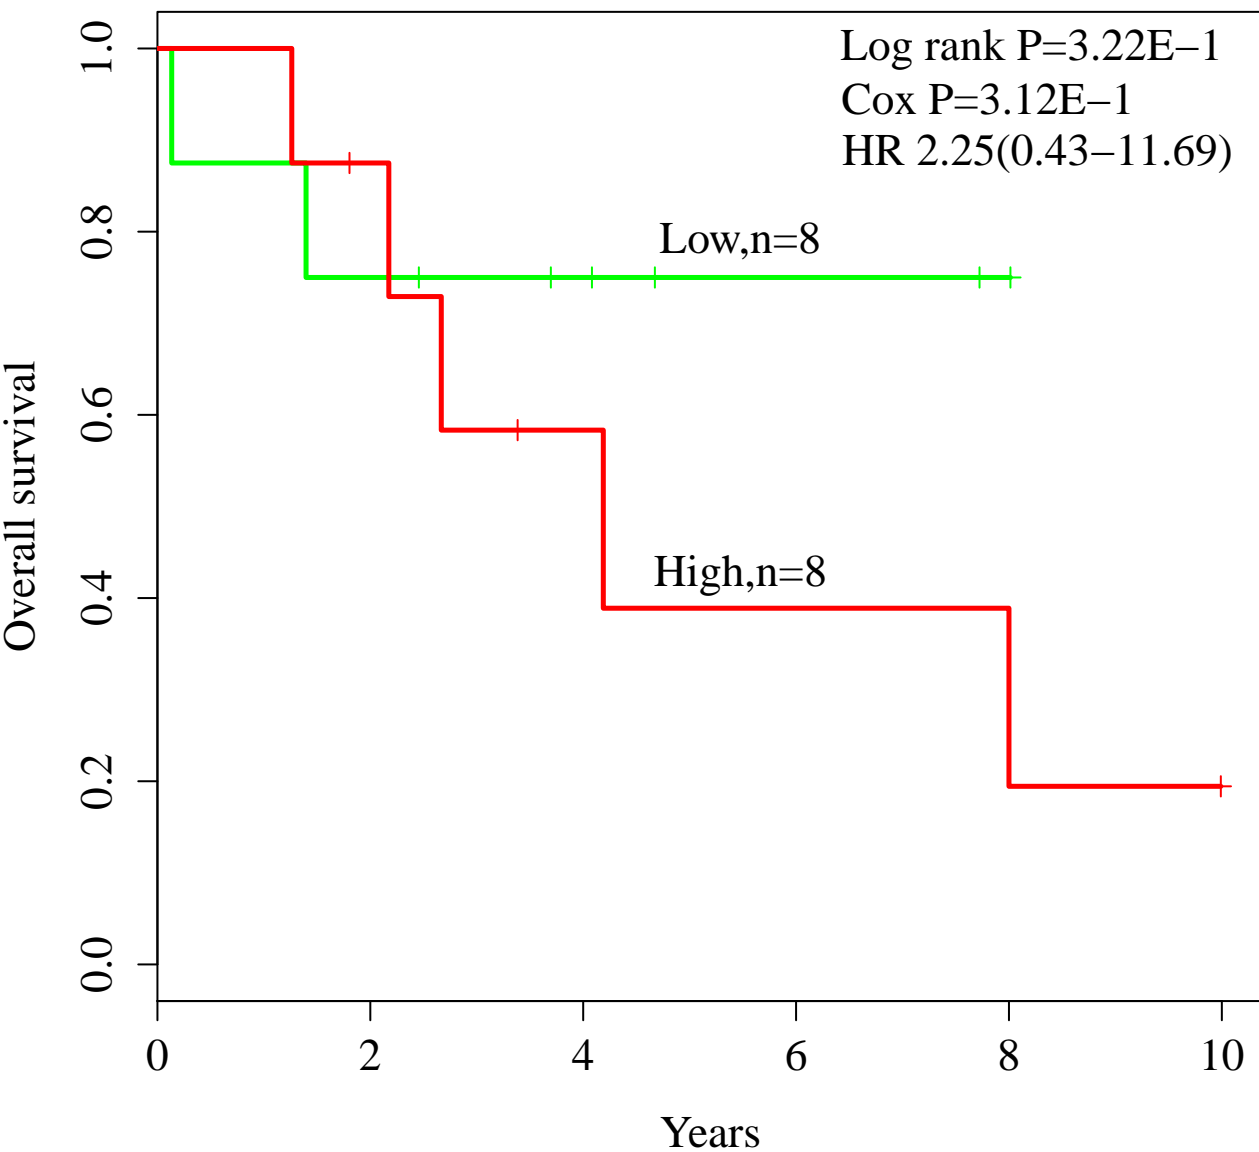

Supplement: c8mo00128f1.zip [file c8mo00128f1.zip]

# HLA-B for Mucinous Carcinoma

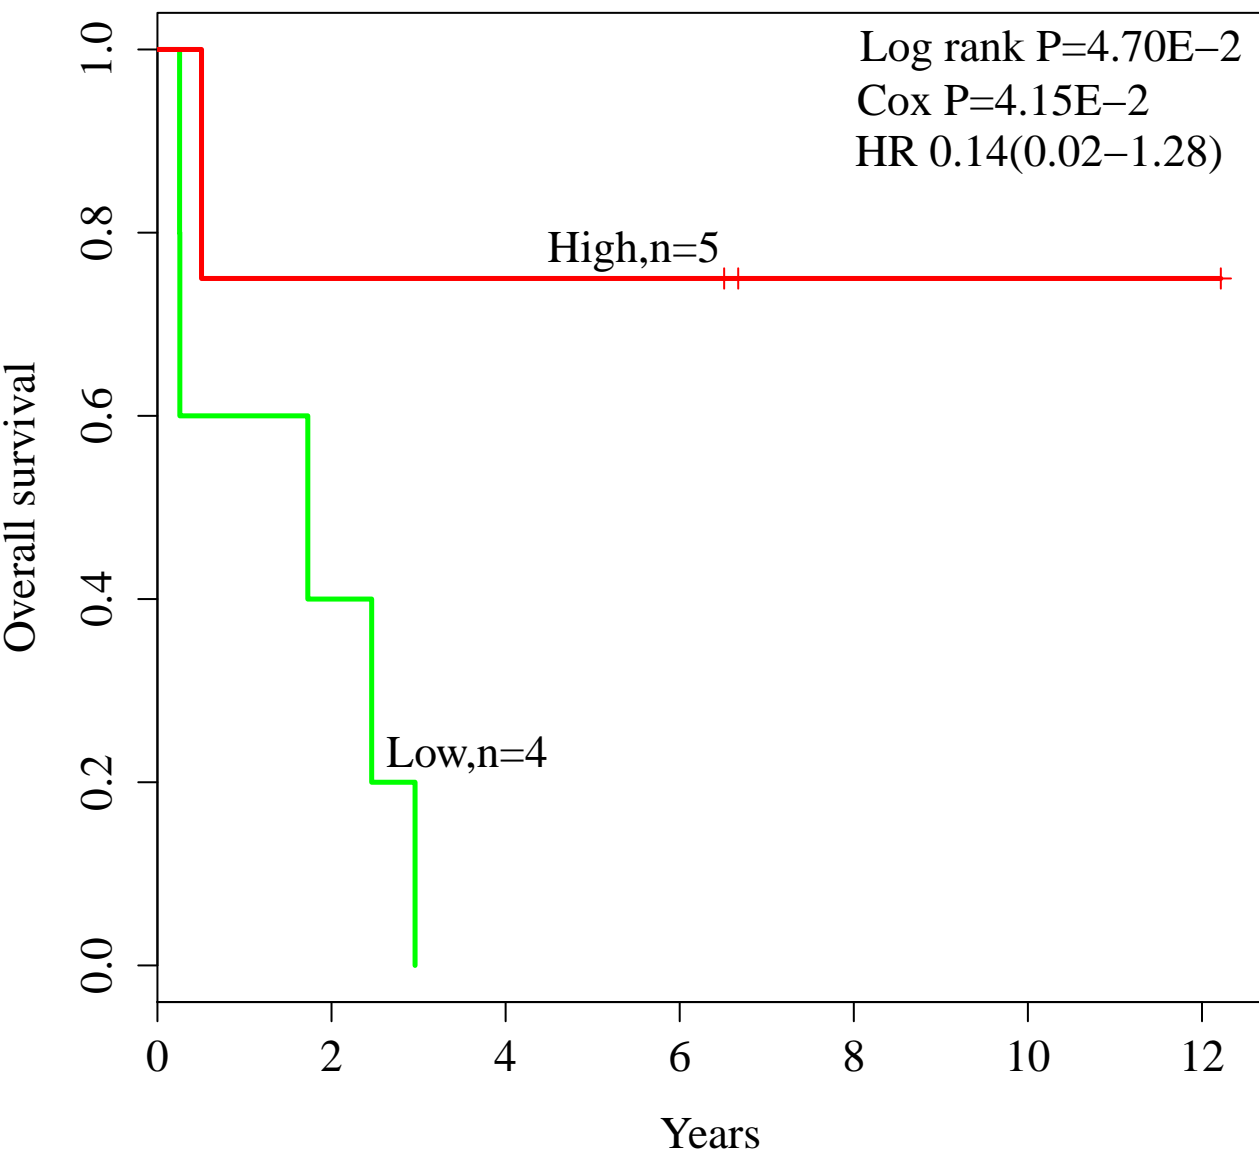

Supplement: c8mo00128f1.zip [file c8mo00128f1.zip]

# CD8B for Endometrioid Carcinoma

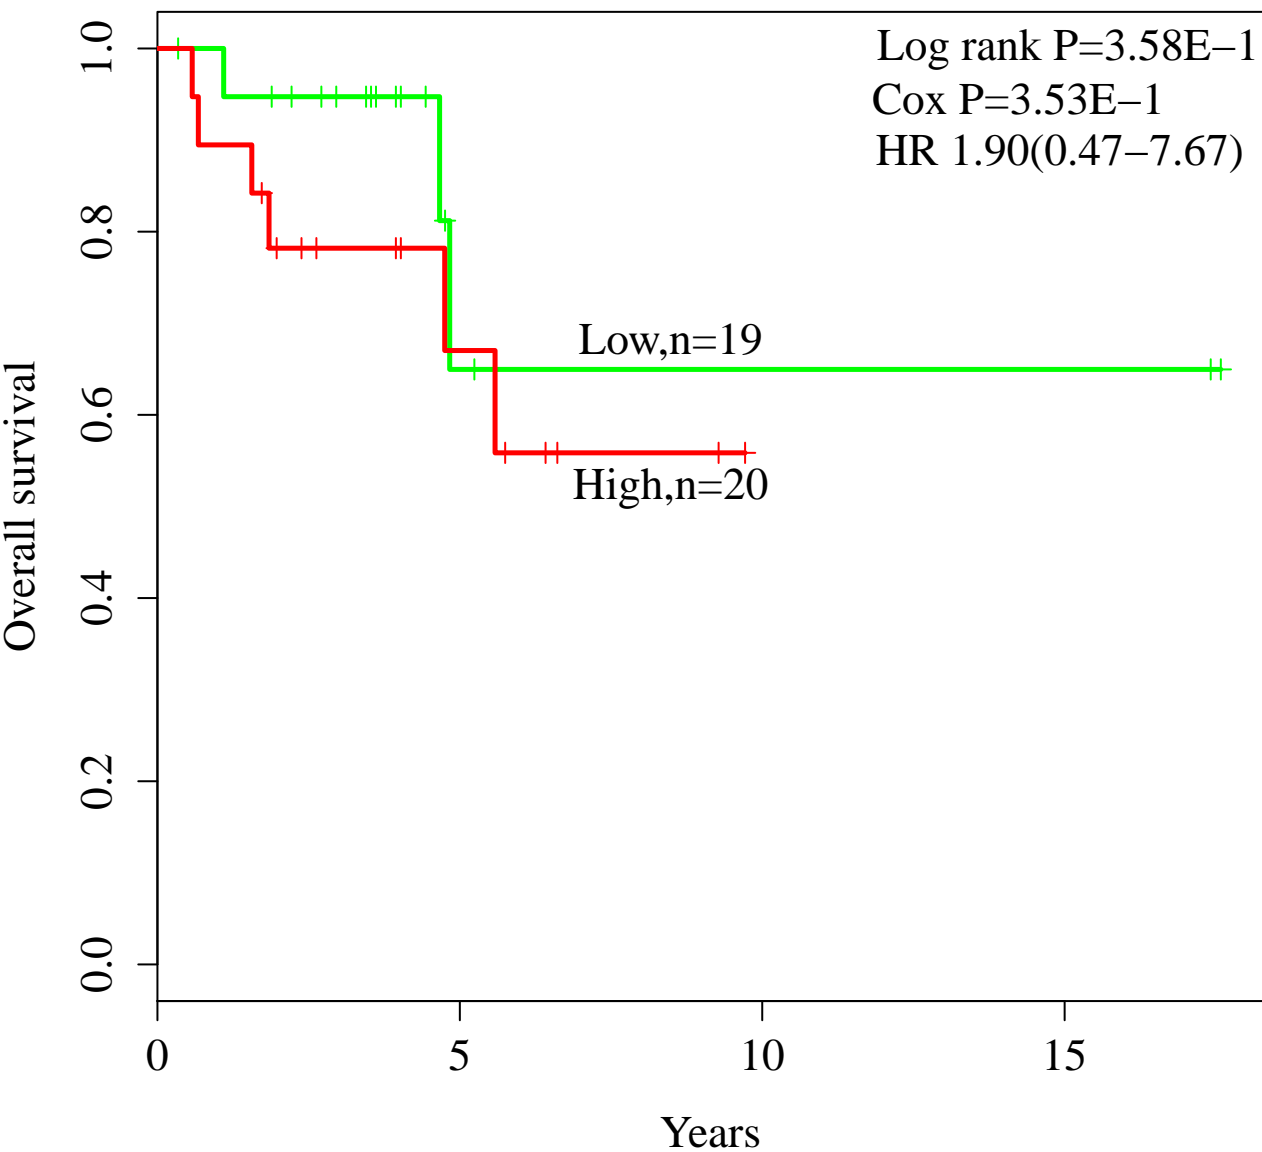

Supplement: c8mo00128f1.zip [file c8mo00128f1.zip]

# CD8A for Low Grade Serous Carcinoma

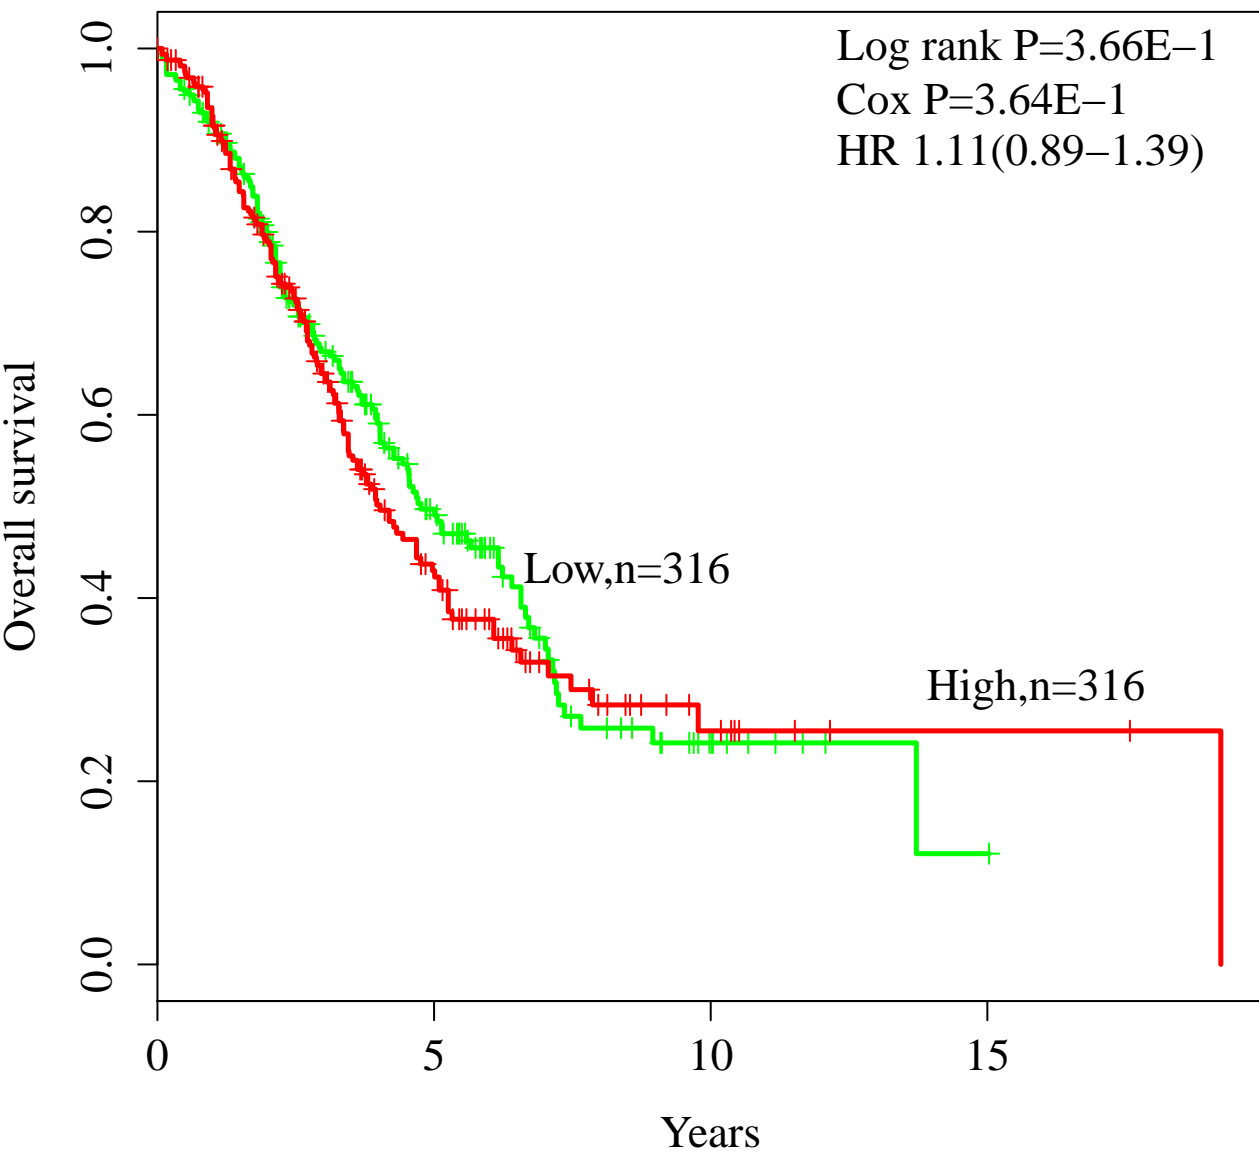

Supplement: c8mo00128f1.zip [file c8mo00128f1.zip]

# CD8A for Mucinous Carcinoma

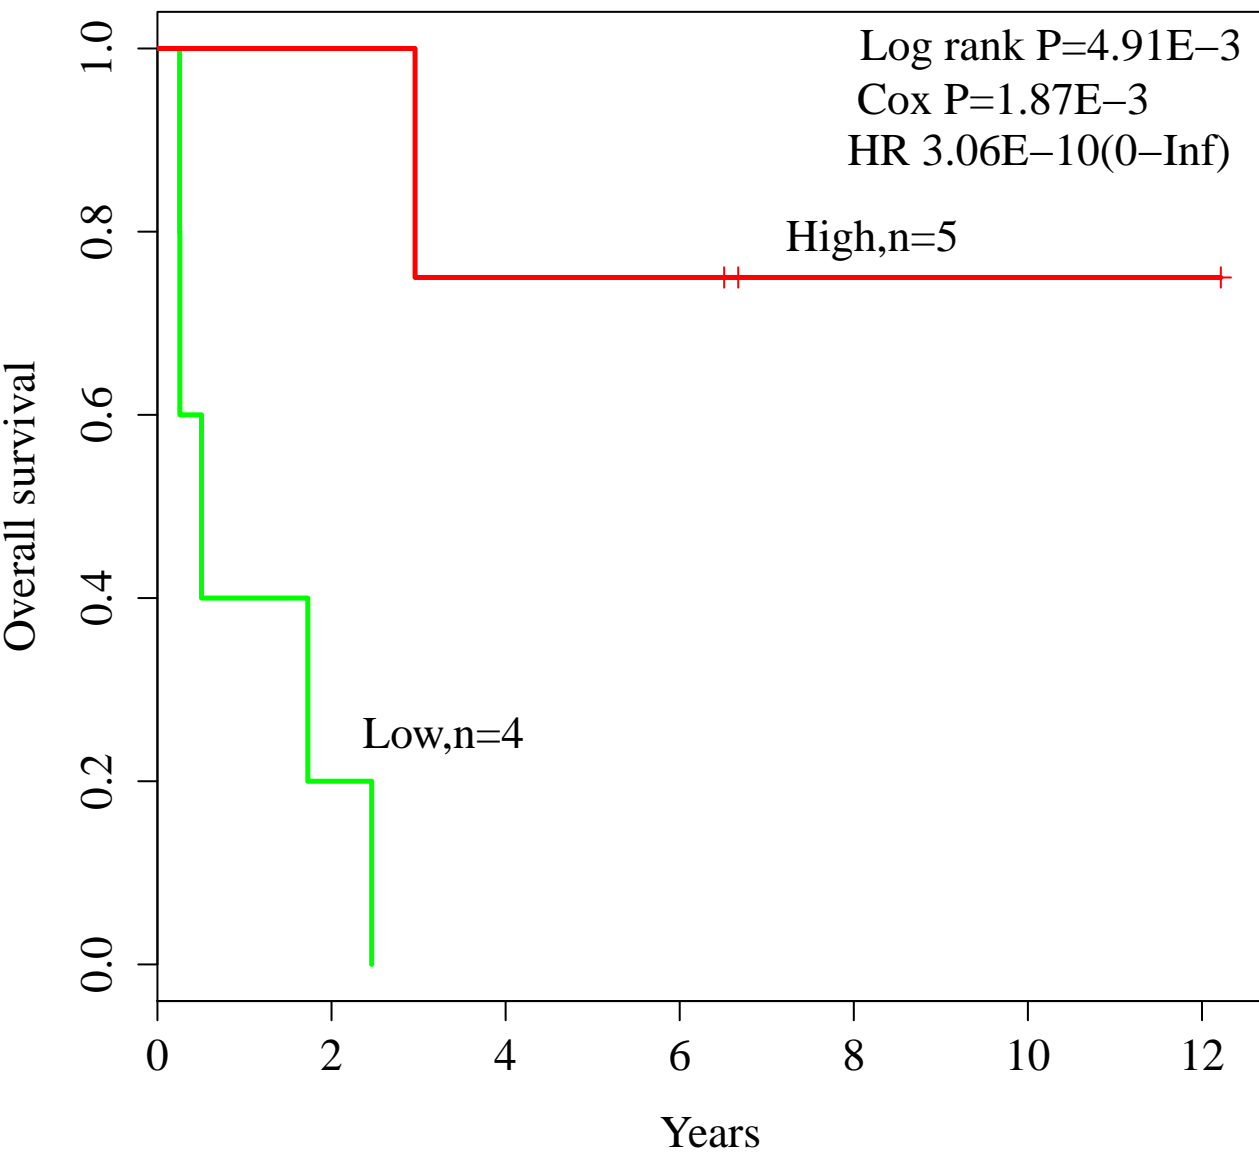

Supplement: c8mo00128f1.zip [file c8mo00128f1.zip]

# GZMA for Mucinous Carcinoma

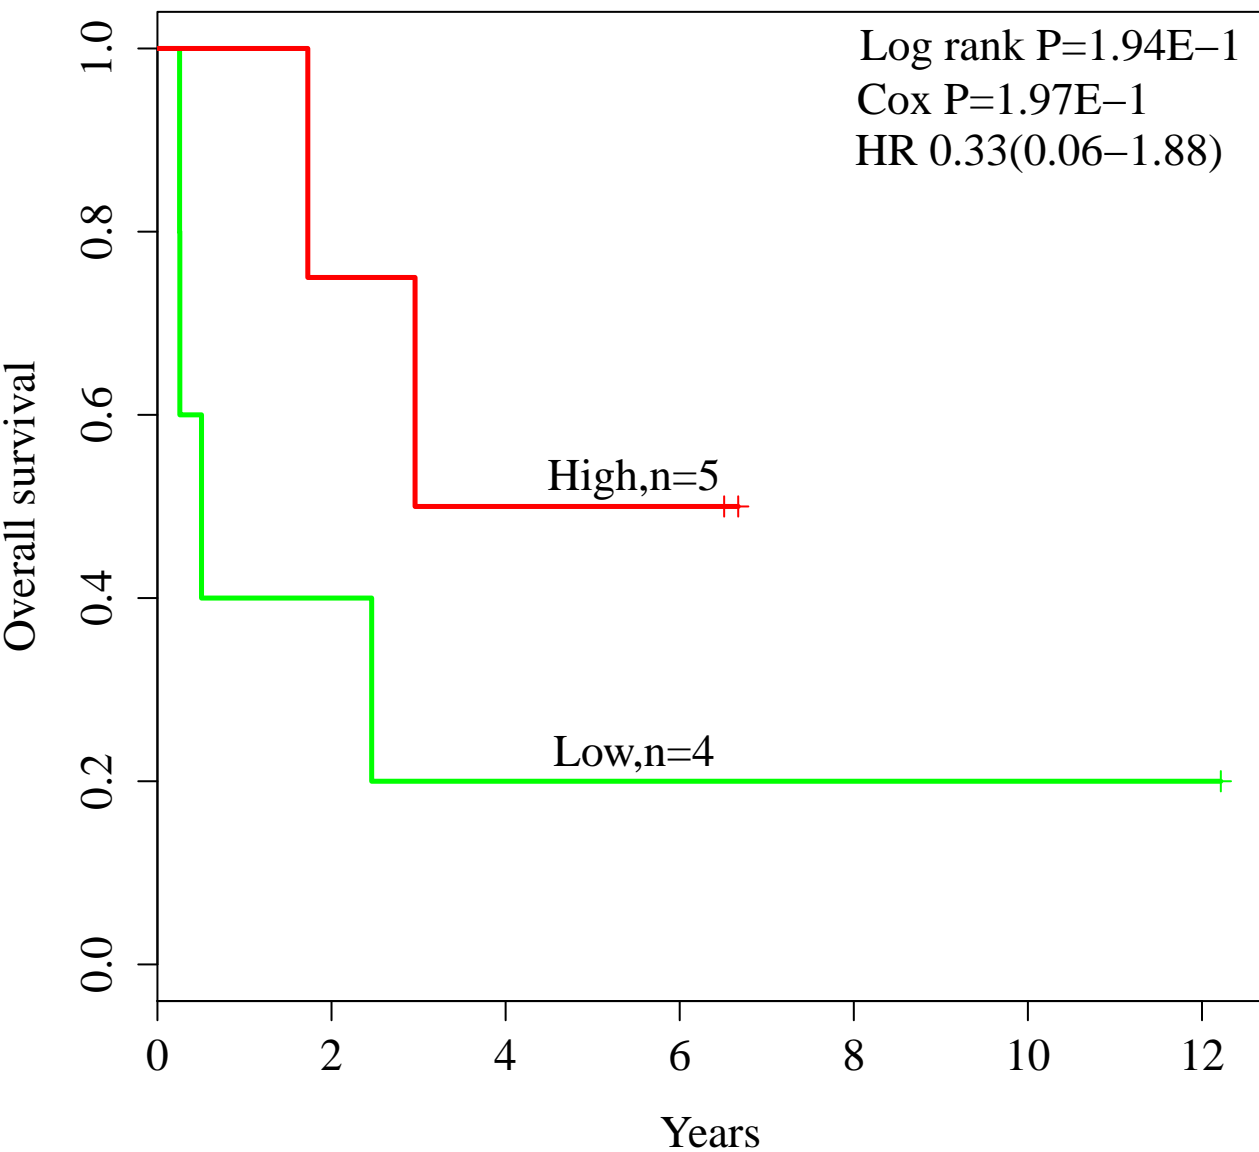

Supplement: c8mo00128f1.zip [file c8mo00128f1.zip]

# CD8A for Endometrioid Carcinoma

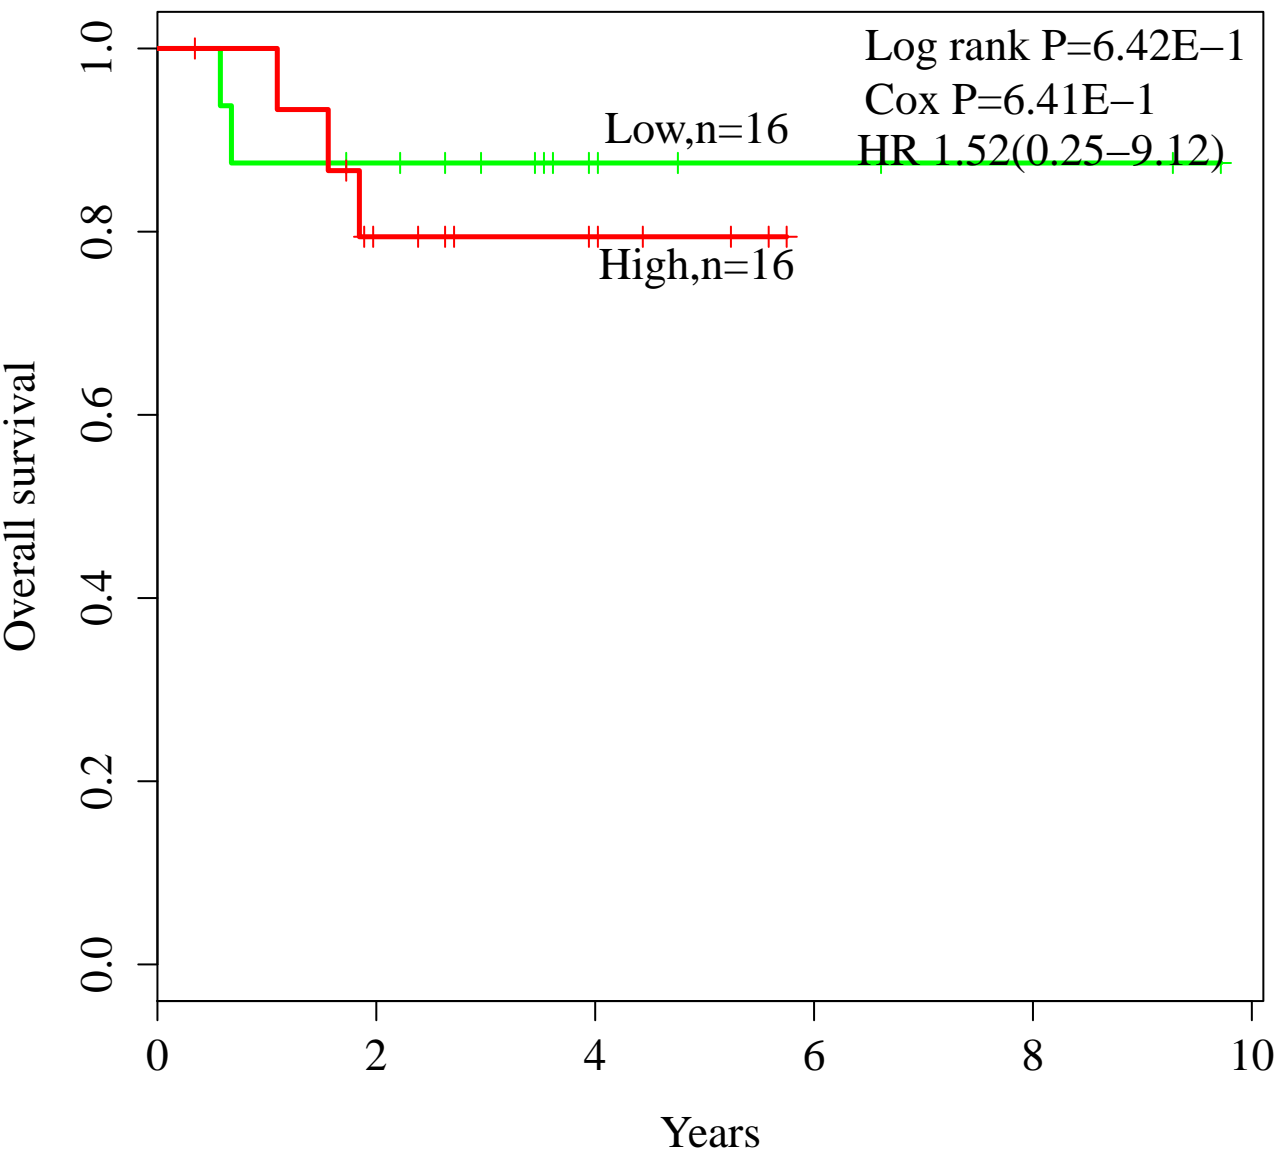

Supplement: c8mo00128f1.zip [file c8mo00128f1.zip]

# CD8A for Clear Cell Carcinoma

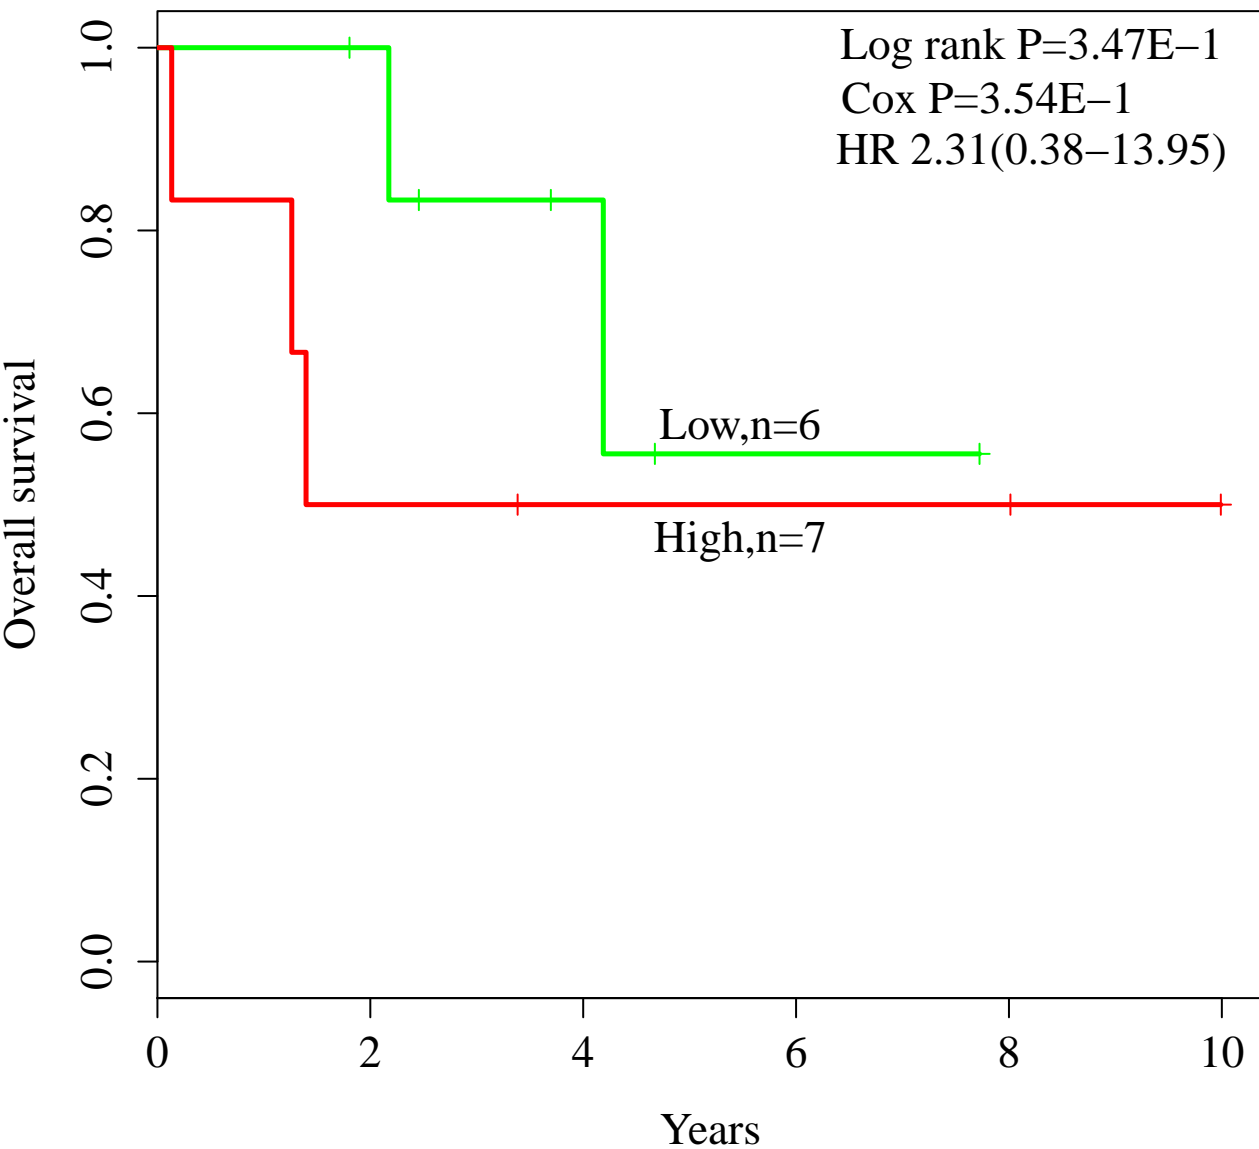

Supplement: c8mo00128f1.zip [file c8mo00128f1.zip]

# CD163 for Endometrioid Carcinoma

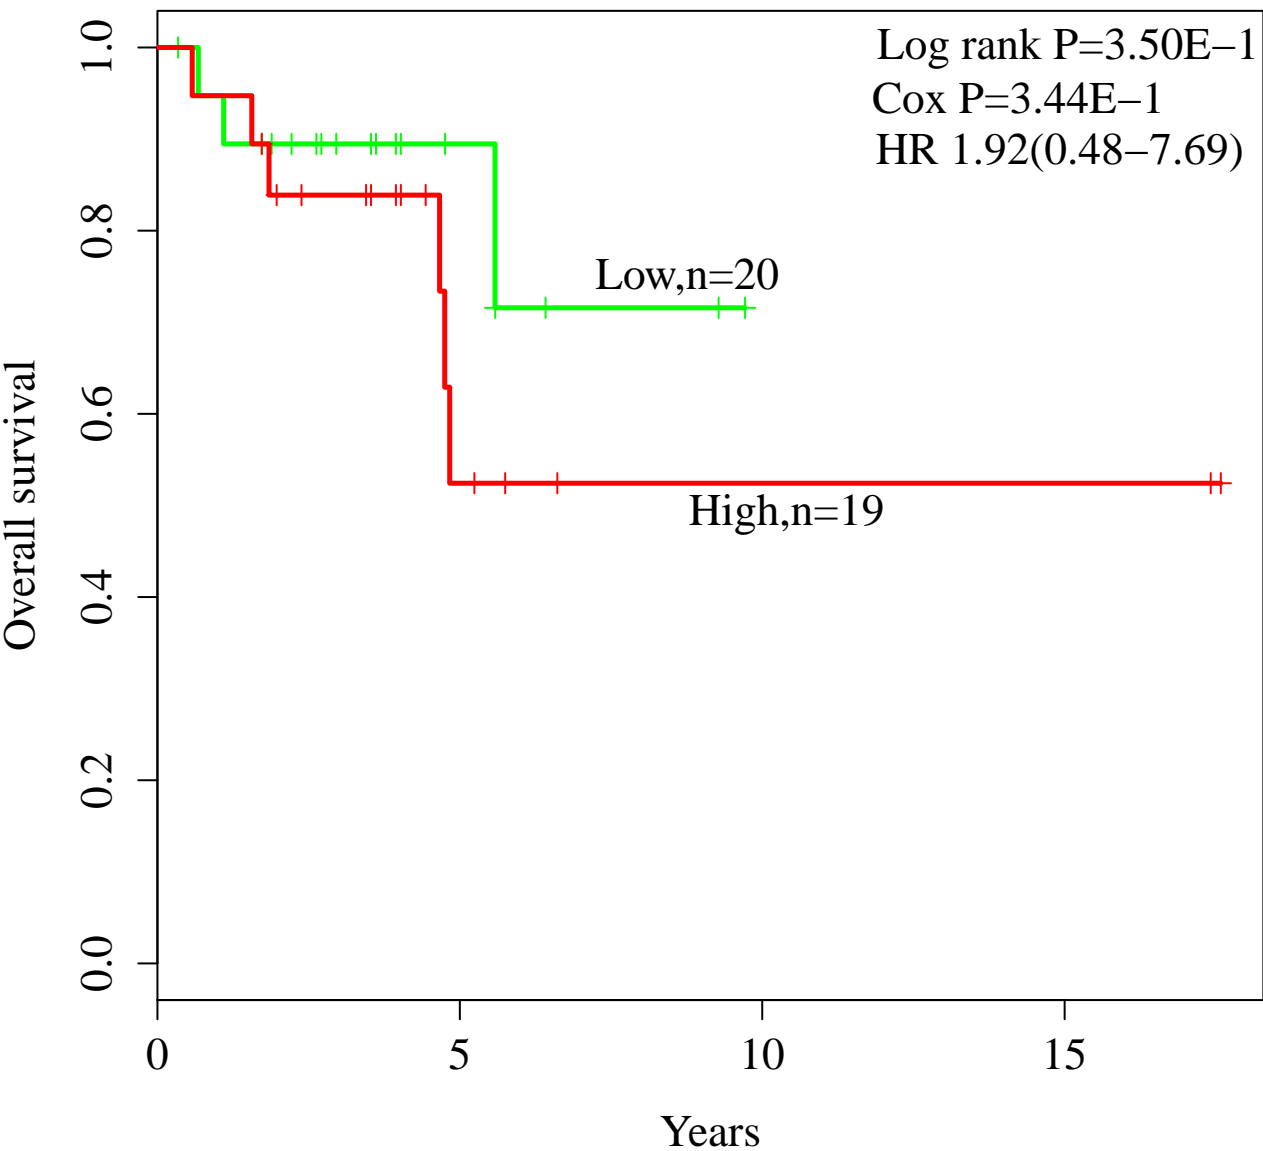

Supplement: c8mo00128f1.zip [file c8mo00128f1.zip]

# PDCD1 for Low Grade Serous Carcinoma

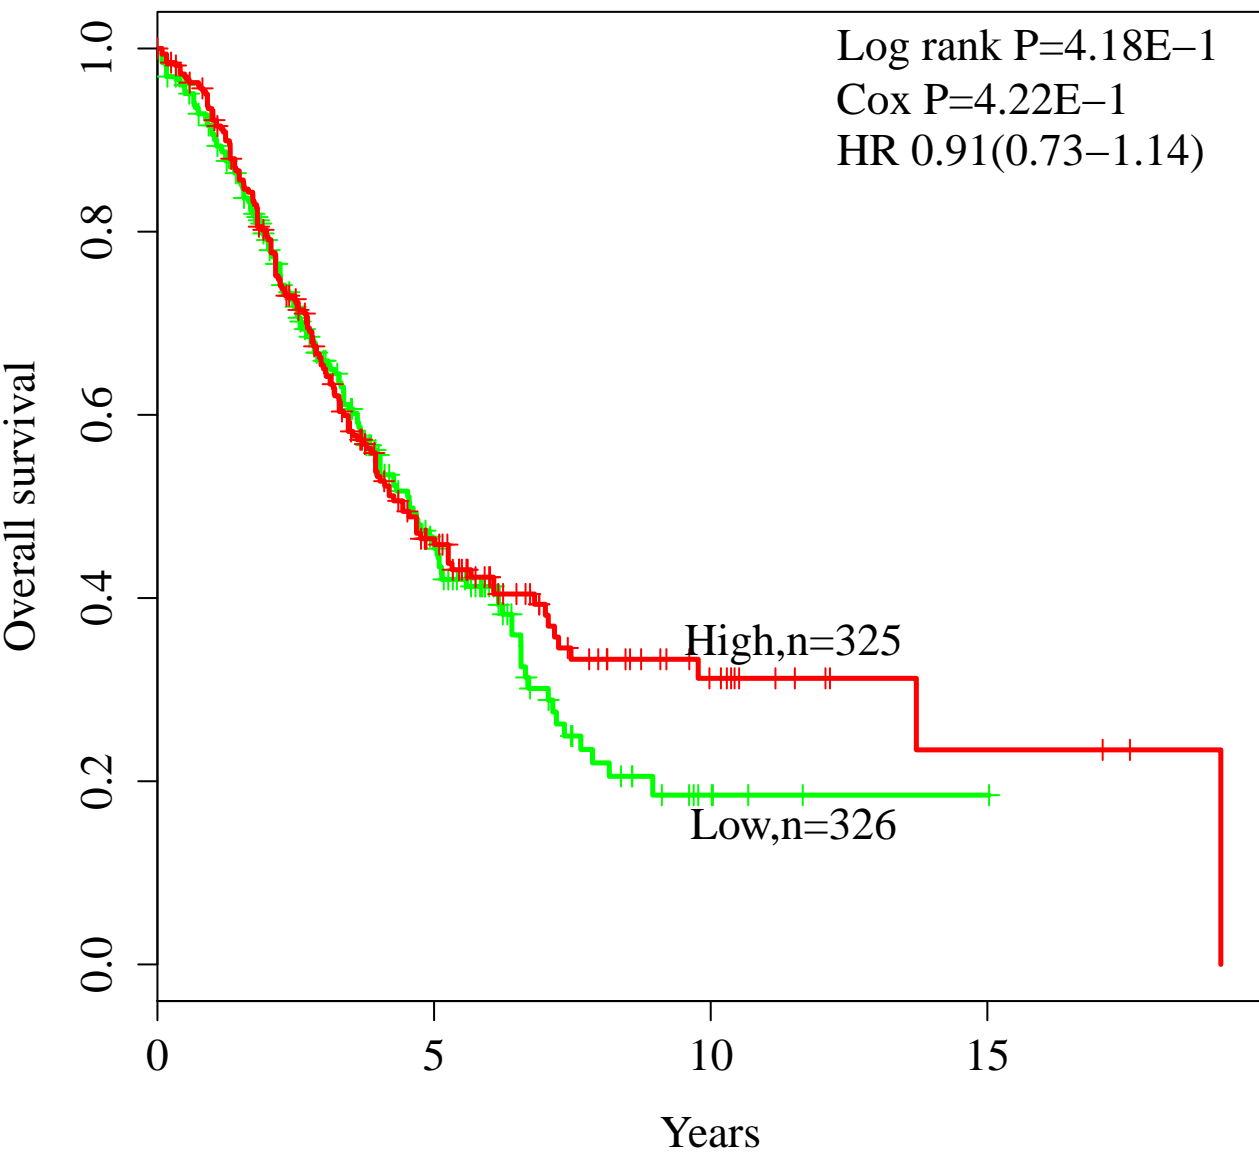

Supplement: c8mo00128f1.zip [file c8mo00128f1.zip]

# PRF1 for Clear Cell Carcinoma

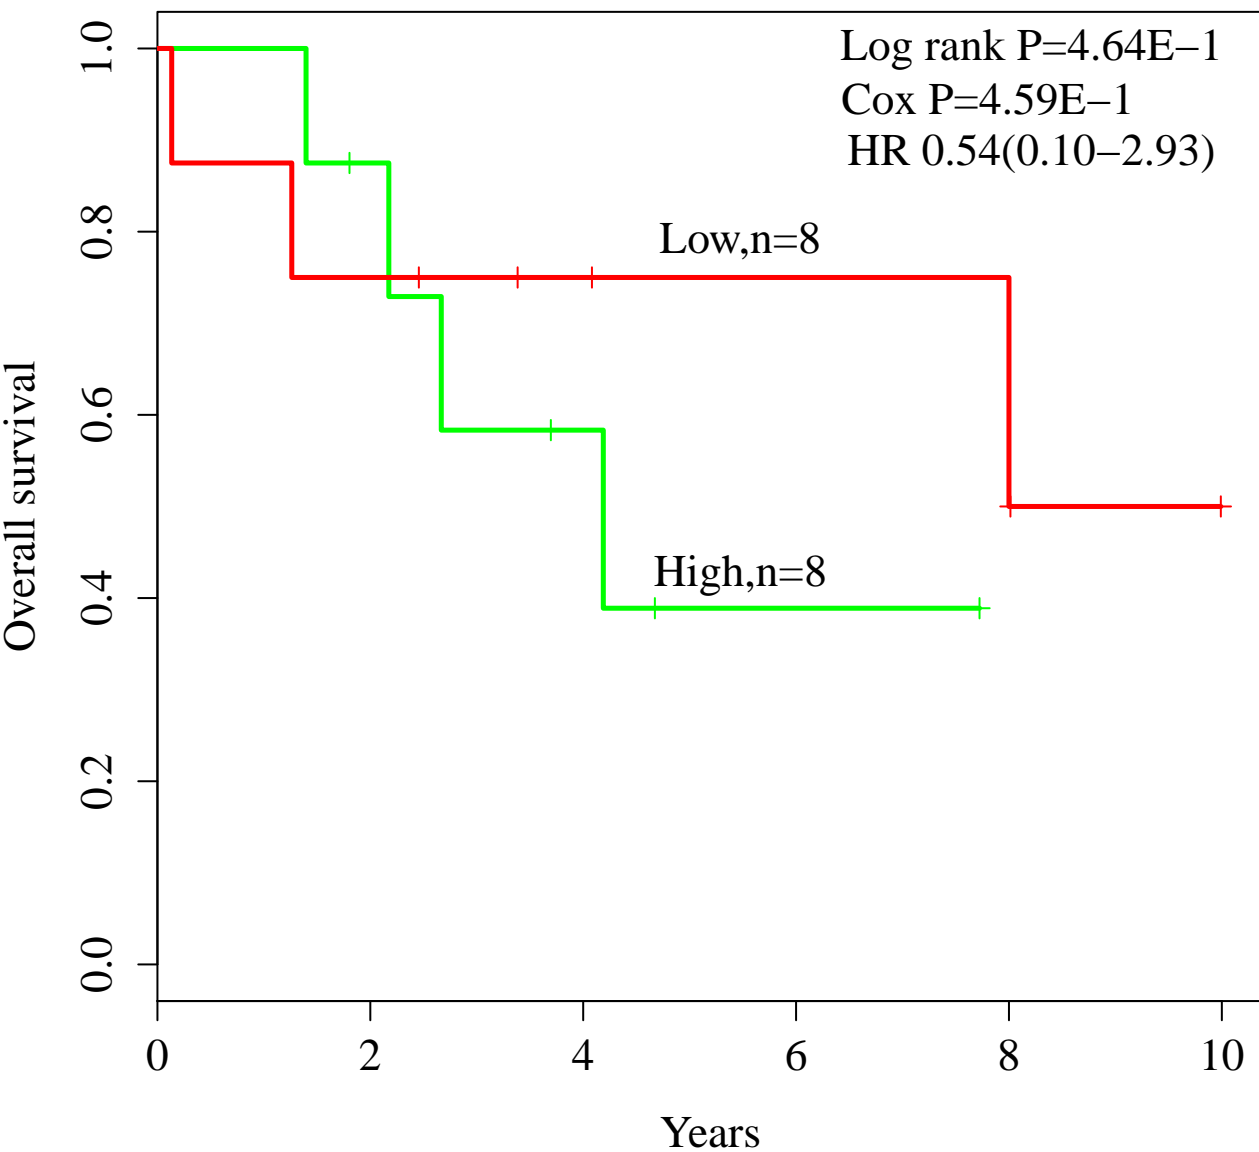

Supplement: c8mo00128f1.zip [file c8mo00128f1.zip]

# HLA-A for High Grade Serous Carcinoma

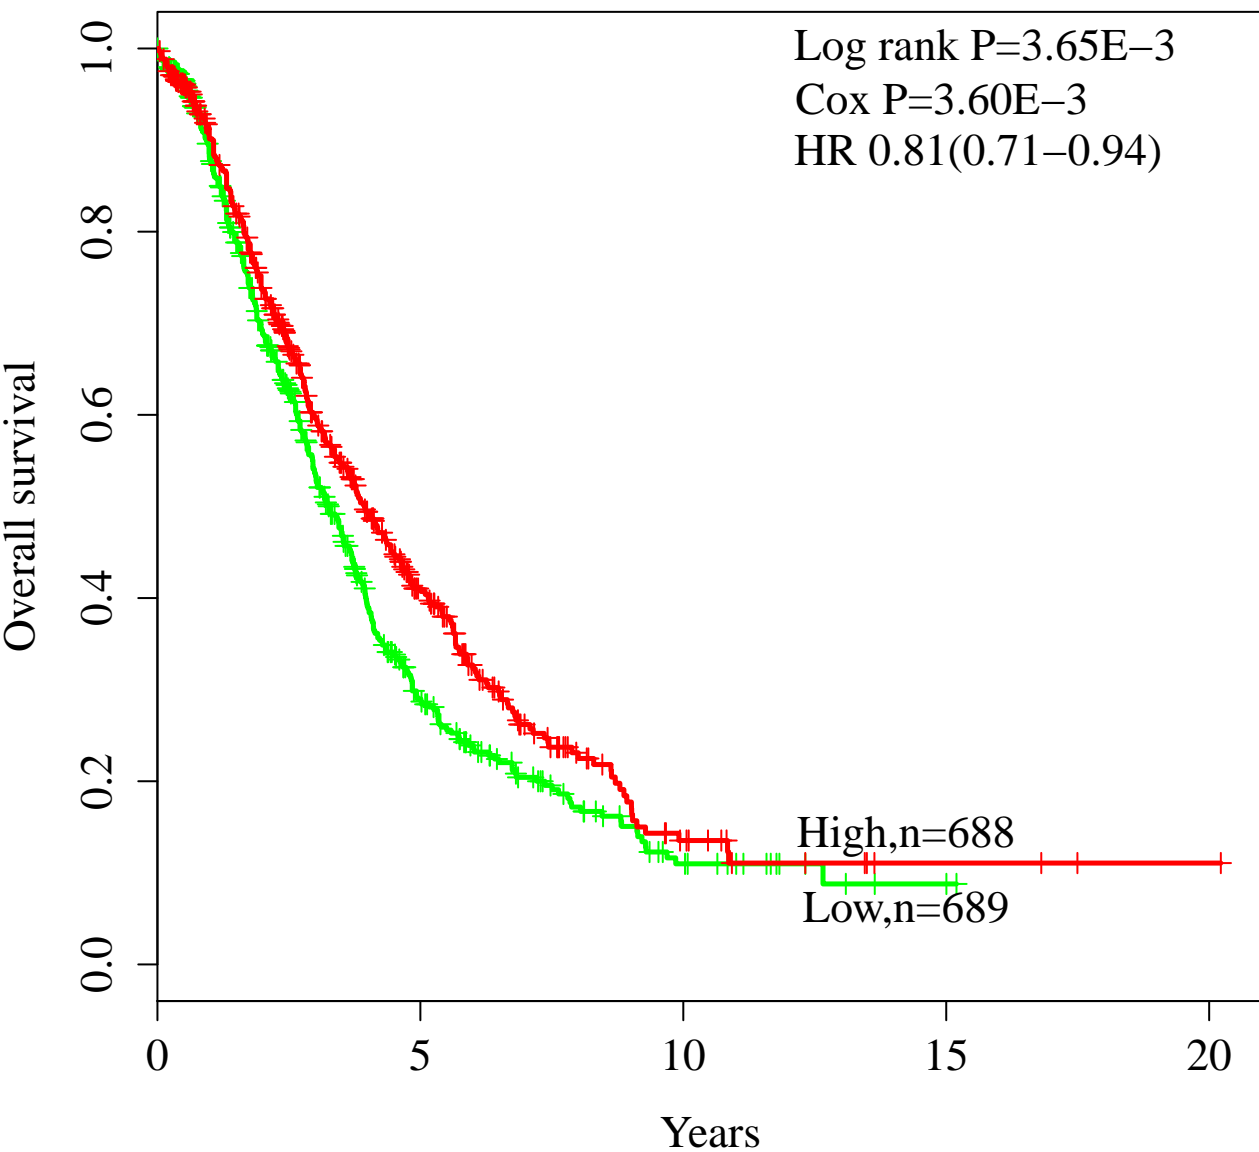

Supplement: c8mo00128f1.zip [file c8mo00128f1.zip]
